# Supplementary material for: Integrating Network Pharmacology and Experimental Validation to Investigate the Mechanisms of Huazhuojiedu Decoction to Treat Chronic Atrophic Gastritis
Source: Evid Based Complement Alternat Med. 2020 Dec 7;2020:2638362. doi: 10.1155/2020/2638362 (PMC7735863; doi:10.1155/2020/2638362)
Supplement: Supplementary Materials — Table S1: information pertaining to the 180 active compounds of HZJD decoction. Table S2: information pertaining to the 1249 targets of HZJD decoction. Table S3: the 575 significant genes associated with CAG. Table S4: the 156 potential targets for the ingredients of HZJD decoction in CAG treatment. Figure 1: PPI network of 155 common targets. The higher the degree, the redder the color, demonstrating the key targets for the treatment of CAG. Figure 2: herb-target-pathway network of HZJD decoction acting on CAG. The blue nodes represent herbs, the red nodes represent targets, and the gray nodes represent pathways. [file 2638362.f1.zip › Supplementary Materials/Supplementary Table S1.xlsx]

## Sheet: Sheet1
Supplementary Table S1 ：Information pertaining to the 180 active compounds of HZJD decoction
Herbs	Mol ID	Molecule Name	OB (%)	DL	Uniprot ID
Yinchen	MOL000354	isorhamnetin	49.6	0.31	P47989
Yinchen	MOL000358	beta-sitosterol	36.91	0.75	P10275
Yinchen	MOL004609	Areapillin	48.96	0.41	P15121
Yinchen	MOL005573	Genkwanin	37.13	0.24	P30542
Yinchen	MOL007274	Skrofulein	30.35	0.3	P15121
Yinchen	MOL008039	Isoarcapillin	57.4	0.41	P15121
Yinchen	MOL008040	Eupalitin	46.11	0.33	Q9UNQ0
Yinchen	MOL008041	Eupatolitin	42.55	0.37	P15121
Yinchen	MOL008043	capillarisin	57.56	0.31	P05067
Yinchen	MOL008045	4'-Methylcapillarisin	72.18	0.35	Q96EB6
Yinchen	MOL008046	Demethoxycapillarisin	52.33	0.25	Q9NPH5
Yinchen	MOL008047	Artepillin A	68.32	0.24	P42330
Yinchen	MOL000098	quercetin	46.43	0.28	Q9NPH5
Huangqin	MOL001689	acacetin	34.97	0.24	Q16678
Huangqin	MOL000173	wogonin	30.68	0.23	P35354
Huangqin	MOL000228	(2R)-7-hydroxy-5-methoxy-2-phenylchroman-4-one	55.23	0.2	Q9UNQ0
Huangqin	MOL002714	baicalein	33.52	0.21	B2RXH2
Huangqin	MOL002908	5,8,2'-Trihydroxy-7-methoxyflavone	37.01	0.27	P15121
Huangqin	MOL002909	5,7,2,5-tetrahydroxy-8,6-dimethoxyflavone	33.82	0.45	P15121
Huangqin	MOL002910	Carthamidin	41.15	0.24	P11511
Huangqin	MOL002911	2,6,2',4'-tetrahydroxy-6'-methoxychaleone	69.04	0.22	P15121
Huangqin	MOL002913	Dihydrobaicalin_qt	40.04	0.21	Q16678
Huangqin	MOL002914	Eriodyctiol (flavanone)	41.35	0.24	P43166
Huangqin	MOL002915	Salvigenin	49.07	0.33	P15121
Huangqin	MOL002917	5,2',6'-Trihydroxy-7,8-dimethoxyflavone	45.05	0.33	P15121
Huangqin	MOL002925	5,7,2',6'-Tetrahydroxyflavone	37.01	0.24	P15121
Huangqin	MOL002926	dihydrooroxylin A	38.72	0.23	P59538
Huangqin	MOL002927	Skullcapflavone II	69.51	0.44	P15121
Huangqin	MOL002928	oroxylin a	41.37	0.23	P36888
Huangqin	MOL002932	Panicolin	76.26	0.29	P15121
Huangqin	MOL002933	5,7,4'-Trihydroxy-8-methoxyflavone	36.56	0.27	P15121
Huangqin	MOL002934	NEOBAICALEIN	104.34	0.44	Q9UNQ0
Huangqin	MOL002937	DIHYDROOROXYLIN	66.06	0.23	P59538
Huangqin	MOL000359	sitosterol	36.91	0.75	P10275
Huangqin	MOL000525	Norwogonin	39.4	0.21	B2RXH2
Huangqin	MOL000552	5,2'-Dihydroxy-6,7,8-trimethoxyflavone	31.71	0.35	P10721
Huangqin	MOL000449	Stigmasterol	43.83	0.76	P10275
Huangqin	MOL001490	bis[(2S)-2-ethylhexyl] benzene-1,2-dicarboxylate	43.59	0.35	P18031
Huangqin	MOL001506	Supraene	33.55	0.42	P34972
Huangqin	MOL002879	Diop	43.59	0.39	Q05655
Huangqin	MOL008206	Moslosooflavone	44.09	0.25	P15121
Huangqin	MOL010415	11,13-Eicosadienoic acid, methyl ester	39.28	0.23	P37231
Huangqin	MOL012245	5,7,4'-trihydroxy-6-methoxyflavanone	36.63	0.27	P59538
Huangqin	MOL012266	rivularin	37.94	0.37	Q16678
Baihuasheshecao	MOL001670	2-methoxy-3-methyl-9,10-anthraquinone	37.83	0.21	P08246
Baihuasheshecao	MOL001663	(4aS,6aR,6aS,6bR,8aR,10R,12aR,14bS)-10-hydroxy-2,2,6a,6b,9,9,12a-heptamethyl-1,3,4,5,6,6a,7,8,8a,10,11,12,13,14b-tetradecahydropicene-4a-carboxylic acid	32.03	0.76	P18031
Baihuasheshecao	MOL001659	Poriferasterol	43.83	0.76	P10275
Baihuasheshecao	MOL001646	2,3-dimethoxy-6-methyanthraquinone	34.86	0.26	P00533
Banlangen	MOL002322	isovitexin	31.29	0.72	P15121
Banlangen	MOL001721	Isaindigodione	60.12	0.41	Q9HC97
Banlangen	MOL001722	2-O-beta-D-glucopyranosyl-2H-1,4-benzoxazin-3(4H)-one	43.62	0.31	P43166
Banlangen	MOL001726	pinoresinol-4-O-beta-D-apiosyl-beta-D-glucopyranoside	36.45	0.51	P35610
Banlangen	MOL001728	3-[ 2′ -( 5′ - hydroxymethyl) furyl ] -1 ( 2H) -isoquinolinone-7-O-BETA-D-glucoside_qt	51.74	0.18	Q02750
Banlangen	MOL001733	EUPATORIN	30.23	0.37	P15121
Banlangen	MOL001734	3-[[(2R,3R,5R,6S)-3,5-dihydroxy-6-(1H-indol-3-yloxy)-4-oxooxan-2-yl]methoxy]-3-oxopropanoic acid	85.87	0.47	P17931
Banlangen	MOL001735	Dinatin	30.97	0.27	P11309
Banlangen	MOL001749	ZINC03860434	43.59	0.35	P18031
Banlangen	MOL001755	24-Ethylcholest-4-en-3-one	36.08	0.76	P18405
Banlangen	MOL001756	quindoline	33.17	0.22	P16083
Banlangen	MOL001767	hydroxyindirubin	63.37	0.3	P49841
Banlangen	MOL001769	beta-sitosterol dodecantate	34.57	0.57	P05093
Banlangen	MOL001771	poriferast-5-en-3beta-ol	36.91	0.75	P10275
Banlangen	MOL001774	Ineketone	37.14	0.3	P11511
Banlangen	MOL001779	Sinoacutine	49.11	0.46	Q96LA8
Banlangen	MOL001781	Indigo	38.2	0.26	P24864 P24941
Banlangen	MOL001782	(2Z)-2-(2-oxoindolin-3-ylidene)indolin-3-one	48.4	0.26	Q15078 Q00535
Banlangen	MOL001783	2-(9-((3-methyl-2-oxopent-3-en-1-yl)oxy)-2-oxo-1,2,8,9-tetrahydrofuro[2,3-h]quinolin-8-yl)propan-2-yl acetate	64	0.57	P30281 P24385 P11802 P30279
Banlangen	MOL001790	Linarin	39.84	0.71	P30542
Banlangen	MOL001792	DFV	32.76	0.18	P11511
Banlangen	MOL001798	neohesperidin_qt	71.17	0.27	Q16678
Banlangen	MOL001800	rosasterol	35.87	0.75	P10275
Banlangen	MOL001803	Sinensetin	50.56	0.45	Q9UNQ0
Banlangen	MOL001804	Stigmasta-5,22-diene-3beta,7alpha-diol	43.04	0.82	P04035
Banlangen	MOL001806	Stigmasta-5,22-diene-3beta,7beta-diol	42.56	0.83	P04035
Banlangen	MOL001810	6-(3-oxoindolin-2-ylidene)indolo[2,1-b]quinazolin-12-one	45.28	0.89	Q9Y233
Banlangen	MOL001814	(E)-3-(3,5-dimethoxy-4-hydroxy-benzylidene)-2-indolinone	57.18	0.25	P00374
Banlangen	MOL001833	Glucobrassicin-1-Sulfonate_qt	42.52	0.24	Q15078 Q00535
Banlangen	MOL000953	CLR	37.87	0.68	P10275
Banbianlian	MOL011678	(3S,8S,9S,10R,13R,14S,17R)-17-[(1S,4R)-4-ethyl-1,5-dimethylhexyl]-10,13-dimethyl-2,3,4,7,8,9,11,12,14,15,16,17-dodecahydro-1H-cyclopenta[a]phenanthren-3-ol	36.91	0.75	P10275
Banbianlian	MOL012207	lobelanidine	60.53	0.32	P31645
Banbianlian	MOL012208	Lobelanine	54.13	0.32	Q01959
Banbianlian	MOL012209	2-[(2R,6S)-6-[(2R)-2-hydroxy-2-phenylethyl]-1-methylpiperidin-2-yl]-1-phenylethanone	45.53	0.32	Q05940
Banbianlian	MOL012216	norlobelanine	64.08	0.3	Q01959
Banbianlian	MOL012225	3-[(2S,3R)-2-(4-hydroxy-3-methoxy-phenyl)-3-(hydroxymethyl)-7-methoxy-2,3-dihydrobenzofuran-5-yl]propyl acetate	73.08	0.54	P21554
Banbianlian	MOL009653	Cycloeucalenol	39.73	0.79	P28845
Banbianlian	MOL002341	Hesperetin	70.31	0.27	P43166
Banbianlian	MOL002881	Diosmetin	31.14	0.27	P33527
Banbianlian	MOL003044	Chryseriol	35.85	0.27	P33527
Banbianlian	MOL000422	kaempferol	41.88	0.24	Q9NPH5
Banbianlian	MOL005530	Hydroxygenkwanin	36.47	0.27	P00747
Banbianlian	MOL000006	luteolin	36.16	0.25	Q9NPH5
Banbianlian	MOL009009	(+)-medioresinol	87.19	0.62	P09917
Huoxiang	MOL005923	3,23-dihydroxy-12-oleanen-28-oic acid	30.86	0.86	Q99808
Huoxiang	MOL005916	irisolidone	37.78	0.3	P00533
Huoxiang	MOL005884	patchoulan 1,12-diol	38.17	0.25	P16662
Huoxiang	MOL005922	Acanthoside B	43.35	0.77	P30542
Huoxiang	MOL005921	quercetin 7-O-β-D-glucoside	49.57	0.27	P56817
Huoxiang	MOL005911	5-Hydroxy-7,4'-dimethoxyflavanon	51.54	0.27	Q9UNQ0
Huoxiang	MOL005890	pachypodol	75.06	0.4	P21728
Banzhilian	MOL001040	(2R)-5,7-dihydroxy-2-(4-hydroxyphenyl)chroman-4-one	42.36	0.21	P11511
Banzhilian	MOL012246	5,7,4'-trihydroxy-8-methoxyflavanone	74.24	0.26	P59538
Banzhilian	MOL012248	5-hydroxy-7,8-dimethoxy-2-(4-methoxyphenyl)chromone	65.82	0.33	P41143
Banzhilian	MOL012250	7-hydroxy-5,8-dimethoxy-2-phenyl-chromone	43.72	0.25	P35228
Banzhilian	MOL012251	Chrysin-5-methylether	37.27	0.2	Q9UNQ0
Banzhilian	MOL012252	9,19-cyclolanost-24-en-3-ol	38.69	0.78	P10275
Banzhilian	MOL002776	Baicalin	40.12	0.75	P15121
Banzhilian	MOL012254	campesterol	37.58	0.71	P10275
Banzhilian	MOL001973	Sitosteryl acetate	40.39	0.85	P11511
Banzhilian	MOL012269	Stigmasta-5,22-dien-3-ol-acetate	46.44	0.86	P05093
Banzhilian	MOL012270	Stigmastan-3,5,22-triene	45.03	0.71	P03372
Banzhilian	MOL002719	6-Hydroxynaringenin	33.23	0.24	P11511
Banzhilian	MOL000351	Rhamnazin	47.14	0.34	P47989
Banzhilian	MOL005190	eriodictyol	71.79	0.24	P43166
Banzhilian	MOL005869	daucostero_qt	36.91	0.75	P10275
Kushen	MOL001484	Inermine	75.18	0.54	P16050
Kushen	MOL003542	8-Isopentenyl-kaempferol	38.04	0.39	O76074
Kushen	MOL003627	sophocarpine	64.26	0.25	P31213
Kushen	MOL003648	Inermin	65.83	0.54	P16050
Kushen	MOL003673	Wighteone	42.8	0.36	P18031
Kushen	MOL003676	Sophoramine	42.16	0.25	P43681 P17787
Kushen	MOL003680	sophoridine	60.07	0.25	P43681 P17787
Kushen	MOL000392	formononetin	69.67	0.21	P60568
Kushen	MOL004941	(2R)-7-hydroxy-2-(4-hydroxyphenyl)chroman-4-one	71.12	0.18	P11511
Kushen	MOL005100	5,7-dihydroxy-2-(3-hydroxy-4-methoxyphenyl)chroman-4-one	47.74	0.27	P43166
Kushen	MOL005944	matrine	63.77	0.25	P43681 P17787
Kushen	MOL006561	(+)-14alpha-hydroxymatrine	35.73	0.29	P36544
Kushen	MOL006562	(+)-7,11-dehydromatrine,(leontalbinine)	62.08	0.25	P08173
Kushen	MOL006563	(+)-9alpha-hydroxymatrine	32.04	0.29	P43681 P17787
Kushen	MOL006564	(+)-allomatrine	58.87	0.25	P43681 P17787
Kushen	MOL006565	AIDS211310	68.68	0.25	P43681 P17787
Kushen	MOL006566	(+)-lehmannine	58.34	0.25	P08173
Kushen	MOL006568	isosophocarpine	61.57	0.25	P31213
Kushen	MOL006569	(-)-14beta-hydroxymatrine	37.26	0.29	P36544
Kushen	MOL006570	(-)-9alpha-hydroxysophoramine	35.23	0.29	Q12809
Kushen	MOL006571	anagyrine	62.01	0.24	P43681 P17787
Kushen	MOL006572	1,4-diazaindan-type,alkaloid,flavascensine	34.64	0.24	P04150
Kushen	MOL006573	13,14-dehydrosophoridine	65.34	0.25	P31213
Kushen	MOL006582	5α,9α-dihydroxymatrine	40.93	0.32	P04066
Kushen	MOL006583	7,11-dehydromatrine	44.43	0.25	P08173
Kushen	MOL006596	Glyceollin	97.27	0.76	P18031
Kushen	MOL003347	hyperforin	44.03	0.6	O75469
Kushen	MOL006604	(2S)-7-hydroxy-2-(4-hydroxyphenyl)-5-methoxy-8-(3-methylbut-2-enyl)chroman-4-one	48.09	0.39	P03372
Kushen	MOL006613	kushenin	47.62	0.38	P03372
Kushen	MOL006619	kushenol J	51.39	0.74	P11511
Kushen	MOL006620	kushenol J_qt	50.86	0.24	P45452
Kushen	MOL006622	kushenol O	42.41	0.76	P05091
Kushen	MOL006623	kushenol,t	51.28	0.64	P56817
Kushen	MOL006626	leachianone,g	60.97	0.4	P11511
Kushen	MOL006627	Lehmanine	62.23	0.25	P08173
Kushen	MOL006628	(+)-Lupanine	52.71	0.24	P43681 P17787
Kushen	MOL006630	Norartocarpetin	54.93	0.24	P15121
Kushen	MOL000456	Phaseolin	78.2	0.73	P18031
Kushen	MOL006649	sophranol	55.42	0.28	P43681 P17787
Kushen	MOL006650	(-)-Maackiain-3-O-glucosyl-6'-O-malonate	48.69	0.52	P60842
Kushen	MOL006652	trifolrhizin	48.53	0.74	Q99808
Huanglian	MOL001454	berberine	36.86	0.78	Q05940
Huanglian	MOL013352	Obacunone	43.29	0.77	P41145
Huanglian	MOL002894	berberrubine	35.74	0.73	Q05940
Huanglian	MOL002897	epiberberine	43.09	0.78	Q05940
Huanglian	MOL002903	(R)-Canadine	55.37	0.77	P21728
Huanglian	MOL002904	Berlambine	36.68	0.82	P41595
Huanglian	MOL002907	Corchoroside A_qt	104.95	0.78	P54707
Huanglian	MOL000622	Magnograndiolide	63.71	0.19	P35354
Huanglian	MOL000762	Palmidin A	35.36	0.65	O75365
Huanglian	MOL000785	palmatine	64.6	0.65	P22303
Huanglian	MOL001458	coptisine	30.67	0.86	Q05940
Huanglian	MOL002668	Worenine	45.83	0.87	P35348
Huanglian	MOL008647	Moupinamide	86.71	0.26	P14780
Jiaogulan	MOL000338	3'-methyleriodictyol	51.61	0.27	Q16678
Jiaogulan	MOL004350	Ruvoside_qt	36.12	0.76	P54707
Jiaogulan	MOL004355	Spinasterol	42.98	0.76	P10275
Jiaogulan	MOL005438	campesterol	37.58	0.71	P10275
Jiaogulan	MOL005440	Isofucosterol	43.78	0.76	Q13133
Jiaogulan	MOL009855	(24S)-Ethylcholesta-5,22,25-trans-3beta-ol	46.91	0.76	P10275
Jiaogulan	MOL009867	4α,14α-dimethyl-5α-ergosta-7,9(11),24(28)-trien-3β-ol	46.29	0.76	P10275
Jiaogulan	MOL009878	Cyclobuxine	84.48	0.7	P32246
Jiaogulan	MOL009888	Gypenoside XXXVI_qt	37.85	0.78	P28845
Peilan	MOL000588	9-acetoxy-8,10-epoxy-6-hydroxythymol 3-O-angelate	61.44	0.21	P48736
Peilan	MOL000592	Dammaradienyl acetate	46.52	0.82	P59538
Peilan	MOL000596	[(3S,4aR,6aR,6aR,6bR,8aR,12S,12aR,14aR,14bR)-4,4,6a,6b,8a,12,14b-heptamethyl-11-methylene-1,2,3,4a,5,6,6a,7,8,9,10,12,12a,13,14,14a-hexadecahydropicen-3-yl] acetate	43.08	0.74	P28845
