# Supplementary material for: Integrating Network Pharmacology and Experimental Validation to Investigate the Mechanisms of Huazhuojiedu Decoction to Treat Chronic Atrophic Gastritis
Source: Evid Based Complement Alternat Med. 2020 Dec 7;2020:2638362. doi: 10.1155/2020/2638362 (PMC7735863; doi:10.1155/2020/2638362)
Supplement: Supplementary Materials — Table S1: information pertaining to the 180 active compounds of HZJD decoction. Table S2: information pertaining to the 1249 targets of HZJD decoction. Table S3: the 575 significant genes associated with CAG. Table S4: the 156 potential targets for the ingredients of HZJD decoction in CAG treatment. Figure 1: PPI network of 155 common targets. The higher the degree, the redder the color, demonstrating the key targets for the treatment of CAG. Figure 2: herb-target-pathway network of HZJD decoction acting on CAG. The blue nodes represent herbs, the red nodes represent targets, and the gray nodes represent pathways. [file 2638362.f1.zip › Supplementary Materials/Supplementary Table S2.xlsx]

## Sheet: 1249
Table S2: Information pertaining to the 1249 targets of HZJD decoction
Mol ID	Molecule Name	Target	Common name	Uniprot ID
MOL000354	isorhamnetin	Xanthine dehydrogenase	XDH	P47989
MOL000354	isorhamnetin	Carbonic anhydrase II	CA2	P00918
MOL000354	isorhamnetin	Carbonic anhydrase VII	CA7	P43166
MOL000354	isorhamnetin	Carbonic anhydrase XII	CA12	O43570
MOL000354	isorhamnetin	Carbonic anhydrase IV	CA4	P22748
MOL000354	isorhamnetin	Cytochrome P450 1B1	CYP1B1	Q16678
MOL000354	isorhamnetin	Multidrug resistance-associated protein 1	ABCC1	P33527
MOL000354	isorhamnetin	NADPH oxidase 4	NOX4	Q9NPH5
MOL000354	isorhamnetin	Aldose reductase	AKR1B1	P15121
MOL000354	isorhamnetin	ATP-binding cassette sub-family G member 2	ABCG2	Q9UNQ0
MOL000354	isorhamnetin	Insulin-like growth factor I receptor	IGF1R	P08069
MOL000354	isorhamnetin	Epidermal growth factor receptor erbB1	EGFR	P00533
MOL000354	isorhamnetin	Acetylcholinesterase	ACHE	P22303
MOL000354	isorhamnetin	Arachidonate 15-lipoxygenase	ALOX15	P16050
MOL000354	isorhamnetin	Arachidonate 12-lipoxygenase	ALOX12	P18054
MOL000354	isorhamnetin	Vasopressin V2 receptor	AVPR2	P30518
MOL000354	isorhamnetin	Monoamine oxidase A	MAOA	P21397
MOL000354	isorhamnetin	Tyrosine-protein kinase receptor FLT3	FLT3	P36888
MOL000354	isorhamnetin	Cytochrome P450 19A1	CYP19A1	P11511
MOL000354	isorhamnetin	Thrombin	F2	P00734
MOL000354	isorhamnetin	Serine/threonine-protein kinase PIM1	PIM1	P11309
MOL000354	isorhamnetin	Arachidonate 5-lipoxygenase	ALOX5	P09917
MOL000354	isorhamnetin	Serine/threonine-protein kinase Aurora-B	AURKB	Q96GD4
MOL000354	isorhamnetin	Dopamine D4 receptor	DRD4	P21917
MOL000354	isorhamnetin	Adenosine A1 receptor (by homology)	ADORA1	P30542
MOL000354	isorhamnetin	Glyoxalase I	GLO1	Q04760
MOL000354	isorhamnetin	Myeloperoxidase	MPO	P05164
MOL000354	isorhamnetin	PI3-kinase p85-alpha subunit	PIK3R1	P27986
MOL000354	isorhamnetin	Adenosine A2a receptor (by homology)	ADORA2A	P29274
MOL000354	isorhamnetin	Death-associated protein kinase 1	DAPK1	P53355
MOL000354	isorhamnetin	Liver glycogen phosphorylase	PYGL	P06737
MOL000354	isorhamnetin	Carbonic anhydrase I	CA1	P00915
MOL000354	isorhamnetin	Glycogen synthase kinase-3 beta	GSK3B	P49841
MOL000354	isorhamnetin	Tyrosine-protein kinase SRC	SRC	P12931
MOL000354	isorhamnetin	Focal adhesion kinase 1	PTK2	Q05397
MOL000354	isorhamnetin	Estradiol 17-beta-dehydrogenase 2	HSD17B2	P37059
MOL000354	isorhamnetin	Vascular endothelial growth factor receptor 2	KDR	P35968
MOL000354	isorhamnetin	Matrix metalloproteinase 13	MMP13	P45452
MOL000354	isorhamnetin	Matrix metalloproteinase 3	MMP3	P08254
MOL000354	isorhamnetin	Carbonic anhydrase III	CA3	P07451
MOL000354	isorhamnetin	Serine/threonine-protein kinase PLK1	PLK1	P53350
MOL000354	isorhamnetin	Carbonic anhydrase VI	CA6	P23280
MOL000354	isorhamnetin	Cyclin-dependent kinase 1	CDK1	P06493
MOL000354	isorhamnetin	Matrix metalloproteinase 9	MMP9	P14780
MOL000354	isorhamnetin	Matrix metalloproteinase 2	MMP2	P08253
MOL000354	isorhamnetin	Protein kinase N1	PKN1	Q16512
MOL000354	isorhamnetin	Carbonic anhydrase XIV	CA14	Q9ULX7
MOL000354	isorhamnetin	Carbonic anhydrase IX	CA9	Q16790
MOL000354	isorhamnetin	Casein kinase II alpha	CSNK2A1	P68400
MOL000354	isorhamnetin	Hepatocyte growth factor receptor	MET	P08581
MOL000354	isorhamnetin	Serine/threonine-protein kinase NEK2	NEK2	P51955
MOL000354	isorhamnetin	Interleukin-8 receptor A	CXCR1	P25024
MOL000354	isorhamnetin	CaM kinase II beta	CAMK2B	Q13554
MOL000354	isorhamnetin	ALK tyrosine kinase receptor	ALK	Q9UM73
MOL000354	isorhamnetin	Serine/threonine-protein kinase AKT	AKT1	P31749
MOL000354	isorhamnetin	P-glycoprotein 1	ABCB1	P08183
MOL000354	isorhamnetin	Serine/threonine-protein kinase NEK6	NEK6	Q9HC98
MOL000354	isorhamnetin	Phospholipase A2 group 1B	PLA2G1B	P04054
MOL000354	isorhamnetin	Carbonic anhydrase VA	CA5A	P35218
MOL000354	isorhamnetin	Beta-secretase 1	BACE1	P56817
MOL000354	isorhamnetin	Tyrosine-protein kinase receptor UFO	AXL	P30530
MOL000354	isorhamnetin	NUAK family SNF1-like kinase 1	NUAK1	O60285
MOL000354	isorhamnetin	Aldo-keto reductase family 1 member C2 (by homology)	AKR1C2	P52895
MOL000354	isorhamnetin	Aldo-keto reductase family 1 member C1 (by homology)	AKR1C1	Q04828
MOL000354	isorhamnetin	Aldo-keto-reductase family 1 member C3 (by homology)	AKR1C3	P42330
MOL000354	isorhamnetin	Aldo-keto reductase family 1 member C4 (by homology)	AKR1C4	P17516
MOL000354	isorhamnetin	Carbonic anhydrase XIII (by homology)	CA13	Q8N1Q1
MOL000354	isorhamnetin	Aldehyde reductase (by homology)	AKR1A1	P14550
MOL000354	isorhamnetin	G-protein coupled receptor 35	GPR35	Q9HC97
MOL000354	isorhamnetin	Microtubule-associated protein tau	MAPT	P10636
MOL000354	isorhamnetin	Lysine-specific demethylase 4D-like	KDM4E	B2RXH2
MOL000354	isorhamnetin	DNA topoisomerase II alpha	TOP2A	P11388
MOL000354	isorhamnetin	Insulin receptor	INSR	P06213
MOL000354	isorhamnetin	Myosin light chain kinase, smooth muscle	MYLK	Q15746
MOL000354	isorhamnetin	Tyrosine-protein kinase SYK	SYK	P43405
MOL000354	isorhamnetin	PI3-kinase p110-gamma subunit	PIK3CG	P48736
MOL000354	isorhamnetin	DNA-(apurinic or apyrimidinic site) lyase	APEX1	P27695
MOL000354	isorhamnetin	Cyclin-dependent kinase 5/CDK5 activator 1	CDK5R1 CDK5	Q15078 Q00535
MOL000354	isorhamnetin	Cyclin-dependent kinase 1/cyclin B	CCNB3 CDK1 CCNB1 CCNB2	Q8WWL7 P06493 P14635 O95067
MOL000354	isorhamnetin	Cyclin-dependent kinase 6	CDK6	Q00534
MOL000354	isorhamnetin	Cyclin-dependent kinase 2	CDK2	P24941
MOL000354	isorhamnetin	Arginase-1 (by homology)	ARG1	P05089
MOL000354	isorhamnetin	Beta amyloid A4 protein	APP	P05067
MOL000354	isorhamnetin	Induced myeloid leukemia cell differentiation protein Mcl-1	MCL1	Q07820
MOL000354	isorhamnetin	Telomerase reverse transcriptase	TERT	O14746
MOL000354	isorhamnetin	Tyrosinase	TYR	P14679
MOL000354	isorhamnetin	Estradiol 17-beta-dehydrogenase 1	HSD17B1	P14061
MOL000354	isorhamnetin	Aryl hydrocarbon receptor	AHR	P35869
MOL000354	isorhamnetin	Estrogen-related receptor alpha	ESRRA	P11474
MOL000354	isorhamnetin	Receptor-type tyrosine-protein phosphatase S	PTPRS	Q13332
MOL000354	isorhamnetin	Plasminogen	PLG	P00747
MOL000354	isorhamnetin	Estrogen receptor beta	ESR2	Q92731
MOL000354	isorhamnetin	DNA-3-methyladenine glycosylase	MPG	P29372
MOL000354	isorhamnetin	Solute carrier family 22 member 12	SLC22A12	Q96S37
MOL000354	isorhamnetin	Poly [ADP-ribose] polymerase-1	PARP1	P09874
MOL000354	isorhamnetin	Transthyretin	TTR	P02766
MOL000354	isorhamnetin	Matrix metalloproteinase 12	MMP12	P39900
MOL000354	isorhamnetin	Lymphocyte differentiation antigen CD38	CD38	P28907
MOL000354	isorhamnetin	Aldo-keto reductase family 1 member B10	AKR1B10	O60218
MOL000354	isorhamnetin	Tankyrase-2	TNKS2	Q9H2K2
MOL000358	beta-sitosterol	Androgen Receptor	AR	P10275
MOL000358	beta-sitosterol	HMG-CoA reductase	HMGCR	P04035
MOL000358	beta-sitosterol	Cytochrome P450 51 (by homology)	CYP51A1	Q16850
MOL000358	beta-sitosterol	Niemann-Pick C1-like protein 1	NPC1L1	Q9UHC9
MOL000358	beta-sitosterol	LXR-alpha	NR1H3	Q13133
MOL000358	beta-sitosterol	Cytochrome P450 17A1	CYP17A1	P05093
MOL000358	beta-sitosterol	Nuclear receptor ROR-gamma	RORC	P51449
MOL000358	beta-sitosterol	Estrogen receptor alpha	ESR1	P03372
MOL000358	beta-sitosterol	Sterol regulatory element-binding protein 2	SREBF2	Q12772
MOL000358	beta-sitosterol	Testis-specific androgen-binding protein	SHBG	P04278
MOL000358	beta-sitosterol	Norepinephrine transporter	SLC6A2	P23975
MOL000358	beta-sitosterol	Cytochrome P450 2C19	CYP2C19	P33261
MOL000358	beta-sitosterol	Nuclear receptor ROR-alpha	RORA	P35398
MOL000358	beta-sitosterol	Protein-tyrosine phosphatase 1B	PTPN1	P18031
MOL000358	beta-sitosterol	Butyrylcholinesterase	BCHE	P06276
MOL000358	beta-sitosterol	Corticosteroid binding globulin	SERPINA6	P08185
MOL000358	beta-sitosterol	Serotonin transporter	SLC6A4	P31645
MOL000358	beta-sitosterol	Muscarinic acetylcholine receptor M2	CHRM2	P08172
MOL000358	beta-sitosterol	Vitamin D receptor	VDR	P11473
MOL000358	beta-sitosterol	Glucose-6-phosphate 1-dehydrogenase	G6PD	P11413
MOL000358	beta-sitosterol	LXR-beta	NR1H2	P55055
MOL000358	beta-sitosterol	Glycine receptor subunit alpha-1	GLRA1	P23415
MOL000358	beta-sitosterol	Carboxylesterase 2	CES2	O00748
MOL000358	beta-sitosterol	Prostanoid EP1 receptor (by homology)	PTGER1	P34995
MOL000358	beta-sitosterol	Prostanoid EP2 receptor (by homology)	PTGER2	P43116
MOL000358	beta-sitosterol	11-beta-hydroxysteroid dehydrogenase 1	HSD11B1	P28845
MOL000358	beta-sitosterol	Prostaglandin E synthase	PTGES	O14684
MOL000358	beta-sitosterol	Dual specificity phosphatase Cdc25A	CDC25A	P30304
MOL000358	beta-sitosterol	Peroxisome proliferator-activated receptor alpha	PPARA	Q07869
MOL000358	beta-sitosterol	Peroxisome proliferator-activated receptor delta	PPARD	Q03181
MOL000358	beta-sitosterol	Anti-estrogen binding site (AEBS) (by homology)	DHCR7	Q9UBM7
MOL000358	beta-sitosterol	Squalene monooxygenase	SQLE	Q14534
MOL000358	beta-sitosterol	Protein-tyrosine phosphatase 1C	PTPN6	P29350
MOL000358	beta-sitosterol	Nuclear receptor subfamily 1 group I member 3	NR1I3	Q14994
MOL000358	beta-sitosterol	Squalene synthetase (by homology)	FDFT1	P37268
MOL000358	beta-sitosterol	Sigma opioid receptor	SIGMAR1	Q99720
MOL000358	beta-sitosterol	Nitric oxide synthase, inducible (by homology)	NOS2	P35228
MOL000358	beta-sitosterol	Glucocorticoid receptor	NR3C1	P04150
MOL000358	beta-sitosterol	Peroxisome proliferator-activated receptor gamma	PPARG	P37231
MOL000358	beta-sitosterol	Dual specificity phosphatase Cdc25B	CDC25B	P30305
MOL000358	beta-sitosterol	UDP-glucuronosyltransferase 2B7	UGT2B7	P16662
MOL000358	beta-sitosterol	11-beta-hydroxysteroid dehydrogenase 2	HSD11B2	P80365
MOL000358	beta-sitosterol	DNA polymerase beta (by homology)	POLB	P06746
MOL000358	beta-sitosterol	Prolyl endopeptidase	PREP	P48147
MOL000358	beta-sitosterol	Prostanoid EP4 receptor (by homology)	PTGER4	P35408
MOL000358	beta-sitosterol	Indoleamine 2,3-dioxygenase	IDO1	P14902
MOL000358	beta-sitosterol	Dopamine D2 receptor	DRD2	P14416
MOL000358	beta-sitosterol	Thromboxane-A synthase	TBXAS1	P24557
MOL000358	beta-sitosterol	Potassium-transporting ATPase alpha chain 2	ATP12A	P54707
MOL000358	beta-sitosterol	Protein Mdm4	MDM4	O15151
MOL000358	beta-sitosterol	p53-binding protein Mdm-2	MDM2	Q00987
MOL000358	beta-sitosterol	Prostanoid IP receptor	PTGIR	P43119
MOL000358	beta-sitosterol	Anti-estrogen binding site (AEBS)	DHCR7 EBP	Q9UBM7 Q15125
MOL000358	beta-sitosterol	Fatty acid binding protein adipocyte	FABP4	P15090
MOL000358	beta-sitosterol	Fatty acid binding protein muscle	FABP3	P05413
MOL000358	beta-sitosterol	Fatty acid binding protein epidermal	FABP5	Q01469
MOL000358	beta-sitosterol	Fatty acid-binding protein, liver	FABP1	P07148
MOL000358	beta-sitosterol	Adenosine A3 receptor	ADORA3	P0DMS8
MOL000358	beta-sitosterol	MAP kinase ERK1	MAPK3	P27361
MOL000358	beta-sitosterol	Protein-tyrosine phosphatase 2C	PTPN11	Q06124
MOL000358	beta-sitosterol	Protein kinase C gamma	PRKCG	P05129
MOL000358	beta-sitosterol	Protein kinase C delta	PRKCD	Q05655
MOL000358	beta-sitosterol	Protein kinase C beta	PRKCB	P05771
MOL000358	beta-sitosterol	Protein kinase C epsilon	PRKCE	Q02156
MOL000358	beta-sitosterol	Protein kinase C theta	PRKCQ	Q04759
MOL000358	beta-sitosterol	Receptor-type tyrosine-protein phosphatase F (LAR)	PTPRF	P10586
MOL000358	beta-sitosterol	Low molecular weight phosphotyrosine protein phosphatase	ACP1	P24666
MOL000358	beta-sitosterol	Acyl-CoA desaturase	SCD	O00767
MOL000358	beta-sitosterol	Monoglyceride lipase	MGLL	Q99685
MOL000358	beta-sitosterol	C-C chemokine receptor type 1	CCR1	P32246
MOL000358	beta-sitosterol	GABA-B receptor (by homology)	GABBR1	Q9UBS5
MOL000358	beta-sitosterol	Beta secretase 2	BACE2	Q9Y5Z0
MOL000358	beta-sitosterol	MAP kinase p38 alpha	MAPK14	Q16539
MOL000358	beta-sitosterol	Coagulation factor XI	F11	P03951
MOL000358	beta-sitosterol	Prostanoid FP receptor	PTGFR	P43088
MOL000358	beta-sitosterol	Prostanoid EP3 receptor	PTGER3	P43115
MOL000358	beta-sitosterol	Prostanoid DP receptor	PTGDR	Q13258
MOL000358	beta-sitosterol	DNA topoisomerase I	TOP1	P11387
MOL000358	beta-sitosterol	Hypoxia-inducible factor 1 alpha	HIF1A	Q16665
MOL000358	beta-sitosterol	Acetyl-CoA carboxylase 2	ACACB	O00763
MOL000358	beta-sitosterol	Protein kinase C eta	PRKCH	P24723
MOL000358	beta-sitosterol	T-cell protein-tyrosine phosphatase	PTPN2	P17706
MOL000358	beta-sitosterol	Neurokinin 1 receptor	TACR1	P25103
MOL000358	beta-sitosterol	Melatonin receptor 1A	MTNR1A	P48039
MOL000358	beta-sitosterol	Melatonin receptor 1B	MTNR1B	P49286
MOL000358	beta-sitosterol	Neuropeptide Y receptor type 5 (by homology)	NPY5R	Q15761
MOL000358	beta-sitosterol	Solute carrier family 22 member 6 (by homology)	SLC22A6	Q4U2R8
MOL000358	beta-sitosterol	Mitogen-activated protein kinase kinase kinase 14	MAP3K14	Q99558
MOL004609	Areapillin	Delta opioid receptor	OPRD1	P41143
MOL004609	Areapillin	Ornithine decarboxylase	ODC1	P11926
MOL004609	Areapillin	Phospholipase A2 group IIA	PLA2G2A	P14555
MOL004609	Areapillin	Tankyrase-1	TNKS	O95271
MOL004609	Areapillin	AMY1C	AMY1A	P04745
MOL004609	Areapillin	G protein-coupled receptor kinase 6	GRK6	P43250
MOL004609	Areapillin	Stem cell growth factor receptor	KIT	P10721
MOL004609	Areapillin	Mu opioid receptor (by homology)	OPRM1	P35372
MOL004609	Areapillin	Cystic fibrosis transmembrane conductance regulator	CFTR	P13569
MOL004609	Areapillin	NEDD8-activating enzyme E1 regulatory subunit	NAE1	Q13564
MOL004609	Areapillin	Cyclooxygenase-2	PTGS2	P35354
MOL004609	Areapillin	Beta-galactoside alpha-2,6-sialyltransferase 1	ST6GAL1	P15907
MOL005573	Genkwanin	Tyrosine-protein kinase LCK	LCK	P06239
MOL005573	Genkwanin	Monoamine oxidase B	MAOB	P27338
MOL005573	Genkwanin	Carbonyl reductase [NADPH] 1	CBR1	P16152
MOL005573	Genkwanin	6-phosphofructo-2-kinase/fructose-2,6-bisphosphatase 3	PFKFB3	Q16875
MOL005573	Genkwanin	Neurotrophic tyrosine kinase receptor type 2	NTRK2	Q16620
MOL007274	Skrofulein	Taste receptor type 2 member 31	TAS2R31	P59538
MOL007274	Skrofulein	Calmodulin	CALM1	P62158
MOL008043	capillarisin	Heat shock protein HSP 90-beta	HSP90AB1	P08238
MOL008043	capillarisin	Endoplasmin	HSP90B1	P14625
MOL008043	capillarisin	Phosphodiesterase 4D	PDE4D	Q08499
MOL008043	capillarisin	Heat shock 70 kDa protein 1	HSPA1A	P0DMV8
MOL008043	capillarisin	Thyroid hormone receptor alpha	THRA	P10827
MOL008043	capillarisin	Thyroid hormone receptor beta-1	THRB	P10828
MOL008043	capillarisin	Lysine-specific demethylase 4C	KDM4C	Q9H3R0
MOL008043	capillarisin	Trypsin I	PRSS1	P07477
MOL008043	capillarisin	Thrombin and coagulation factor X	F10	P00742
MOL008043	capillarisin	Urokinase-type plasminogen activator	PLAU	P00749
MOL008043	capillarisin	Phosphodiesterase 5A	PDE5A	O76074
MOL008043	capillarisin	Protein kinase C alpha	PRKCA	P17252
MOL008043	capillarisin	Heat shock protein HSP 90-alpha	HSP90AA1	P07900
MOL008043	capillarisin	Insulin-like growth factor binding protein 6	IGFBP6	P24592
MOL008043	capillarisin	Insulin-like growth factor binding protein 4	IGFBP4	P22692
MOL008043	capillarisin	Insulin-like growth factor binding protein 5	IGFBP5	P24593
MOL008043	capillarisin	Insulin-like growth factor binding protein 2	IGFBP2	P18065
MOL008043	capillarisin	Insulin-like growth factor binding protein 3	IGFBP3	P17936
MOL008043	capillarisin	Insulin-like growth factor binding protein 1	IGFBP1	P08833
MOL008043	capillarisin	Heat shock cognate 71 kDa protein	HSPA8	P11142
MOL008043	capillarisin	Alpha-synuclein	SNCA	P37840
MOL008043	capillarisin	Histone deacetylase 1	HDAC1	Q13547
MOL008043	capillarisin	Calcium-activated potassium channel subunit alpha-1	KCNMA1	Q12791
MOL008043	capillarisin	PI3-kinase p110-alpha subunit	PIK3CA	P42336
MOL008043	capillarisin	NAD-dependent deacetylase sirtuin 1	SIRT1	Q96EB6
MOL008043	capillarisin	AMP-activated protein kinase, alpha-1 subunit (by homology)	PRKAA1	Q13131
MOL008043	capillarisin	Leukocyte elastase	ELANE	P08246
MOL008043	capillarisin	Troponin, cardiac muscle	TNNC1 TNNT2 TNNI3	P63316 P45379 P19429
MOL008043	capillarisin	Dual specificity protein phosphatase 3	DUSP3	P51452
MOL008043	capillarisin	Histone deacetylase 3	HDAC3	O15379
MOL008043	capillarisin	Histone deacetylase 6	HDAC6	Q9UBN7
MOL008043	capillarisin	Histone deacetylase 2	HDAC2	Q92769
MOL008043	capillarisin	Histone deacetylase 8	HDAC8	Q9BY41
MOL008043	capillarisin	Histone deacetylase 10	HDAC10	Q969S8
MOL008043	capillarisin	Catechol O-methyltransferase	COMT	P21964
MOL008043	capillarisin	Matrix metalloproteinase 1	MMP1	P03956
MOL008043	capillarisin	Phosphodiesterase 10A	PDE10A	Q9Y233
MOL008043	capillarisin	Matrix metalloproteinase 8	MMP8	P22894
MOL008043	capillarisin	Interleukin-8 receptor B	CXCR2	P25025
MOL008043	capillarisin	Egl nine homolog 1	EGLN1	Q9GZT9
MOL008043	capillarisin	Corticotropin releasing factor receptor 1	CRHR1	P34998
MOL008043	capillarisin	Dopamine D3 receptor	DRD3	P35462
MOL008043	capillarisin	Glucagon receptor	GCGR	P47871
MOL008043	capillarisin	Serine/threonine-protein kinase Chk1	CHEK1	O14757
MOL008043	capillarisin	Serine/threonine-protein kinase WEE1	WEE1	P30291
MOL008043	capillarisin	MAP kinase signal-integrating kinase 2	MKNK2	Q9HBH9
MOL008043	capillarisin	MAP kinase-interacting serine/threonine-protein kinase MNK1	MKNK1	Q9BUB5
MOL008043	capillarisin	Flap endonuclease 1	FEN1	P39748
MOL008043	capillarisin	Alkaline phosphatase, tissue-nonspecific isozyme	ALPL	P05186
MOL008043	capillarisin	Neurotensin receptor 3	SORT1	Q99523
MOL008045	4'-Methylcapillarisin	Inhibitor of nuclear factor kappa B kinase beta subunit	IKBKB	O14920
MOL008045	4'-Methylcapillarisin	Deoxyribonuclease gamma	DNASE1L3	Q13609
MOL008045	4'-Methylcapillarisin	DNA excision repair protein ERCC-5	ERCC5	P28715
MOL008045	4'-Methylcapillarisin	Protein farnesyltransferase	FNTA FNTB	P49354 P49356
MOL008045	4'-Methylcapillarisin	Metastin receptor	KISS1R	Q969F8
MOL008045	4'-Methylcapillarisin	Ribosomal protein S6 kinase alpha 3	RPS6KA3	P51812
MOL008045	4'-Methylcapillarisin	Rho-associated protein kinase 2	ROCK2	O75116
MOL008045	4'-Methylcapillarisin	DNA ligase 1	LIG1	P18858
MOL008045	4'-Methylcapillarisin	Apoptosis regulator Bcl-X	BCL2L1	Q07817
MOL008045	4'-Methylcapillarisin	Apoptosis regulator Bcl-2	BCL2	P10415
MOL008045	4'-Methylcapillarisin	C-C chemokine receptor type 4	CCR4	P51679
MOL008045	4'-Methylcapillarisin	Bromodomain-containing protein 4	BRD4	O60885
MOL008045	4'-Methylcapillarisin	cAMP-dependent protein kinase alpha-catalytic subunit	PRKACA	P17612
MOL008045	4'-Methylcapillarisin	Fructose-1,6-bisphosphatase	FBP1	P09467
MOL008045	4'-Methylcapillarisin	Thrombopoietin receptor	MPL	P40238
MOL008045	4'-Methylcapillarisin	Leucine-rich repeat serine/threonine-protein kinase 2	LRRK2	Q5S007
MOL008045	4'-Methylcapillarisin	G protein-coupled receptor kinase 7	GRK7	Q8WTQ7
MOL008045	4'-Methylcapillarisin	Homeodomain-interacting protein kinase 4	HIPK4	Q8NE63
MOL008045	4'-Methylcapillarisin	Serine/threonine-protein kinase TAO2	TAOK2	Q9UL54
MOL008045	4'-Methylcapillarisin	Serine/threonine-protein kinase MAK	MAK	P20794
MOL008045	4'-Methylcapillarisin	Cyclin-dependent kinase-like 5	CDKL5	O76039
MOL008045	4'-Methylcapillarisin	Serine/threonine-protein kinase ICK	ICK	Q9UPZ9
MOL008045	4'-Methylcapillarisin	Serine/threonine-protein kinase VRK2	VRK2	Q86Y07
MOL008045	4'-Methylcapillarisin	Phosphatidylinositol-5-phosphate 4-kinase type-2 gamma	PIP4K2C	Q8TBX8
MOL008045	4'-Methylcapillarisin	Cyclin-dependent kinase 13	CDK13	Q14004
MOL008045	4'-Methylcapillarisin	Macrophage colony stimulating factor receptor	CSF1R	P07333
MOL008045	4'-Methylcapillarisin	Tyrosine-protein kinase ABL	ABL1	P00519
MOL008045	4'-Methylcapillarisin	Cyclin-dependent kinase 2/cyclin E1	CCNE1 CDK2	P24864 P24941
MOL008045	4'-Methylcapillarisin	Phosphatidylinositol-4-phosphate 5-kinase type-1 gamma	PIP5K1C	O60331
MOL008045	4'-Methylcapillarisin	Dual serine/threonine and tyrosine protein kinase	DSTYK	Q6XUX3
MOL008045	4'-Methylcapillarisin	Platelet-derived growth factor receptor alpha	PDGFRA	P16234
MOL008045	4'-Methylcapillarisin	Ephrin type-A receptor 2	EPHA2	P29317
MOL008045	4'-Methylcapillarisin	GABA-A receptor; alpha-3/beta-3/gamma-2	GABRB3 GABRA3 GABRG2	P28472 P34903 P18507
MOL008045	4'-Methylcapillarisin	GABA-A receptor; alpha-1/beta-3/gamma-2	GABRB3 GABRG2 GABRA1	P28472 P18507 P14867
MOL008046	Demethoxycapillarisin	Maltase-glucoamylase	MGAM	O43451
MOL008046	Demethoxycapillarisin	Serotonin 2a (5-HT2a) receptor	HTR2A	P28223
MOL008046	Demethoxycapillarisin	Serotonin 2c (5-HT2c) receptor	HTR2C	P28335
MOL008046	Demethoxycapillarisin	Estrogen-related receptor beta	ESRRB	O95718
MOL008046	Demethoxycapillarisin	Macrophage migration inhibitory factor	MIF	P14174
MOL008046	Demethoxycapillarisin	Dihydroorotate dehydrogenase (by homology)	DHODH	Q02127
MOL008046	Demethoxycapillarisin	Tissue-type plasminogen activator	PLAT	P00750
MOL008046	Demethoxycapillarisin	CDC7/DBF4 (Cell division cycle 7-related protein kinase/Activator of S phase kinase)	CDC7	O00311
MOL008047	Artepillin A	Cyclooxygenase-1	PTGS1	P23219
MOL008047	Artepillin A	Thromboxane A2 receptor	TBXA2R	P21731
MOL008047	Artepillin A	Inosine-5'-monophosphate dehydrogenase 1	IMPDH1	P20839
MOL008047	Artepillin A	c-Jun N-terminal kinase 1	MAPK8	P45983
MOL008047	Artepillin A	Type-1 angiotensin II receptor (by homology)	AGTR1	P30556
MOL008047	Artepillin A	Dihydrofolate reductase	DHFR	P00374
MOL008047	Artepillin A	Nuclear factor NF-kappa-B p105 subunit	NFKB1	P19838
MOL008047	Artepillin A	Glycogen synthase kinase-3 alpha	GSK3A	P49840
MOL008047	Artepillin A	AMP deaminase 1	AMPD1	P23109
MOL008047	Artepillin A	TGF-beta receptor type I	TGFBR1	P36897
MOL008047	Artepillin A	Lethal(3)malignant brain tumor-like protein 3	L3MBTL3	Q96JM7
MOL008047	Artepillin A	Tyrosine-protein kinase JAK3	JAK3	P52333
MOL008047	Artepillin A	Glutathione reductase	GSR	P00390
MOL008047	Artepillin A	Tyrosine-protein kinase JAK2	JAK2	O60674
MOL008047	Artepillin A	Steryl-sulfatase	STS	P08842
MOL008047	Artepillin A	Dual specificity tyrosine-phosphorylation-regulated kinase 1B	DYRK1B	Q9Y463
MOL008047	Artepillin A	Retinoic acid receptor gamma	RARG	P13631
MOL008047	Artepillin A	Retinoic acid receptor beta	RARB	P10826
MOL008047	Artepillin A	Retinoic acid receptor alpha	RARA	P10276
MOL008047	Artepillin A	AMP deaminase 2	AMPD2	Q01433
MOL008047	Artepillin A	Histamine H1 receptor	HRH1	P35367
MOL008047	Artepillin A	Phosphodiesterase 4A	PDE4A	P27815
MOL008047	Artepillin A	Phosphodiesterase 4B	PDE4B	Q07343
MOL008047	Artepillin A	Phosphodiesterase 4C	PDE4C	Q08493
MOL008047	Artepillin A	Hydroxyacid oxidase 2 (by homology)	HAO2	Q9NYQ3
MOL008047	Artepillin A	Mannose-6-phosphate isomerase	MPI	P34949
MOL008047	Artepillin A	Integrin alpha-V/beta-3	ITGAV ITGB3	P06756 P05106
MOL008047	Artepillin A	Integrin alpha-IIb/beta-3	ITGA2B ITGB3	P08514 P05106
MOL008047	Artepillin A	Integrin alpha-V/beta-5	ITGB5 ITGAV	P18084 P06756
MOL008047	Artepillin A	Integrin alpha-V/beta-1	ITGAV ITGB1	P06756 P05556
MOL008047	Artepillin A	Cyclin-dependent kinase 2/cyclin A	CDK2 CCNA1 CCNA2	P24941 P78396 P20248
MOL008047	Artepillin A	Thyroid hormone receptor	THRB THRA	P10828 P10827
MOL008047	Artepillin A	Kappa Opioid receptor	OPRK1	P41145
MOL008047	Artepillin A	Leukocyte adhesion molecule-1	SELL	P14151
MOL008047	Artepillin A	Selectin E	SELE	P16581
MOL008047	Artepillin A	P-selectin	SELP	P16109
MOL008047	Artepillin A	Cholecystokinin B receptor (by homology)	CCKBR	P32239
MOL008047	Artepillin A	Dipeptidyl peptidase IV	DPP4	P27487
MOL008047	Artepillin A	Prenyl protein specific protease	RCE1	Q9Y256
MOL008047	Artepillin A	Membrane metallo-endopeptidase-like 1	MMEL1	Q495T6
MOL008047	Artepillin A	Dipeptidyl peptidase II	DPP7	Q9UHL4
MOL008047	Artepillin A	Dipeptidyl peptidase VIII	DPP8	Q6V1X1
MOL008047	Artepillin A	Fibroblast activation protein alpha	FAP	Q12884
MOL008047	Artepillin A	Dipeptidyl peptidase IX	DPP9	Q86TI2
MOL008047	Artepillin A	Serine/threonine-protein kinase RAF	RAF1	P04049
MOL008047	Artepillin A	Transforming protein RhoA	RHOA	P61586
MOL008047	Artepillin A	Hematopoietic cell protein-tyrosine phosphatase 70Z-PEP	PTPN22	Q9Y2R2
MOL008047	Artepillin A	AMP deaminase 3	AMPD3	Q01432
MOL008047	Artepillin A	Hydroxycarboxylic acid receptor 2	HCAR2	Q8TDS4
MOL008047	Artepillin A	Tyrosine-protein phosphatase non-receptor type 9	PTPN9	P43378
MOL008047	Artepillin A	Transient receptor potential cation channel subfamily M member 8	TRPM8	Q7Z2W7
MOL008047	Artepillin A	Tyrosine-protein kinase BRK	PTK6	Q13882
MOL008047	Artepillin A	Transketolase	TKT	P29401
MOL008047	Artepillin A	Carnitine O-palmitoyltransferase 1, liver isoform	CPT1A	P50416
MOL008047	Artepillin A	Carnitine O-palmitoyltransferase 1, muscle isoform	CPT1B	Q92523
MOL008047	Artepillin A	Carnitine palmitoyltransferase 2	CPT2	P23786
MOL008047	Artepillin A	Dopamine D1 receptor	DRD1	P21728
MOL008047	Artepillin A	Diacylglycerol O-acyltransferase 1	DGAT1	O75907
MOL008047	Artepillin A	Dual specificty protein kinase CLK1	CLK1	P49759
MOL008047	Artepillin A	Neprilysin (by homology)	MME	P08473
MOL008047	Artepillin A	Carboxypeptidase B	CPB1	P15086
MOL008047	Artepillin A	c-Jun N-terminal kinase 3	MAPK10	P53779
MOL008047	Artepillin A	P2X purinoceptor 3	P2RX3	P56373
MOL008047	Artepillin A	Carboxypeptidase B2 isoform A	CPB2	Q96IY4
MOL008047	Artepillin A	Steroid 5-alpha-reductase 2	SRD5A2	P31213
MOL008047	Artepillin A	Bone morphogenetic protein 1	BMP1	P13497
MOL008047	Artepillin A	Serine/threonine-protein kinase PIM2	PIM2	Q9P1W9
MOL008047	Artepillin A	Epoxide hydratase	EPHX2	P34913
MOL001689	acacetin	Cytochrome P450 1A1	CYP1A1	P04798
MOL001689	acacetin	Cytochrome P450 1A2	CYP1A2	P05177
MOL000228	(2R)-7-hydroxy-5-methoxy-2-phenylchroman-4-one	Metabotropic glutamate receptor 5	GRM5	P41594
MOL000228	(2R)-7-hydroxy-5-methoxy-2-phenylchroman-4-one	Sodium/glucose cotransporter 2	SLC5A2	P31639
MOL000228	(2R)-7-hydroxy-5-methoxy-2-phenylchroman-4-one	Phospholipase A2 group V	PLA2G5	P39877
MOL000228	(2R)-7-hydroxy-5-methoxy-2-phenylchroman-4-one	Acyl coenzyme A:cholesterol acyltransferase	CES1	P23141
MOL000228	(2R)-7-hydroxy-5-methoxy-2-phenylchroman-4-one	Endothelin receptor ET-A	EDNRA	P25101
MOL000228	(2R)-7-hydroxy-5-methoxy-2-phenylchroman-4-one	Kallikrein 1	KLK1	P06870
MOL000228	(2R)-7-hydroxy-5-methoxy-2-phenylchroman-4-one	Kallikrein 2	KLK2	P20151
MOL000228	(2R)-7-hydroxy-5-methoxy-2-phenylchroman-4-one	Plasminogen activator inhibitor-1	SERPINE1	P05121
MOL000228	(2R)-7-hydroxy-5-methoxy-2-phenylchroman-4-one	Group X secretory phospholipase A2	PLA2G10	O15496
MOL000228	(2R)-7-hydroxy-5-methoxy-2-phenylchroman-4-one	C-X-C chemokine receptor type 4	CXCR4	P61073
MOL000228	(2R)-7-hydroxy-5-methoxy-2-phenylchroman-4-one	Retinoid X receptor alpha	RXRA	P19793
MOL000228	(2R)-7-hydroxy-5-methoxy-2-phenylchroman-4-one	Presequence protease, mitochondrial	PITRM1	Q5JRX3
MOL000228	(2R)-7-hydroxy-5-methoxy-2-phenylchroman-4-one	Trace amine-associated receptor 1 (by homology)	TAAR1	Q96RJ0
MOL000228	(2R)-7-hydroxy-5-methoxy-2-phenylchroman-4-one	Serine/threonine-protein kinase/endoribonuclease IRE1	ERN1	O75460
MOL000228	(2R)-7-hydroxy-5-methoxy-2-phenylchroman-4-one	D-amino-acid oxidase	DAO	P14920
MOL000228	(2R)-7-hydroxy-5-methoxy-2-phenylchroman-4-one	MAP kinase-activated protein kinase 2	MAPKAPK2	P49137
MOL000228	(2R)-7-hydroxy-5-methoxy-2-phenylchroman-4-one	Alkaline phosphatase placental-like	ALPG	P10696
MOL000228	(2R)-7-hydroxy-5-methoxy-2-phenylchroman-4-one	Cathepsin (B and K)	CTSB	P07858
MOL000228	(2R)-7-hydroxy-5-methoxy-2-phenylchroman-4-one	Sodium/hydrogen exchanger 1 (by homology)	SLC9A1	P19634
MOL000228	(2R)-7-hydroxy-5-methoxy-2-phenylchroman-4-one	Serine/threonine-protein kinase PLK4	PLK4	O00444
MOL000228	(2R)-7-hydroxy-5-methoxy-2-phenylchroman-4-one	Cyclin-dependent kinase 4/cyclin D	CCND3 CCND1 CDK4 CCND2	P30281 P24385 P11802 P30279
MOL000228	(2R)-7-hydroxy-5-methoxy-2-phenylchroman-4-one	Glyceraldehyde-3-phosphate dehydrogenase liver	GAPDH	P04406
MOL000228	(2R)-7-hydroxy-5-methoxy-2-phenylchroman-4-one	Kinesin-1 heavy chain/ Tyrosine-protein kinase receptor RET	RET	P07949
MOL000228	(2R)-7-hydroxy-5-methoxy-2-phenylchroman-4-one	Tubulin beta-3 chain	TUBB3	Q13509
MOL000228	(2R)-7-hydroxy-5-methoxy-2-phenylchroman-4-one	Lysine-specific histone demethylase 1	KDM1A	O60341
MOL000228	(2R)-7-hydroxy-5-methoxy-2-phenylchroman-4-one	Serine/threonine-protein kinase mTOR	MTOR	P42345
MOL000228	(2R)-7-hydroxy-5-methoxy-2-phenylchroman-4-one	PI3-kinase p110-delta subunit	PIK3CD	O00329
MOL000228	(2R)-7-hydroxy-5-methoxy-2-phenylchroman-4-one	DNA-dependent protein kinase	PRKDC	P78527
MOL000228	(2R)-7-hydroxy-5-methoxy-2-phenylchroman-4-one	PI3-kinase p110-beta subunit	PIK3CB	P42338
MOL000228	(2R)-7-hydroxy-5-methoxy-2-phenylchroman-4-one	Tyrosine-protein kinase HCK	HCK	P08631
MOL000228	(2R)-7-hydroxy-5-methoxy-2-phenylchroman-4-one	Ephrin receptor	EPHB4	P54760
MOL000228	(2R)-7-hydroxy-5-methoxy-2-phenylchroman-4-one	Beta-glucuronidase	GUSB	P08236
MOL000228	(2R)-7-hydroxy-5-methoxy-2-phenylchroman-4-one	Cathepsin L	CTSL	P07711
MOL000228	(2R)-7-hydroxy-5-methoxy-2-phenylchroman-4-one	Caspase-3	CASP3	P42574
MOL000228	(2R)-7-hydroxy-5-methoxy-2-phenylchroman-4-one	PI4-kinase beta subunit	PI4KB	Q9UBF8
MOL000228	(2R)-7-hydroxy-5-methoxy-2-phenylchroman-4-one	Caspase-7	CASP7	P55210
MOL000228	(2R)-7-hydroxy-5-methoxy-2-phenylchroman-4-one	Metabotropic glutamate receptor 4	GRM4	Q14833
MOL000228	(2R)-7-hydroxy-5-methoxy-2-phenylchroman-4-one	Fibroblast growth factor receptor 1	FGFR1	P11362
MOL000228	(2R)-7-hydroxy-5-methoxy-2-phenylchroman-4-one	Macrophage-expressed gene 1 protein	MPEG1	Q2M385
MOL000228	(2R)-7-hydroxy-5-methoxy-2-phenylchroman-4-one	Inhibitor of apoptosis protein 3	XIAP	P98170
MOL002714	baicalein	Tyrosine-protein kinase FYN	FYN	P06241
MOL002714	baicalein	Neurokinin 2 receptor	TACR2	P21452
MOL002714	baicalein	Cytosolic phospholipase A2	PLA2G4A	P47712
MOL002910	Carthamidin	Neuronal acetylcholine receptor protein alpha-7 subunit	CHRNA7	P36544
MOL002910	Carthamidin	Dual-specificity tyrosine-phosphorylation regulated kinase 1A	DYRK1A	Q13627
MOL002910	Carthamidin	6-phosphogluconate dehydrogenase	PGD	P52209
MOL002910	Carthamidin	Carbonic anhydrase VB	CA5B	Q9Y2D0
MOL002910	Carthamidin	Metabotropic glutamate receptor 2 (by homology)	GRM2	Q14416
MOL002910	Carthamidin	DNA (cytosine-5)-methyltransferase 1	DNMT1	P26358
MOL002910	Carthamidin	Matrix metalloproteinase 14	MMP14	P50281
MOL002910	Carthamidin	Signal transducer and activator of transcription 1-alpha/beta	STAT1	P42224
MOL002910	Carthamidin	Free fatty acid receptor 1	FFAR1	O14842
MOL002910	Carthamidin	Quinone reductase 2	NQO2	P16083
MOL002910	Carthamidin	Leukotriene B4 receptor 1	LTB4R	Q15722
MOL002910	Carthamidin	Thymidylate synthase (by homology)	TYMS	P04818
MOL002910	Carthamidin	NAD-dependent deacetylase sirtuin 2	SIRT2	Q8IXJ6
MOL002910	Carthamidin	Placenta growth factor	PGF	P49763
MOL002910	Carthamidin	Vascular endothelial growth factor A	VEGFA	P15692
MOL002910	Carthamidin	14-3-3 protein gamma	YWHAG	P61981
MOL002910	Carthamidin	Voltage-gated potassium channel subunit Kv1.3	KCNA3	P22001
MOL002910	Carthamidin	Bile acid receptor FXR	NR1H4	Q96RI1
MOL002910	Carthamidin	Coagulation factor VII/tissue factor	F3	P13726
MOL002911	2,6,2',4'-tetrahydroxy-6'-methoxychaleone	3-phosphoinositide dependent protein kinase-1	PDPK1	O15530
MOL002911	2,6,2',4'-tetrahydroxy-6'-methoxychaleone	Toll-like receptor (TLR7/TLR9)	TLR9	Q9NR96
MOL002911	2,6,2',4'-tetrahydroxy-6'-methoxychaleone	Tubulin beta-1 chain	TUBB1	Q9H4B7
MOL002911	2,6,2',4'-tetrahydroxy-6'-methoxychaleone	Aldehyde dehydrogenase	ALDH2	P05091
MOL002911	2,6,2',4'-tetrahydroxy-6'-methoxychaleone	Cyclin-dependent kinase 1/cyclin B1	CDK1 CCNB1	P06493 P14635
MOL002911	2,6,2',4'-tetrahydroxy-6'-methoxychaleone	Nerve growth factor receptor Trk-A	NTRK1	P04629
MOL002911	2,6,2',4'-tetrahydroxy-6'-methoxychaleone	ADAMTS5	ADAMTS5	Q9UNA0
MOL002911	2,6,2',4'-tetrahydroxy-6'-methoxychaleone	MAP kinase-activated protein kinase 5	MAPKAPK5	Q8IW41
MOL002911	2,6,2',4'-tetrahydroxy-6'-methoxychaleone	Serine/threonine-protein kinase PIM3	PIM3	Q86V86
MOL002911	2,6,2',4'-tetrahydroxy-6'-methoxychaleone	Serine/threonine-protein kinase Sgk1	SGK1	O00141
MOL002911	2,6,2',4'-tetrahydroxy-6'-methoxychaleone	Casein kinase I gamma 1	CSNK1G1	Q9HCP0
MOL002911	2,6,2',4'-tetrahydroxy-6'-methoxychaleone	Ribosomal protein S6 kinase alpha 1	RPS6KA1	Q15418
MOL002911	2,6,2',4'-tetrahydroxy-6'-methoxychaleone	Rho-associated protein kinase 1	ROCK1	Q13464
MOL002911	2,6,2',4'-tetrahydroxy-6'-methoxychaleone	MAP kinase ERK2	MAPK1	P28482
MOL002911	2,6,2',4'-tetrahydroxy-6'-methoxychaleone	Histone deacetylase 3/Nuclear receptor corepressor 2 (HDAC3/NCoR2)	NCOR2 HDAC3	Q9Y618 O15379
MOL002911	2,6,2',4'-tetrahydroxy-6'-methoxychaleone	ADAM17	ADAM17	P78536
MOL002911	2,6,2',4'-tetrahydroxy-6'-methoxychaleone	Serine/threonine-protein kinase Aurora-A	AURKA	O14965
MOL002911	2,6,2',4'-tetrahydroxy-6'-methoxychaleone	Platelet-derived growth factor receptor beta	PDGFRB	P09619
MOL002911	2,6,2',4'-tetrahydroxy-6'-methoxychaleone	Protein-arginine N-methyltransferase 1	PRMT1	Q99873
MOL002911	2,6,2',4'-tetrahydroxy-6'-methoxychaleone	Dynamin-1	DNM1	Q05193
MOL002911	2,6,2',4'-tetrahydroxy-6'-methoxychaleone	Serine/threonine-protein kinase B-raf	BRAF	P15056
MOL002911	2,6,2',4'-tetrahydroxy-6'-methoxychaleone	Matrix metalloproteinase 7	MMP7	P09237
MOL002911	2,6,2',4'-tetrahydroxy-6'-methoxychaleone	Serine/threonine-protein kinase Chk2	CHEK2	O96017
MOL002911	2,6,2',4'-tetrahydroxy-6'-methoxychaleone	Quinone reductase 1	NQO1	P15559
MOL002911	2,6,2',4'-tetrahydroxy-6'-methoxychaleone	TNF-alpha	TNF	P01375
MOL002911	2,6,2',4'-tetrahydroxy-6'-methoxychaleone	Immunoglobulin epsilon Fc receptor	FCER2	P06734
MOL002911	2,6,2',4'-tetrahydroxy-6'-methoxychaleone	Dual specificity phosphatase Cdc25C	CDC25C	P30307
MOL002911	2,6,2',4'-tetrahydroxy-6'-methoxychaleone	Glutathione S-transferase Pi	GSTP1	P09211
MOL002911	2,6,2',4'-tetrahydroxy-6'-methoxychaleone	Glutathione S-transferase Mu 2	GSTM2	P28161
MOL002911	2,6,2',4'-tetrahydroxy-6'-methoxychaleone	Sphingosine kinase 2	SPHK2	Q9NRA0
MOL002911	2,6,2',4'-tetrahydroxy-6'-methoxychaleone	Sphingosine kinase 1	SPHK1	Q9NYA1
MOL002911	2,6,2',4'-tetrahydroxy-6'-methoxychaleone	Matrix metalloproteinase 16	MMP16	P51512
MOL002911	2,6,2',4'-tetrahydroxy-6'-methoxychaleone	Matrix metalloproteinase 15	MMP15	P51511
MOL002913	Dihydrobaicalin_qt	CMP-N-acetylneuraminate-beta-1,4-galactoside alpha-2,3-sialyltransferase	ST3GAL3	Q11203
MOL002913	Dihydrobaicalin_qt	Alpha-(1,3)-fucosyltransferase 7	FUT7	Q11130
MOL002913	Dihydrobaicalin_qt	Fucosyltransferase 4	FUT4	P22083
MOL002913	Dihydrobaicalin_qt	Serine/threonine-protein kinase Aurora-C	AURKC	Q9UQB9
MOL002913	Dihydrobaicalin_qt	Ribosomal protein S6 kinase 2	RPS6KB2	Q9UBS0
MOL002913	Dihydrobaicalin_qt	Phospholipase C-gamma-2	PLCG2	P16885
MOL002913	Dihydrobaicalin_qt	Platelet-derived growth factor receptor	PDGFRA PDGFRB	P16234 P09619
MOL002913	Dihydrobaicalin_qt	Cyclin-dependent kinase 4	CDK4	P11802
MOL002913	Dihydrobaicalin_qt	c-Jun N-terminal kinase 2	MAPK9	P45984
MOL002913	Dihydrobaicalin_qt	Poly [ADP-ribose] polymerase 2	PARP2	Q9UGN5
MOL002914	Eriodyctiol (flavanone)	HERG	KCNH2	Q12809
MOL002914	Eriodyctiol (flavanone)	17-beta-hydroxysteroid dehydrogenase 14	HSD17B14	Q9BPX1
MOL002914	Eriodyctiol (flavanone)	Potassium-transporting ATPase	ATP4B ATP4A	P51164 P20648
MOL002914	Eriodyctiol (flavanone)	Thymidine phosphorylase	TYMP	P19971
MOL002914	Eriodyctiol (flavanone)	Purine nucleoside phosphorylase (by homology)	PNP	P00491
MOL002914	Eriodyctiol (flavanone)	SUMO-activating enzyme	SAE1 UBA2	Q9UBE0 Q9UBT2
MOL002914	Eriodyctiol (flavanone)	Estradiol 17-beta-dehydrogenase 3	HSD17B3	P37058
MOL002926	dihydrooroxylin A	Phosphomannomutase 2	PMM2	O15305
MOL002926	dihydrooroxylin A	LDL-associated phospholipase A2	PLA2G7	Q13093
MOL002926	dihydrooroxylin A	Phosphoethanolamine/phosphocholine phosphatase	PHOSPHO1	Q8TCT1
MOL002926	dihydrooroxylin A	Signal transducer and activator of transcription 3	STAT3	P40763
MOL002926	dihydrooroxylin A	Interferon-induced, double-stranded RNA-activated protein kinase	EIF2AK2	P19525
MOL002926	dihydrooroxylin A	Ectonucleotide pyrophosphatase/phosphodiesterase family member 1	ENPP1	P22413
MOL002926	dihydrooroxylin A	Adenosine A2b receptor	ADORA2B	P29275
MOL002926	dihydrooroxylin A	Cyclophilin A	PPIA	P62937
MOL002926	dihydrooroxylin A	N-acylsphingosine-amidohydrolase	NAAA	Q02083
MOL002927	Skullcapflavone II	Subtilisin/kexin type 7	PCSK7	Q16549
MOL002927	Skullcapflavone II	Cytochrome P450 2C9	CYP2C9	P11712
MOL002927	Skullcapflavone II	Histone chaperone ASF1A	ASF1A	Q9Y294
MOL002927	Skullcapflavone II	Equilibrative nucleoside transporter 1	SLC29A1	Q99808
MOL002932	Panicolin	Cathepsin (V and K)	CTSV	O60911
MOL002937	DIHYDROOROXYLIN	Growth factor receptor-bound protein 7	GRB7	Q14451
MOL000449	Stigmasterol	Voltage-gated potassium channel subunit Kv1.5	KCNA5	P22460
MOL000449	Stigmasterol	Cannabinoid receptor 1 (by homology)	CNR1	P21554
MOL000449	Stigmasterol	Serotonin 2b (5-HT2b) receptor	HTR2B	P41595
MOL000449	Stigmasterol	Vasopressin V1a receptor	AVPR1A	P37288
MOL001490	bis[(2S)-2-ethylhexyl] benzene-1,2-dicarboxylate	FK506-binding protein 1A	FKBP1A	P62942
MOL001490	bis[(2S)-2-ethylhexyl] benzene-1,2-dicarboxylate	Translocator protein (by homology)	TSPO	P30536
MOL001490	bis[(2S)-2-ethylhexyl] benzene-1,2-dicarboxylate	Cathepsin K	CTSK	P43235
MOL001490	bis[(2S)-2-ethylhexyl] benzene-1,2-dicarboxylate	Cathepsin S	CTSS	P25774
MOL001490	bis[(2S)-2-ethylhexyl] benzene-1,2-dicarboxylate	Cyclin-dependent kinase 4/cyclin D1	CCND1 CDK4	P24385 P11802
MOL001490	bis[(2S)-2-ethylhexyl] benzene-1,2-dicarboxylate	G-protein coupled bile acid receptor 1	GPBAR1	Q8TDU6
MOL001490	bis[(2S)-2-ethylhexyl] benzene-1,2-dicarboxylate	Integrin alpha-4/beta-7	ITGB7 ITGA4	P26010 P13612
MOL001490	bis[(2S)-2-ethylhexyl] benzene-1,2-dicarboxylate	GABA-A receptor; alpha-5/beta-3/gamma-2	GABRB3 GABRG2 GABRA5	P28472 P18507 P31644
MOL001490	bis[(2S)-2-ethylhexyl] benzene-1,2-dicarboxylate	GABA-A receptor; alpha-2/beta-3/gamma-2	GABRA2 GABRB3 GABRG2	P47869 P28472 P18507
MOL001490	bis[(2S)-2-ethylhexyl] benzene-1,2-dicarboxylate	P2X purinoceptor 7	P2RX7	Q99572
MOL001490	bis[(2S)-2-ethylhexyl] benzene-1,2-dicarboxylate	G protein-coupled receptor 44	PTGDR2	Q9Y5Y4
MOL001490	bis[(2S)-2-ethylhexyl] benzene-1,2-dicarboxylate	Short transient receptor potential channel 6	TRPC6	Q9Y210
MOL001490	bis[(2S)-2-ethylhexyl] benzene-1,2-dicarboxylate	Short transient receptor potential channel 3	TRPC3	Q13507
MOL001490	bis[(2S)-2-ethylhexyl] benzene-1,2-dicarboxylate	Glucose transporter	SLC2A1	P11166
MOL001490	bis[(2S)-2-ethylhexyl] benzene-1,2-dicarboxylate	MAP kinase p38 beta	MAPK11	Q15759
MOL001490	bis[(2S)-2-ethylhexyl] benzene-1,2-dicarboxylate	Vanilloid receptor	TRPV1	Q8NER1
MOL001490	bis[(2S)-2-ethylhexyl] benzene-1,2-dicarboxylate	Solute carrier family 2, facilitated glucose transporter member 3	SLC2A3	P11169
MOL001490	bis[(2S)-2-ethylhexyl] benzene-1,2-dicarboxylate	Solute carrier family 2, facilitated glucose transporter member 2	SLC2A2	P11168
MOL001490	bis[(2S)-2-ethylhexyl] benzene-1,2-dicarboxylate	Transient receptor potential cation channel subfamily V member 4	TRPV4	Q9HBA0
MOL001490	bis[(2S)-2-ethylhexyl] benzene-1,2-dicarboxylate	Elongation of very long chain fatty acids protein 6	ELOVL6	Q9H5J4
MOL001490	bis[(2S)-2-ethylhexyl] benzene-1,2-dicarboxylate	Transient receptor potential cation channel subfamily A member 1	TRPA1	O75762
MOL001490	bis[(2S)-2-ethylhexyl] benzene-1,2-dicarboxylate	Vascular endothelial growth factor receptor 1	FLT1	P17948
MOL001490	bis[(2S)-2-ethylhexyl] benzene-1,2-dicarboxylate	Cathepsin D	CTSD	P07339
MOL001490	bis[(2S)-2-ethylhexyl] benzene-1,2-dicarboxylate	Hormone sensitive lipase	LIPE	Q05469
MOL001490	bis[(2S)-2-ethylhexyl] benzene-1,2-dicarboxylate	Serotonin 7 (5-HT7) receptor	HTR7	P34969
MOL001490	bis[(2S)-2-ethylhexyl] benzene-1,2-dicarboxylate	Phosphodiesterase 7A	PDE7A	Q13946
MOL001490	bis[(2S)-2-ethylhexyl] benzene-1,2-dicarboxylate	Intermediate conductance calcium-activated potassium channel protein 4	KCNN4	O15554
MOL001490	bis[(2S)-2-ethylhexyl] benzene-1,2-dicarboxylate	Orexin receptor 2	HCRTR2	O43614
MOL001490	bis[(2S)-2-ethylhexyl] benzene-1,2-dicarboxylate	Orexin receptor 1	HCRTR1	O43613
MOL001490	bis[(2S)-2-ethylhexyl] benzene-1,2-dicarboxylate	Polyadenylate-binding protein 1	PABPC1	P11940
MOL001490	bis[(2S)-2-ethylhexyl] benzene-1,2-dicarboxylate	Glycine transporter 1	SLC6A9	P48067
MOL001490	bis[(2S)-2-ethylhexyl] benzene-1,2-dicarboxylate	Sodium channel protein type X alpha subunit	SCN10A	Q9Y5Y9
MOL001490	bis[(2S)-2-ethylhexyl] benzene-1,2-dicarboxylate	Smoothened homolog	SMO	Q99835
MOL001490	bis[(2S)-2-ethylhexyl] benzene-1,2-dicarboxylate	Glutamate carboxypeptidase II	FOLH1	Q04609
MOL001490	bis[(2S)-2-ethylhexyl] benzene-1,2-dicarboxylate	Isocitrate dehydrogenase [NADP] cytoplasmic	IDH1	O75874
MOL001490	bis[(2S)-2-ethylhexyl] benzene-1,2-dicarboxylate	GABA-A receptor; alpha-6/beta-3/gamma-2	GABRG2 GABRB3 GABRA6	P18507 P28472 Q16445
MOL001490	bis[(2S)-2-ethylhexyl] benzene-1,2-dicarboxylate	Mitogen-activated protein kinase kinase kinase 8	MAP3K8	P41279
MOL001490	bis[(2S)-2-ethylhexyl] benzene-1,2-dicarboxylate	Transitional endoplasmic reticulum ATPase	VCP	P55072
MOL001490	bis[(2S)-2-ethylhexyl] benzene-1,2-dicarboxylate	N-arachidonyl glycine receptor	GPR18	Q14330
MOL001490	bis[(2S)-2-ethylhexyl] benzene-1,2-dicarboxylate	Neurokinin 3 receptor	TACR3	P29371
MOL001490	bis[(2S)-2-ethylhexyl] benzene-1,2-dicarboxylate	Pyroglutamylated RFamide peptide receptor	QRFPR	Q96P65
MOL001490	bis[(2S)-2-ethylhexyl] benzene-1,2-dicarboxylate	Glutamate NMDA receptor; GRIN1/GRIN2A	GRIN2A GRIN1	Q12879 Q05586
MOL001490	bis[(2S)-2-ethylhexyl] benzene-1,2-dicarboxylate	Scavenger receptor class B member 1	SCARB1	Q8WTV0
MOL001490	bis[(2S)-2-ethylhexyl] benzene-1,2-dicarboxylate	Mineralocorticoid receptor	NR3C2	P08235
MOL001490	bis[(2S)-2-ethylhexyl] benzene-1,2-dicarboxylate	Neuromedin B receptor	NMBR	P28336
MOL001490	bis[(2S)-2-ethylhexyl] benzene-1,2-dicarboxylate	Calpain 1	CAPN1	P07384
MOL001490	bis[(2S)-2-ethylhexyl] benzene-1,2-dicarboxylate	GABA-A receptor; alpha-1/beta-2/gamma-2	GABRA1 GABRB2 GABRG2	P14867 P47870 P18507
MOL001506	Supraene	Cannabinoid receptor 2	CNR2	P34972
MOL001506	Supraene	C-C chemokine receptor type 5	CCR5	P51681
MOL001506	Supraene	Cytochrome P450 24A1	CYP24A1	Q07973
MOL001506	Supraene	Orphan nuclear receptor LRH-1	NR5A2	O00482
MOL001506	Supraene	Steroidogenic factor 1	NR5A1	Q13285
MOL001506	Supraene	Neuropeptide S receptor	NPSR1	Q6W5P4
MOL001506	Supraene	5-lipoxygenase activating protein	ALOX5AP	P20292
MOL001506	Supraene	Zinc finger protein GLI2	GLI2	P10070
MOL001506	Supraene	Zinc finger protein GLI1	GLI1	P08151
MOL001506	Supraene	Acyl coenzyme A:cholesterol acyltransferase 1	SOAT1	P35610
MOL001506	Supraene	Neuropeptide Y receptor type 1	NPY1R	P25929
MOL001506	Supraene	Histamine H2 receptor	HRH2	P25021
MOL001506	Supraene	Histamine H3 receptor	HRH3	Q9Y5N1
MOL001506	Supraene	Histamine H4 receptor	HRH4	Q9H3N8
MOL001506	Supraene	Muscarinic acetylcholine receptor M4	CHRM4	P08173
MOL001506	Supraene	Receptor protein-tyrosine kinase erbB-2	ERBB2	P04626
MOL001506	Supraene	Alpha-2a adrenergic receptor	ADRA2A	P08913
MOL001506	Supraene	Adrenergic receptor alpha-2	ADRA2C	P18825
MOL001506	Supraene	Alpha-2b adrenergic receptor	ADRA2B	P18089
MOL001506	Supraene	Muscarinic acetylcholine receptor M5	CHRM5	P08912
MOL001506	Supraene	Muscarinic acetylcholine receptor M1	CHRM1	P11229
MOL001506	Supraene	Dopamine transporter	SLC6A3	Q01959
MOL001506	Supraene	Muscarinic acetylcholine receptor M3	CHRM3	P20309
MOL001506	Supraene	Melanocortin receptor 4	MC4R	P32245
MOL001506	Supraene	Melanocortin receptor 5	MC5R	P33032
MOL001506	Supraene	Endothelin-converting enzyme 1	ECE1	P42892
MOL001506	Supraene	Cholecystokinin A receptor	CCKAR	P32238
MOL001506	Supraene	Nuclear receptor ROR-beta	RORB	Q92753
MOL001506	Supraene	Pregnane X receptor	NR1I2	O75469
MOL001506	Supraene	Purinergic receptor P2Y1	P2RY1	P47900
MOL001506	Supraene	Phosphodiesterase 6D	PDE6D	O43924
MOL001506	Supraene	Proteinase-activated receptor 1	F2R	P25116
MOL001506	Supraene	Calcitonin-gene-related peptide receptor, CALCRL/RAMP1	CALCRL RAMP1	Q16602 O60894
MOL001506	Supraene	Choline kinase alpha	CHKA	P35790
MOL001506	Supraene	Microsomal triglyceride transfer protein large subunit	MTTP	P55157
MOL001506	Supraene	Apolipoprotein B-100	APOB	P04114
MOL001506	Supraene	C3a anaphylatoxin chemotactic receptor	C3AR1	Q16581
MOL001506	Supraene	Gamma-secretase	PSEN2 PSENEN NCSTN APH1A PSEN1 APH1B	P49810 Q9NZ42 Q92542 Q96BI3 P49768 Q8WW43
MOL001506	Supraene	Autotaxin	ENPP2	Q13822
MOL001506	Supraene	C-X-C chemokine receptor type 3	CXCR3	P49682
MOL001506	Supraene	Somatostatin receptor 1	SSTR1	P30872
MOL002879	Diop	Potassium channel subfamily K member 2 (by homology)	KCNK2	O95069
MOL002879	Diop	Gonadotropin-releasing hormone receptor	GNRHR	P30968
MOL002879	Diop	Angiotensin II receptor	AGTR2	P50052
MOL002879	Diop	2-acylglycerol O-acyltransferase 2	MOGAT2	Q3SYC2
MOL002879	Diop	Sodium channel protein type II alpha subunit	SCN2A	Q99250
MOL002879	Diop	Sodium/calcium exchanger 1	SLC8A1	P32418
MOL002879	Diop	Anandamide amidohydrolase	FAAH	O00519
MOL002879	Diop	ADAMTS4	ADAMTS4	O75173
MOL002879	Diop	Plectin	PLEC	Q15149
MOL002879	Diop	Purinergic receptor P2Y12	P2RY12	Q9H244
MOL002879	Diop	Heparanase	HPSE	Q9Y251
MOL002879	Diop	Tyrosine-protein kinase ITK/TSK	ITK	Q08881
MOL002879	Diop	Serine/threonine-protein kinase TAO3	TAOK3	Q9H2K8
MOL002879	Diop	Glutaminase kidney isoform, mitochondrial	GLS	O94925
MOL002879	Diop	Tyrosine-protein kinase BTK	BTK	Q06187
MOL002879	Diop	Serine/threonine-protein kinase TAO1	TAOK1	Q7L7X3
MOL002879	Diop	Sodium channel protein type V alpha subunit	SCN5A	Q14524
MOL002879	Diop	LIM domain kinase 1	LIMK1	P53667
MOL002879	Diop	LIM domain kinase 2	LIMK2	P53671
MOL002879	Diop	TRAF2- and NCK-interacting kinase	TNIK	Q9UKE5
MOL002879	Diop	Ribosomal protein S6 kinase alpha 2	RPS6KA2	Q15349
MOL002879	Diop	Bradykinin B1 receptor	BDKRB1	P46663
MOL002879	Diop	Serotonin 1a (5-HT1a) receptor	HTR1A	P08908
MOL002879	Diop	Dual specificity protein kinase TTK	TTK	P33981
MOL002879	Diop	Tyrosine-protein kinase receptor TYRO3	TYRO3	Q06418
MOL002879	Diop	Histone acetyltransferase p300	EP300	Q09472
MOL002879	Diop	Histone acetyltransferase PCAF	KAT2B	Q92831
MOL002879	Diop	Histone acetyltransferase GCN5	KAT2A	Q92830
MOL002879	Diop	Cyclin T1	CCNT1	O60563
MOL002879	Diop	Histone deacetylase 4	HDAC4	P56524
MOL008206	Moslosooflavone	Lysine-specific demethylase 5A	KDM5A	P29375
MOL008206	Moslosooflavone	Coagulation factor XII	F12	P00748
MOL010415	11,13-Eicosadienoic acid, methyl ester	Epoxide hydrolase 1	EPHX1	P07099
MOL010415	11,13-Eicosadienoic acid, methyl ester	Acyl-protein thioesterase 1	LYPLA1	O75608
MOL010415	11,13-Eicosadienoic acid, methyl ester	Acyl-protein thioesterase 2	LYPLA2	O95372
MOL010415	11,13-Eicosadienoic acid, methyl ester	Sn1-specific diacylglycerol lipase alpha	DAGLA	Q9Y4D2
MOL010415	11,13-Eicosadienoic acid, methyl ester	Alpha-1d adrenergic receptor	ADRA1D	P25100
MOL010415	11,13-Eicosadienoic acid, methyl ester	Alpha-1a adrenergic receptor	ADRA1A	P35348
MOL010415	11,13-Eicosadienoic acid, methyl ester	Alpha-1b adrenergic receptor	ADRA1B	P35368
MOL010415	11,13-Eicosadienoic acid, methyl ester	Glucose-dependent insulinotropic receptor	GPR119	Q8TDV5
MOL010415	11,13-Eicosadienoic acid, methyl ester	Isoprenylcysteine carboxyl methyltransferase	ICMT	O60725
MOL010415	11,13-Eicosadienoic acid, methyl ester	Geranylgeranyl transferase type I	PGGT1B FNTA	P53609 P49354
MOL010415	11,13-Eicosadienoic acid, methyl ester	Tyrosine-protein kinase JAK1	JAK1	P23458
MOL010415	11,13-Eicosadienoic acid, methyl ester	Calcitonin gene-related peptide type 1 receptor	CALCRL	Q16602
MOL010415	11,13-Eicosadienoic acid, methyl ester	Ribosomal protein S6 kinase 1	RPS6KB1	P23443
MOL010415	11,13-Eicosadienoic acid, methyl ester	Pyruvate dehydrogenase kinase isoform 1	PDK1	Q15118
MOL010415	11,13-Eicosadienoic acid, methyl ester	Acyl coenzyme A:cholesterol acyltransferase 2	SOAT2	O75908
MOL010415	11,13-Eicosadienoic acid, methyl ester	High-affinity choline transporter (by homology)	SLC5A7	Q9GZV3
MOL010415	11,13-Eicosadienoic acid, methyl ester	NAD-dependent deacetylase sirtuin 3	SIRT3	Q9NTG7
MOL012245	5,7,4'-trihydroxy-6-methoxyflavanone	Hematopoietic prostaglandin D synthase	HPGDS	O60760
MOL012245	5,7,4'-trihydroxy-6-methoxyflavanone	Cytochrome P450 3A4	CYP3A4	P08684
MOL001670	2-methoxy-3-methyl-9,10-anthraquinone	Protein-tyrosine phosphatase 4A3	PTP4A3	O75365
MOL001670	2-methoxy-3-methyl-9,10-anthraquinone	Cytochrome P450 11B1	CYP11B1	P15538
MOL001670	2-methoxy-3-methyl-9,10-anthraquinone	Cytochrome P450 11B2	CYP11B2	P19099
MOL001670	2-methoxy-3-methyl-9,10-anthraquinone	Serine-protein kinase ATM	ATM	Q13315
MOL001670	2-methoxy-3-methyl-9,10-anthraquinone	Cyclin-dependent kinase 2/cyclin E	CCNE2 CDK2 CCNE1	O96020 P24941 P24864
MOL001670	2-methoxy-3-methyl-9,10-anthraquinone	Voltage-gated N-type calcium channel alpha-1B subunit	CACNA1B	Q00975
MOL001670	2-methoxy-3-methyl-9,10-anthraquinone	Alpha-ketoglutarate-dependent dioxygenase FTO	FTO	Q9C0B1
MOL001670	2-methoxy-3-methyl-9,10-anthraquinone	CDK8/Cyclin C	CCNC CDK8	P24863 P49336
MOL001670	2-methoxy-3-methyl-9,10-anthraquinone	Intercellular adhesion molecule-1	ICAM1	P05362
MOL001670	2-methoxy-3-methyl-9,10-anthraquinone	Vascular cell adhesion protein 1	VCAM1	P19320
MOL001670	2-methoxy-3-methyl-9,10-anthraquinone	GABA receptor alpha-1 subunit	GABRA1	P14867
MOL001670	2-methoxy-3-methyl-9,10-anthraquinone	GABA receptor alpha-5 subunit	GABRA5	P31644
MOL001670	2-methoxy-3-methyl-9,10-anthraquinone	Protein tyrosine kinase 2 beta	PTK2B	Q14289
MOL001670	2-methoxy-3-methyl-9,10-anthraquinone	Chymase	CMA1	P23946
MOL001670	2-methoxy-3-methyl-9,10-anthraquinone	Tumor necrosis factor receptor R1	TNFRSF1A	P19438
MOL001670	2-methoxy-3-methyl-9,10-anthraquinone	Dual specificity mitogen-activated protein kinase kinase 1	MAP2K1	Q02750
MOL001670	2-methoxy-3-methyl-9,10-anthraquinone	Tryptophan 2,3-dioxygenase	TDO2	P48775
MOL001670	2-methoxy-3-methyl-9,10-anthraquinone	Phosphodiesterase 9A	PDE9A	O76083
MOL001670	2-methoxy-3-methyl-9,10-anthraquinone	Cyclin-dependent kinase 7/ cyclin H	CDK7 CCNH	P50613 P51946
MOL001670	2-methoxy-3-methyl-9,10-anthraquinone	Phosphodiesterase 2A	PDE2A	O00408
MOL001663	(4aS,6aR,6aS,6bR,8aR,10R,12aR,14bS)-10-hydroxy-2,2,6a,6b,9,9,12a-heptamethyl-1,3,4,5,6,6a,7,8,8a,10,11,12,13,14b-tetradecahydropicene-4a-carboxylic acid	CD81 antigen	CD81	P60033
MOL001663	(4aS,6aR,6aS,6bR,8aR,10R,12aR,14bS)-10-hydroxy-2,2,6a,6b,9,9,12a-heptamethyl-1,3,4,5,6,6a,7,8,8a,10,11,12,13,14b-tetradecahydropicene-4a-carboxylic acid	Progesterone receptor	PGR	P06401
MOL001663	(4aS,6aR,6aS,6bR,8aR,10R,12aR,14bS)-10-hydroxy-2,2,6a,6b,9,9,12a-heptamethyl-1,3,4,5,6,6a,7,8,8a,10,11,12,13,14b-tetradecahydropicene-4a-carboxylic acid	Glutamate receptor ionotropic kainate 1	GRIK1	P39086
MOL001663	(4aS,6aR,6aS,6bR,8aR,10R,12aR,14bS)-10-hydroxy-2,2,6a,6b,9,9,12a-heptamethyl-1,3,4,5,6,6a,7,8,8a,10,11,12,13,14b-tetradecahydropicene-4a-carboxylic acid	Glutamate receptor ionotropic kainate 2	GRIK2	Q13002
MOL001663	(4aS,6aR,6aS,6bR,8aR,10R,12aR,14bS)-10-hydroxy-2,2,6a,6b,9,9,12a-heptamethyl-1,3,4,5,6,6a,7,8,8a,10,11,12,13,14b-tetradecahydropicene-4a-carboxylic acid	Cysteinyl leukotriene receptor 1	CYSLTR1	Q9Y271
MOL001663	(4aS,6aR,6aS,6bR,8aR,10R,12aR,14bS)-10-hydroxy-2,2,6a,6b,9,9,12a-heptamethyl-1,3,4,5,6,6a,7,8,8a,10,11,12,13,14b-tetradecahydropicene-4a-carboxylic acid	Sphingosine 1-phosphate receptor Edg-5	S1PR2	O95136
MOL001663	(4aS,6aR,6aS,6bR,8aR,10R,12aR,14bS)-10-hydroxy-2,2,6a,6b,9,9,12a-heptamethyl-1,3,4,5,6,6a,7,8,8a,10,11,12,13,14b-tetradecahydropicene-4a-carboxylic acid	Heat shock factor protein 1	HSF1	Q00613
MOL001663	(4aS,6aR,6aS,6bR,8aR,10R,12aR,14bS)-10-hydroxy-2,2,6a,6b,9,9,12a-heptamethyl-1,3,4,5,6,6a,7,8,8a,10,11,12,13,14b-tetradecahydropicene-4a-carboxylic acid	Opioid growth factor receptor-like protein 1	OGFRL1	Q5TC84
MOL001663	(4aS,6aR,6aS,6bR,8aR,10R,12aR,14bS)-10-hydroxy-2,2,6a,6b,9,9,12a-heptamethyl-1,3,4,5,6,6a,7,8,8a,10,11,12,13,14b-tetradecahydropicene-4a-carboxylic acid	DNA polymerase alpha subunit	POLA1	P09884
MOL001663	(4aS,6aR,6aS,6bR,8aR,10R,12aR,14bS)-10-hydroxy-2,2,6a,6b,9,9,12a-heptamethyl-1,3,4,5,6,6a,7,8,8a,10,11,12,13,14b-tetradecahydropicene-4a-carboxylic acid	Interleukin-6	IL6	P05231
MOL001663	(4aS,6aR,6aS,6bR,8aR,10R,12aR,14bS)-10-hydroxy-2,2,6a,6b,9,9,12a-heptamethyl-1,3,4,5,6,6a,7,8,8a,10,11,12,13,14b-tetradecahydropicene-4a-carboxylic acid	Glutamine synthetase	GLUL	P15104
MOL001663	(4aS,6aR,6aS,6bR,8aR,10R,12aR,14bS)-10-hydroxy-2,2,6a,6b,9,9,12a-heptamethyl-1,3,4,5,6,6a,7,8,8a,10,11,12,13,14b-tetradecahydropicene-4a-carboxylic acid	Oxytocin receptor (by homology)	OXTR	P30559
MOL001646	2,3-dimethoxy-6-methyanthraquinone	Protein-glutamine gamma-glutamyltransferase	TGM2	P21980
MOL001646	2,3-dimethoxy-6-methyanthraquinone	Muscle glycogen phosphorylase	PYGM	P11217
MOL001646	2,3-dimethoxy-6-methyanthraquinone	Phosphodiesterase 1B	PDE1B	Q01064
MOL001646	2,3-dimethoxy-6-methyanthraquinone	Protoporphyrinogen oxidase	PPOX	P50336
MOL001646	2,3-dimethoxy-6-methyanthraquinone	CDK9/cyclin T1	CDK9 CCNT1	P50750 O60563
MOL001646	2,3-dimethoxy-6-methyanthraquinone	Sodium channel protein type IV alpha subunit	SCN4A	P35499
MOL001646	2,3-dimethoxy-6-methyanthraquinone	Small conductance calcium-activated potassium channel protein 3	KCNN3	Q9UGI6
MOL001646	2,3-dimethoxy-6-methyanthraquinone	Small conductance calcium-activated potassium channel protein 1	KCNN1	Q92952
MOL001646	2,3-dimethoxy-6-methyanthraquinone	Small conductance calcium-activated potassium channel protein 2	KCNN2	Q9H2S1
MOL001646	2,3-dimethoxy-6-methyanthraquinone	Lysine-specific demethylase 5B	KDM5B	Q9UGL1
MOL001646	2,3-dimethoxy-6-methyanthraquinone	Leukocyte common antigen	PTPRC	P08575
MOL001646	2,3-dimethoxy-6-methyanthraquinone	Cytochrome P450 2A6	CYP2A6	P11509
MOL001646	2,3-dimethoxy-6-methyanthraquinone	Metabotropic glutamate receptor 1	GRM1	Q13255
MOL001646	2,3-dimethoxy-6-methyanthraquinone	Ezrin	EZR	P15311
MOL001646	2,3-dimethoxy-6-methyanthraquinone	C5a anaphylatoxin chemotactic receptor	C5AR1	P21730
MOL001646	2,3-dimethoxy-6-methyanthraquinone	Mucosa-associated lymphoid tissue lymphoma translocation protein 1	MALT1	Q9UDY8
MOL001646	2,3-dimethoxy-6-methyanthraquinone	Serotonin 6 (5-HT6) receptor	HTR6	P50406
MOL002322	isovitexin	Interleukin-2	IL2	P60568
MOL002322	isovitexin	Protein kinase C (PKC)	PRKCZ	Q05513
MOL002322	isovitexin	Coagulation factor VII	F7	P08709
MOL002322	isovitexin	Tumour suppressor p53/oncoprotein Mdm2	TP53	P04637
MOL002322	isovitexin	Integrin alpha-V/beta-6	ITGAV ITGB6	P06756 P18564
MOL001721	Isaindigodione	Lysine-specific demethylase 6B	KDM6B	O15054
MOL001721	Isaindigodione	Lysine-specific demethylase 4D	KDM4D	Q6B0I6
MOL001721	Isaindigodione	Intercellular adhesion molecule (ICAM-1), Integrin alpha-L/beta-2	ITGAL ICAM1 ITGB2	P20701 P05362 P05107
MOL001721	Isaindigodione	Vitronectin receptor alpha	ITGAV	P06756
MOL001721	Isaindigodione	Integrin alpha2/beta1	ITGB1 ITGA2	P05556 P17301
MOL001721	Isaindigodione	Lysosomal protective protein	CTSA	P10619
MOL001721	Isaindigodione	Methionine aminopeptidase 2	METAP2	P50579
MOL001721	Isaindigodione	CREB-binding protein/p53	CREBBP	Q92793
MOL001721	Isaindigodione	Hypoxia-inducible factor prolyl 4-hydroxylase	P4HTM	Q9NXG6
MOL001721	Isaindigodione	Integrin alpha1/beta1 complex	ITGB1 ITGA1	P05556 P56199
MOL001721	Isaindigodione	Peptidyl-prolyl cis-trans isomerase NIMA-interacting 1	PIN1	Q13526
MOL001721	Isaindigodione	PTPsigma-(Brain)	PTPsigma	Q9UM81
MOL001721	Isaindigodione	Carboxypeptidase A1	CPA1	P15085
MOL001721	Isaindigodione	Angiotensin-converting enzyme 2	ACE2	Q9BYF1
MOL001721	Isaindigodione	Lysine-specific demethylase 2B	KDM2B	Q8NHM5
MOL001721	Isaindigodione	Nuclear receptor subfamily 4 group A member 1	NR4A1	P22736
MOL001721	Isaindigodione	G-protein coupled receptor kinase 2	GRK2	P25098
MOL001721	Isaindigodione	Branched-chain-amino-acid aminotransferase, mitochondrial	BCAT2	O15382
MOL001721	Isaindigodione	Poly [ADP-ribose] polymerase 15	PARP15	Q460N3
MOL001721	Isaindigodione	Poly [ADP-ribose] polymerase 10	PARP10	Q53GL7
MOL001721	Isaindigodione	Monocarboxylate transporter 4	SLC16A3	O15427
MOL001721	Isaindigodione	Interleukin-8	CXCL8	P10145
MOL001721	Isaindigodione	Lysine-specific demethylase 4A	KDM4A	O75164
MOL001721	Isaindigodione	Uracil nucleotide/cysteinyl leukotriene receptor	GPR17	Q13304
MOL001722	2-O-beta-D-glucopyranosyl-2H-1,4-benzoxazin-3(4H)-one	Adenosine deaminase	ADA	P00813
MOL001722	2-O-beta-D-glucopyranosyl-2H-1,4-benzoxazin-3(4H)-one	Gamma-glutamyl hydrolase	GGH	Q92820
MOL001722	2-O-beta-D-glucopyranosyl-2H-1,4-benzoxazin-3(4H)-one	NAALADase II	NAALAD2	Q9Y3Q0
MOL001722	2-O-beta-D-glucopyranosyl-2H-1,4-benzoxazin-3(4H)-one	Adenosine kinase	ADK	P55263
MOL001722	2-O-beta-D-glucopyranosyl-2H-1,4-benzoxazin-3(4H)-one	Bifunctional protein NCOAT	OGA	O60502
MOL001722	2-O-beta-D-glucopyranosyl-2H-1,4-benzoxazin-3(4H)-one	78 kDa glucose-regulated protein	HSPA5	P11021
MOL001722	2-O-beta-D-glucopyranosyl-2H-1,4-benzoxazin-3(4H)-one	Sucrase-isomaltase	SI	P14410
MOL001722	2-O-beta-D-glucopyranosyl-2H-1,4-benzoxazin-3(4H)-one	Cytidine deaminase	CDA	P32320
MOL001722	2-O-beta-D-glucopyranosyl-2H-1,4-benzoxazin-3(4H)-one	Thymidine kinase, cytosolic	TK1	P04183
MOL001722	2-O-beta-D-glucopyranosyl-2H-1,4-benzoxazin-3(4H)-one	Galectin-3	LGALS3	P17931
MOL001722	2-O-beta-D-glucopyranosyl-2H-1,4-benzoxazin-3(4H)-one	Galectin-9	LGALS9	O00182
MOL001722	2-O-beta-D-glucopyranosyl-2H-1,4-benzoxazin-3(4H)-one	Hypoxanthine-guanine phosphoribosyltransferase	HPRT1	P00492
MOL001722	2-O-beta-D-glucopyranosyl-2H-1,4-benzoxazin-3(4H)-one	Thymidylate kinase	DTYMK	P23919
MOL001722	2-O-beta-D-glucopyranosyl-2H-1,4-benzoxazin-3(4H)-one	Beta-glucocerebrosidase	GBA	P04062
MOL001722	2-O-beta-D-glucopyranosyl-2H-1,4-benzoxazin-3(4H)-one	Hexokinase type II	HK2	P52789
MOL001722	2-O-beta-D-glucopyranosyl-2H-1,4-benzoxazin-3(4H)-one	Hexokinase type I	HK1	P19367
MOL001722	2-O-beta-D-glucopyranosyl-2H-1,4-benzoxazin-3(4H)-one	Receptor-type tyrosine-protein phosphatase beta	PTPRB	P23467
MOL001722	2-O-beta-D-glucopyranosyl-2H-1,4-benzoxazin-3(4H)-one	Thiopurine S-methyltransferase	TPMT	P51580
MOL001722	2-O-beta-D-glucopyranosyl-2H-1,4-benzoxazin-3(4H)-one	Lysosomal alpha-glucosidase	GAA	P10253
MOL001722	2-O-beta-D-glucopyranosyl-2H-1,4-benzoxazin-3(4H)-one	Adenosylhomocysteinase	AHCY	P23526
MOL001722	2-O-beta-D-glucopyranosyl-2H-1,4-benzoxazin-3(4H)-one	Alpha-L-fucosidase I	FUCA1	P04066
MOL001722	2-O-beta-D-glucopyranosyl-2H-1,4-benzoxazin-3(4H)-one	Brain glycogen phosphorylase	PYGB	P11216
MOL001722	2-O-beta-D-glucopyranosyl-2H-1,4-benzoxazin-3(4H)-one	Caspase-6	CASP6	P55212
MOL001722	2-O-beta-D-glucopyranosyl-2H-1,4-benzoxazin-3(4H)-one	Caspase-8	CASP8	Q14790
MOL001722	2-O-beta-D-glucopyranosyl-2H-1,4-benzoxazin-3(4H)-one	Caspase-2	CASP2	P42575
MOL001722	2-O-beta-D-glucopyranosyl-2H-1,4-benzoxazin-3(4H)-one	Rhodopsin kinase	GRK1	Q15835
MOL001722	2-O-beta-D-glucopyranosyl-2H-1,4-benzoxazin-3(4H)-one	Trehalase	TREH	O43280
MOL001722	2-O-beta-D-glucopyranosyl-2H-1,4-benzoxazin-3(4H)-one	S-adenosylmethionine decarboxylase 1	AMD1	P17707
MOL001722	2-O-beta-D-glucopyranosyl-2H-1,4-benzoxazin-3(4H)-one	Beta-mannosidase (by homology)	MANBA	O00462
MOL001722	2-O-beta-D-glucopyranosyl-2H-1,4-benzoxazin-3(4H)-one	Adenylate cyclase type 10	ADCY10	Q96PN6
MOL001722	2-O-beta-D-glucopyranosyl-2H-1,4-benzoxazin-3(4H)-one	Histone deacetylase 5	HDAC5	Q9UQL6
MOL001722	2-O-beta-D-glucopyranosyl-2H-1,4-benzoxazin-3(4H)-one	Histone deacetylase 7	HDAC7	Q8WUI4
MOL001722	2-O-beta-D-glucopyranosyl-2H-1,4-benzoxazin-3(4H)-one	Histone deacetylase 11	HDAC11	Q96DB2
MOL001722	2-O-beta-D-glucopyranosyl-2H-1,4-benzoxazin-3(4H)-one	Histone deacetylase 9	HDAC9	Q9UKV0
MOL001726	pinoresinol-4-O-beta-D-apiosyl-beta-D-glucopyranoside	Platelet activating factor receptor	PTAFR	P25105
MOL001726	pinoresinol-4-O-beta-D-apiosyl-beta-D-glucopyranoside	Interleukin-1 receptor-associated kinase 4	IRAK4	Q9NWZ3
MOL001726	pinoresinol-4-O-beta-D-apiosyl-beta-D-glucopyranoside	Sodium/glucose cotransporter 1	SLC5A1	P13866
MOL001726	pinoresinol-4-O-beta-D-apiosyl-beta-D-glucopyranoside	Integrin alpha-4/beta-1	ITGB1 ITGA4	P05556 P13612
MOL001726	pinoresinol-4-O-beta-D-apiosyl-beta-D-glucopyranoside	Galectin-1	LGALS1	P09382
MOL001726	pinoresinol-4-O-beta-D-apiosyl-beta-D-glucopyranoside	Galectin-4	LGALS4	P56470
MOL001726	pinoresinol-4-O-beta-D-apiosyl-beta-D-glucopyranoside	Galectin-8	LGALS8	O00214
MOL001726	pinoresinol-4-O-beta-D-apiosyl-beta-D-glucopyranoside	Proenkephalin B	PDYN	P01213
MOL001726	pinoresinol-4-O-beta-D-apiosyl-beta-D-glucopyranoside	Receptor-type tyrosine-protein phosphatase alpha	PTPRA	P18433
MOL001726	pinoresinol-4-O-beta-D-apiosyl-beta-D-glucopyranoside	Matrix metalloproteinase 10	MMP10	P09238
MOL001726	pinoresinol-4-O-beta-D-apiosyl-beta-D-glucopyranoside	Angiotensin-converting enzyme (by homology)	ACE	P12821
MOL001726	pinoresinol-4-O-beta-D-apiosyl-beta-D-glucopyranoside	Sodium/nucleoside cotransporter 2	SLC28A2	O43868
MOL001726	pinoresinol-4-O-beta-D-apiosyl-beta-D-glucopyranoside	Folylpoly-gamma-glutamate synthetase	FPGS	Q05932
MOL001726	pinoresinol-4-O-beta-D-apiosyl-beta-D-glucopyranoside	PI3-kinase p110-alpha/p85-alpha	PIK3CA PIK3R1	P42336 P27986
MOL001726	pinoresinol-4-O-beta-D-apiosyl-beta-D-glucopyranoside	PI3-kinase p110-delta/p85-alpha	PIK3CD PIK3R1	O00329 P27986
MOL001726	pinoresinol-4-O-beta-D-apiosyl-beta-D-glucopyranoside	6-O-methylguanine-DNA methyltransferase	MGMT	P16455
MOL001726	pinoresinol-4-O-beta-D-apiosyl-beta-D-glucopyranoside	Coagulation factor IX	F9	P00740
MOL001726	pinoresinol-4-O-beta-D-apiosyl-beta-D-glucopyranoside	Protein kinase C iota	PRKCI	P41743
MOL001726	pinoresinol-4-O-beta-D-apiosyl-beta-D-glucopyranoside	Trypsin III (by homology)	PRSS3	P35030
MOL001726	pinoresinol-4-O-beta-D-apiosyl-beta-D-glucopyranoside	Inosine-5'-monophosphate dehydrogenase 2	IMPDH2	P12268
MOL001726	pinoresinol-4-O-beta-D-apiosyl-beta-D-glucopyranoside	Integrin alpha-5/beta-1	ITGB1 ITGA5	P05556 P08648
MOL001726	pinoresinol-4-O-beta-D-apiosyl-beta-D-glucopyranoside	Fibroblast growth factor receptor 3	FGFR3	P22607
MOL001726	pinoresinol-4-O-beta-D-apiosyl-beta-D-glucopyranoside	Fibroblast growth factor receptor 2	FGFR2	P21802
MOL001726	pinoresinol-4-O-beta-D-apiosyl-beta-D-glucopyranoside	Protein prune homolog	PRUNE1	Q86TP1
MOL001726	pinoresinol-4-O-beta-D-apiosyl-beta-D-glucopyranoside	Prostate specific antigen	KLK3	P07288
MOL001726	pinoresinol-4-O-beta-D-apiosyl-beta-D-glucopyranoside	Serine/threonine-protein kinase AKT	AKT3	Q9Y243
MOL001726	pinoresinol-4-O-beta-D-apiosyl-beta-D-glucopyranoside	Coagulation factor VII/tissue factor	F3 F7	P13726 P08709
MOL001728	3-[ 2′ -( 5′ - hydroxymethyl) furyl ] -1 ( 2H) -isoquinolinone-7-O-BETA-D-glucoside_qt	Dual specificity mitogen-activated protein kinase kinase 2	MAP2K2	P36507
MOL001728	3-[ 2′ -( 5′ - hydroxymethyl) furyl ] -1 ( 2H) -isoquinolinone-7-O-BETA-D-glucoside_qt	Tyrosine-protein kinase TYK2	TYK2	P29597
MOL001728	3-[ 2′ -( 5′ - hydroxymethyl) furyl ] -1 ( 2H) -isoquinolinone-7-O-BETA-D-glucoside_qt	Low affinity sodium-glucose cotransporter	SLC5A4	Q9NY91
MOL001728	3-[ 2′ -( 5′ - hydroxymethyl) furyl ] -1 ( 2H) -isoquinolinone-7-O-BETA-D-glucoside_qt	Dual specificity mitogen-activated protein kinase kinase 7	MAP2K7	O14733
MOL001728	3-[ 2′ -( 5′ - hydroxymethyl) furyl ] -1 ( 2H) -isoquinolinone-7-O-BETA-D-glucoside_qt	Nuclear factor NF-kappa-B p65 subunit	RELA	Q04206
MOL001728	3-[ 2′ -( 5′ - hydroxymethyl) furyl ] -1 ( 2H) -isoquinolinone-7-O-BETA-D-glucoside_qt	Serine/threonine-protein kinase ILK-1	ILK	Q13418
MOL001728	3-[ 2′ -( 5′ - hydroxymethyl) furyl ] -1 ( 2H) -isoquinolinone-7-O-BETA-D-glucoside_qt	Transforming protein p21/H-Ras-1	HRAS	P01112
MOL001728	3-[ 2′ -( 5′ - hydroxymethyl) furyl ] -1 ( 2H) -isoquinolinone-7-O-BETA-D-glucoside_qt	Serine/threonine-protein kinase receptor R3	ACVRL1	P37023
MOL001728	3-[ 2′ -( 5′ - hydroxymethyl) furyl ] -1 ( 2H) -isoquinolinone-7-O-BETA-D-glucoside_qt	Histone-lysine N-methyltransferase, H3 lysine-9 specific 5	EHMT1	Q9H9B1
MOL001728	3-[ 2′ -( 5′ - hydroxymethyl) furyl ] -1 ( 2H) -isoquinolinone-7-O-BETA-D-glucoside_qt	Histone-lysine N-methyltransferase, H3 lysine-9 specific 3	EHMT2	Q96KQ7
MOL001728	3-[ 2′ -( 5′ - hydroxymethyl) furyl ] -1 ( 2H) -isoquinolinone-7-O-BETA-D-glucoside_qt	Mitogen-activated protein kinase kinase kinase kinase 4	MAP4K4	O95819
MOL001728	3-[ 2′ -( 5′ - hydroxymethyl) furyl ] -1 ( 2H) -isoquinolinone-7-O-BETA-D-glucoside_qt	Receptor-type tyrosine-protein phosphatase gamma	PTPRG	P23470
MOL001728	3-[ 2′ -( 5′ - hydroxymethyl) furyl ] -1 ( 2H) -isoquinolinone-7-O-BETA-D-glucoside_qt	Vascular endothelial growth factor receptor 3	FLT4	P35916
MOL001728	3-[ 2′ -( 5′ - hydroxymethyl) furyl ] -1 ( 2H) -isoquinolinone-7-O-BETA-D-glucoside_qt	7,8-dihydro-8-oxoguanine triphosphatase	NUDT1	P36639
MOL001728	3-[ 2′ -( 5′ - hydroxymethyl) furyl ] -1 ( 2H) -isoquinolinone-7-O-BETA-D-glucoside_qt	C-C chemokine receptor type 9	CCR9	P51686
MOL001728	3-[ 2′ -( 5′ - hydroxymethyl) furyl ] -1 ( 2H) -isoquinolinone-7-O-BETA-D-glucoside_qt	C-C chemokine receptor type 2	CCR2	P41597
MOL001728	3-[ 2′ -( 5′ - hydroxymethyl) furyl ] -1 ( 2H) -isoquinolinone-7-O-BETA-D-glucoside_qt	Sodium channel protein type IX alpha subunit	SCN9A	Q15858
MOL001728	3-[ 2′ -( 5′ - hydroxymethyl) furyl ] -1 ( 2H) -isoquinolinone-7-O-BETA-D-glucoside_qt	RAS guanyl releasing protein 3	RASGRP3	Q8IV61
MOL001728	3-[ 2′ -( 5′ - hydroxymethyl) furyl ] -1 ( 2H) -isoquinolinone-7-O-BETA-D-glucoside_qt	Protein Wnt-3a	WNT3A	P56704
MOL001728	3-[ 2′ -( 5′ - hydroxymethyl) furyl ] -1 ( 2H) -isoquinolinone-7-O-BETA-D-glucoside_qt	Uridine phosphorylase 1 (by homology)	UPP1	Q16831
MOL001728	3-[ 2′ -( 5′ - hydroxymethyl) furyl ] -1 ( 2H) -isoquinolinone-7-O-BETA-D-glucoside_qt	Adenosylhomocysteinase 2	AHCYL1	O43865
MOL001728	3-[ 2′ -( 5′ - hydroxymethyl) furyl ] -1 ( 2H) -isoquinolinone-7-O-BETA-D-glucoside_qt	Low affinity neurotrophin receptor p75NTR	NGFR	P08138
MOL001728	3-[ 2′ -( 5′ - hydroxymethyl) furyl ] -1 ( 2H) -isoquinolinone-7-O-BETA-D-glucoside_qt	Endothelin receptor ET-B	EDNRB	P24530
MOL001728	3-[ 2′ -( 5′ - hydroxymethyl) furyl ] -1 ( 2H) -isoquinolinone-7-O-BETA-D-glucoside_qt	Threonyl-tRNA synthetase	TARS	P26639
MOL001728	3-[ 2′ -( 5′ - hydroxymethyl) furyl ] -1 ( 2H) -isoquinolinone-7-O-BETA-D-glucoside_qt	Proto-oncogene c-JUN	JUN	P05412
MOL001728	3-[ 2′ -( 5′ - hydroxymethyl) furyl ] -1 ( 2H) -isoquinolinone-7-O-BETA-D-glucoside_qt	Tyrosyl-tRNA synthetase	YARS	P54577
MOL001728	3-[ 2′ -( 5′ - hydroxymethyl) furyl ] -1 ( 2H) -isoquinolinone-7-O-BETA-D-glucoside_qt	Lysine-specific demethylase 5C	KDM5C	P41229
MOL001728	3-[ 2′ -( 5′ - hydroxymethyl) furyl ] -1 ( 2H) -isoquinolinone-7-O-BETA-D-glucoside_qt	EZH2/SUZ12/EED complex	EED SUZ12 EZH2	O75530 Q15022 Q15910
MOL001728	3-[ 2′ -( 5′ - hydroxymethyl) furyl ] -1 ( 2H) -isoquinolinone-7-O-BETA-D-glucoside_qt	EZH2/SUZ12/EED/RBBP7/RBBP4	RBBP4 RBBP7 EED SUZ12 EZH2	Q09028 Q16576 O75530 Q15022 Q15910
MOL001728	3-[ 2′ -( 5′ - hydroxymethyl) furyl ] -1 ( 2H) -isoquinolinone-7-O-BETA-D-glucoside_qt	Lysine-specific demethylase 4B	KDM4B	O94953
MOL001728	3-[ 2′ -( 5′ - hydroxymethyl) furyl ] -1 ( 2H) -isoquinolinone-7-O-BETA-D-glucoside_qt	Endoplasmic reticulum mannosyl-oligosaccharide 1,2-alpha-mannosidase	MAN1B1	Q9UKM7
MOL001734	3-[[(2R,3R,5R,6S)-3,5-dihydroxy-6-(1H-indol-3-yloxy)-4-oxooxan-2-yl]methoxy]-3-oxopropanoic acid	Sialidase 4	NEU4	Q8WWR8
MOL001734	3-[[(2R,3R,5R,6S)-3,5-dihydroxy-6-(1H-indol-3-yloxy)-4-oxooxan-2-yl]methoxy]-3-oxopropanoic acid	Caspase-1	CASP1	P29466
MOL001734	3-[[(2R,3R,5R,6S)-3,5-dihydroxy-6-(1H-indol-3-yloxy)-4-oxooxan-2-yl]methoxy]-3-oxopropanoic acid	Nucleotide-binding oligomerization domain-containing protein 2	NOD2	Q9HC29
MOL001734	3-[[(2R,3R,5R,6S)-3,5-dihydroxy-6-(1H-indol-3-yloxy)-4-oxooxan-2-yl]methoxy]-3-oxopropanoic acid	Endo-beta-N-acetylglucosaminidase	ENGASE	Q8NFI3
MOL001734	3-[[(2R,3R,5R,6S)-3,5-dihydroxy-6-(1H-indol-3-yloxy)-4-oxooxan-2-yl]methoxy]-3-oxopropanoic acid	Splicing factor 3B subunit 3	SF3B3	Q15393
MOL001734	3-[[(2R,3R,5R,6S)-3,5-dihydroxy-6-(1H-indol-3-yloxy)-4-oxooxan-2-yl]methoxy]-3-oxopropanoic acid	GAR transformylase	GART	P22102
MOL001734	3-[[(2R,3R,5R,6S)-3,5-dihydroxy-6-(1H-indol-3-yloxy)-4-oxooxan-2-yl]methoxy]-3-oxopropanoic acid	Proteasome Macropain subunit MB1	PSMB5	P28074
MOL001734	3-[[(2R,3R,5R,6S)-3,5-dihydroxy-6-(1H-indol-3-yloxy)-4-oxooxan-2-yl]methoxy]-3-oxopropanoic acid	Tyrosine-protein kinase ZAP-70	ZAP70	P43403
MOL001734	3-[[(2R,3R,5R,6S)-3,5-dihydroxy-6-(1H-indol-3-yloxy)-4-oxooxan-2-yl]methoxy]-3-oxopropanoic acid	Sialidase 2	NEU2	Q9Y3R4
MOL001734	3-[[(2R,3R,5R,6S)-3,5-dihydroxy-6-(1H-indol-3-yloxy)-4-oxooxan-2-yl]methoxy]-3-oxopropanoic acid	Asparagine synthetase	ASNS	P08243
MOL001734	3-[[(2R,3R,5R,6S)-3,5-dihydroxy-6-(1H-indol-3-yloxy)-4-oxooxan-2-yl]methoxy]-3-oxopropanoic acid	Histone-lysine N-methyltransferase, H3 lysine-79 specific	DOT1L	Q8TEK3
MOL001734	3-[[(2R,3R,5R,6S)-3,5-dihydroxy-6-(1H-indol-3-yloxy)-4-oxooxan-2-yl]methoxy]-3-oxopropanoic acid	DNA (cytosine-5)-methyltransferase 3B	DNMT3B	Q9UBC3
MOL001734	3-[[(2R,3R,5R,6S)-3,5-dihydroxy-6-(1H-indol-3-yloxy)-4-oxooxan-2-yl]methoxy]-3-oxopropanoic acid	Casein kinase II alpha (prime)	CSNK2A2	P19784
MOL001734	3-[[(2R,3R,5R,6S)-3,5-dihydroxy-6-(1H-indol-3-yloxy)-4-oxooxan-2-yl]methoxy]-3-oxopropanoic acid	Eukaryotic translation initation factor	EIF4E	P06730
MOL001734	3-[[(2R,3R,5R,6S)-3,5-dihydroxy-6-(1H-indol-3-yloxy)-4-oxooxan-2-yl]methoxy]-3-oxopropanoic acid	Breast cancer type 1 susceptibility protein	BRCA1	P38398
MOL001734	3-[[(2R,3R,5R,6S)-3,5-dihydroxy-6-(1H-indol-3-yloxy)-4-oxooxan-2-yl]methoxy]-3-oxopropanoic acid	ATP-citrate synthase	ACLY	P53396
MOL001734	3-[[(2R,3R,5R,6S)-3,5-dihydroxy-6-(1H-indol-3-yloxy)-4-oxooxan-2-yl]methoxy]-3-oxopropanoic acid	Aminopeptidase A	ENPEP	Q07075
MOL001734	3-[[(2R,3R,5R,6S)-3,5-dihydroxy-6-(1H-indol-3-yloxy)-4-oxooxan-2-yl]methoxy]-3-oxopropanoic acid	Phosphatidylinositol-4-phosphate 3-kinase C2 domain-containing subunit gamma	PIK3C2G	O75747
MOL001734	3-[[(2R,3R,5R,6S)-3,5-dihydroxy-6-(1H-indol-3-yloxy)-4-oxooxan-2-yl]methoxy]-3-oxopropanoic acid	Histone-lysine N-methyltransferase MLL	KMT2A	Q03164
MOL001734	3-[[(2R,3R,5R,6S)-3,5-dihydroxy-6-(1H-indol-3-yloxy)-4-oxooxan-2-yl]methoxy]-3-oxopropanoic acid	Histone-lysine N-methyltransferase SUV39H1	SUV39H1	O43463
MOL001734	3-[[(2R,3R,5R,6S)-3,5-dihydroxy-6-(1H-indol-3-yloxy)-4-oxooxan-2-yl]methoxy]-3-oxopropanoic acid	Indolethylamine N-methyltransferase	INMT	O95050
MOL001734	3-[[(2R,3R,5R,6S)-3,5-dihydroxy-6-(1H-indol-3-yloxy)-4-oxooxan-2-yl]methoxy]-3-oxopropanoic acid	N-lysine methyltransferase SMYD2	SMYD2	Q9NRG4
MOL001734	3-[[(2R,3R,5R,6S)-3,5-dihydroxy-6-(1H-indol-3-yloxy)-4-oxooxan-2-yl]methoxy]-3-oxopropanoic acid	EZH2/SUZ12/EED/RBBP7/RBBP4	EZH2	Q15910
MOL001734	3-[[(2R,3R,5R,6S)-3,5-dihydroxy-6-(1H-indol-3-yloxy)-4-oxooxan-2-yl]methoxy]-3-oxopropanoic acid	Histone-lysine N-methyltransferase EZH1	EZH1	Q92800
MOL001734	3-[[(2R,3R,5R,6S)-3,5-dihydroxy-6-(1H-indol-3-yloxy)-4-oxooxan-2-yl]methoxy]-3-oxopropanoic acid	Histone-lysine N-methyltransferase SETDB1	SETDB1	Q15047
MOL001734	3-[[(2R,3R,5R,6S)-3,5-dihydroxy-6-(1H-indol-3-yloxy)-4-oxooxan-2-yl]methoxy]-3-oxopropanoic acid	Histone-arginine methyltransferase CARM1	CARM1	Q86X55
MOL001755	24-Ethylcholest-4-en-3-one	Steroid 5-alpha-reductase 1	SRD5A1	P18405
MOL001755	24-Ethylcholest-4-en-3-one	3-keto-steroid reductase	HSD17B7	P56937
MOL001755	24-Ethylcholest-4-en-3-one	Probable G-protein coupled receptor 88	GPR88	Q9GZN0
MOL001755	24-Ethylcholest-4-en-3-one	Cholesteryl ester transfer protein	CETP	P11597
MOL001755	24-Ethylcholest-4-en-3-one	Kinesin-like protein 1	KIF11	P52732
MOL001755	24-Ethylcholest-4-en-3-one	Renin	REN	P00797
MOL001756	quindoline	C-C chemokine receptor type 8	CCR8	P51685
MOL001756	quindoline	Inhibitor of NF-kappa-B kinase (IKK)	CHUK	O15111
MOL001756	quindoline	Bcl-2-related protein A1 (by homology)	BCL2A1	Q16548
MOL001756	quindoline	Glutamate NMDA receptor; GRIN1/GRIN2B	GRIN1 GRIN2B	Q05586 Q13224
MOL001756	quindoline	Serotonin 3a (5-HT3a) receptor	HTR3A	P46098
MOL001756	quindoline	Serine/threonine-protein kinase haspin	HASPIN	Q8TF76
MOL001756	quindoline	Dual-specificity tyrosine-phosphorylation regulated kinase 2	DYRK2	Q92630
MOL001756	quindoline	Nitric-oxide synthase, brain	NOS1	P29475
MOL001756	quindoline	Nitric-oxide synthase, endothelial	NOS3	P29474
MOL001756	quindoline	Microtubule-associated protein 2	MAP2	P11137
MOL001756	quindoline	Urotensin II receptor	UTS2R	Q9UKP6
MOL001756	quindoline	Dual specificity tyrosine-phosphorylation-regulated kinase 4	DYRK4	Q9NR20
MOL001756	quindoline	Casein kinase I delta	CSNK1D	P48730
MOL001756	quindoline	Nischarin	NISCH	Q9Y2I1
MOL001756	quindoline	Dual-specificity tyrosine-phosphorylation regulated kinase 3	DYRK3	O43781
MOL001756	quindoline	Dual specificity protein kinase CLK2 (by homology)	CLK2	P49760
MOL001756	quindoline	Dual specificity protein kinase CLK4 (by homology)	CLK4	Q9HAZ1
MOL001767	hydroxyindirubin	Serine/threonine-protein kinase 17B	STK17B	O94768
MOL001767	hydroxyindirubin	Cyclin-dependent kinase 5/CDK5 activator 1	CDK5	Q00535
MOL001767	hydroxyindirubin	Serine/threonine-protein kinase 17A	STK17A	Q9UEE5
MOL001767	hydroxyindirubin	Death-associated protein kinase 3	DAPK3	O43293
MOL001767	hydroxyindirubin	Death-associated protein kinase 2	DAPK2	Q9UIK4
MOL001767	hydroxyindirubin	Elastase 1	CELA1	Q9UNI1
MOL001767	hydroxyindirubin	Mitogen-activated protein kinase 7	MAPK7	Q13164
MOL001767	hydroxyindirubin	Serine/threonine-protein kinase PAK 1	PAK1	Q13153
MOL001767	hydroxyindirubin	Cyclin-dependent kinase 5 regulatory subunit 1	CDK5R1	Q15078
MOL001767	hydroxyindirubin	Nicotinamide phosphoribosyltransferase	NAMPT	P43490
MOL001767	hydroxyindirubin	Adenylate cyclase type V	ADCY5	O95622
MOL001767	hydroxyindirubin	Palmitoleoyl-protein carboxylesterase NOTUM	NOTUM	Q6P988
MOL001767	hydroxyindirubin	CDC7/DBF4 (Cell division cycle 7-related protein kinase/Activator of S phase kinase)	DBF4 CDC7	Q9UBU7 O00311
MOL001767	hydroxyindirubin	NF-kappaB inhibitor alpha	NFKBIA	P25963
MOL001767	hydroxyindirubin	Hepatic lipase	LIPC	P11150
MOL001767	hydroxyindirubin	Endothelial lipase	LIPG	Q9Y5X9
MOL001769	beta-sitosterol dodecantate	Anti-estrogen binding site (AEBS)	EBP	Q15125
MOL001769	beta-sitosterol dodecantate	NACHT, LRR and PYD domains-containing protein 3	NLRP3	Q96P20
MOL001769	beta-sitosterol dodecantate	Neutral sphingomyelinase (by homology)	SMPD2	O60906
MOL001769	beta-sitosterol dodecantate	Ghrelin receptor	GHSR	Q92847
MOL001769	beta-sitosterol dodecantate	Calcium sensing receptor	CASR	P41180
MOL001769	beta-sitosterol dodecantate	Bradykinin B2 receptor	BDKRB2	P30411
MOL001769	beta-sitosterol dodecantate	Sphingosine 1-phosphate receptor Edg-3	S1PR3	Q99500
MOL001769	beta-sitosterol dodecantate	Ileal bile acid transporter	SLC10A2	Q12908
MOL001769	beta-sitosterol dodecantate	Aurora kinase B/Inner centromere protein	INCENP AURKB	Q9NQS7 Q96GD4
MOL001769	beta-sitosterol dodecantate	Alpha-1,6-mannosyl-glycoprotein 2-beta-N-acetylglucosaminyltransferase	MGAT2	Q10469
MOL001769	beta-sitosterol dodecantate	Diacylglycerol O-acyltransferase 2	DGAT2	Q96PD7
MOL001769	beta-sitosterol dodecantate	Proteasome subunit beta type-8	PSMB8	P28062
MOL001769	beta-sitosterol dodecantate	Proteasome Macropain subunit	PSMB2	P49721
MOL001774	Ineketone	Protein arginine N-methyltransferase 3	PRMT3	O60678
MOL001774	Ineketone	Period circadian protein homolog 2	PER2	O15055
MOL001774	Ineketone	Sulfonylurea receptor 2	ABCC9	O60706
MOL001774	Ineketone	Neuronal acetylcholine receptor; alpha3/beta4	CHRNA3 CHRNB4	P32297 P30926
MOL001774	Ineketone	Von Hippel-Lindau disease tumor suppressor/Elongin B/Elongin C	VHL	P40337
MOL001774	Ineketone	RAS guanyl-releasing protein 1 (by homology)	RASGRP1	O95267
MOL001774	Ineketone	JAK3/JAK1	JAK3 JAK1	P52333 P23458
MOL001779	Sinoacutine	Protein arginine N-methyltransferase 6	PRMT6	Q96LA8
MOL001779	Sinoacutine	Protein arginine N-methyltransferase 8	PRMT8	Q9NR22
MOL001779	Sinoacutine	Dopamine D5 receptor	DRD5	P21918
MOL001779	Sinoacutine	Peptide N-myristoyltransferase 1	NMT1	P30419
MOL001779	Sinoacutine	Melanin-concentrating hormone receptor 1	MCHR1	Q99705
MOL001779	Sinoacutine	Somatostatin receptor 4	SSTR4	P31391
MOL001779	Sinoacutine	Cytochrome P450 2D6	CYP2D6	P10635
MOL001779	Sinoacutine	Leukotriene A4 hydrolase	LTA4H	P09960
MOL001779	Sinoacutine	Serotonin 1d (5-HT1d) receptor	HTR1D	P28221
MOL001779	Sinoacutine	Lanosterol synthase	LSS	P48449
MOL001779	Sinoacutine	Proto-oncogene tyrosine-protein kinase MER	MERTK	Q12866
MOL001779	Sinoacutine	Cyclin-dependent kinase 9	CDK9	P50750
MOL001779	Sinoacutine	Serotonin 1f (5-HT1f) receptor	HTR1F	P30939
MOL001779	Sinoacutine	Neuronal acetylcholine receptor protein alpha-4 subunit	CHRNA4	P43681
MOL001779	Sinoacutine	Tyrosyl-DNA phosphodiesterase 1	TDP1	Q9NUW8
MOL001779	Sinoacutine	PH domain leucine-rich repeat-containing protein phosphatase 2	PHLPP2	Q6ZVD8
MOL001779	Sinoacutine	Baculoviral IAP repeat-containing protein 2	BIRC2	Q13490
MOL001779	Sinoacutine	Beta-1 adrenergic receptor	ADRB1	P08588
MOL001779	Sinoacutine	Amine oxidase, copper containing	AOC3	Q16853
MOL001779	Sinoacutine	Serotonin 1e (5-HT1e) receptor	HTR1E	P28566
MOL001779	Sinoacutine	Adrenergic receptor beta	ADRB2	P07550
MOL001779	Sinoacutine	PDZ-binding kinase	PBK	Q96KB5
MOL001781	Indigo	Urokinase plasminogen activator surface receptor	PLAUR	Q03405
MOL001781	Indigo	Glutaminyl-peptide cyclotransferase	QPCT	Q16769
MOL001781	Indigo	Serotonin 5a (5-HT5a) receptor	HTR5A	P47898
MOL001781	Indigo	Hexokinase type IV	GCK	P35557
MOL001781	Indigo	Toll-like receptor 4 (by homology)	TLR4	O00206
MOL001781	Indigo	1-acylglycerol-3-phosphate O-acyltransferase beta	AGPAT2	O15120
MOL001781	Indigo	G-protein coupled receptor 39	GPR39	O43194
MOL001782	(2Z)-2-(2-oxoindolin-3-ylidene)indolin-3-one	Bromodomain-containing protein 2	BRD2	P25440
MOL001782	(2Z)-2-(2-oxoindolin-3-ylidene)indolin-3-one	Bromodomain testis-specific protein	BRDT	Q58F21
MOL001782	(2Z)-2-(2-oxoindolin-3-ylidene)indolin-3-one	Bromodomain-containing protein 3	BRD3	Q15059
MOL001782	(2Z)-2-(2-oxoindolin-3-ylidene)indolin-3-one	Ubiquitin carboxyl-terminal hydrolase 10	USP10	Q14694
MOL001782	(2Z)-2-(2-oxoindolin-3-ylidene)indolin-3-one	Ubiquitin carboxyl-terminal hydrolase 13	USP13	Q92995
MOL001782	(2Z)-2-(2-oxoindolin-3-ylidene)indolin-3-one	Methyl-CpG-binding domain protein 2	MBD2	Q9UBB5
MOL001782	(2Z)-2-(2-oxoindolin-3-ylidene)indolin-3-one	Runt-related transcription factor 1/Core-binding factor subunit beta	CBFB	Q13951
MOL001782	(2Z)-2-(2-oxoindolin-3-ylidene)indolin-3-one	GABA transporter 1 (by homology)	SLC6A1	P30531
MOL001782	(2Z)-2-(2-oxoindolin-3-ylidene)indolin-3-one	Receptor protein-tyrosine kinase erbB-4	ERBB4	Q15303
MOL001782	(2Z)-2-(2-oxoindolin-3-ylidene)indolin-3-one	Tyrosine-protein kinase BMX	BMX	P51813
MOL001783	2-(9-((3-methyl-2-oxopent-3-en-1-yl)oxy)-2-oxo-1,2,8,9-tetrahydrofuro[2,3-h]quinolin-8-yl)propan-2-yl acetate	Arylamine N-acetyltransferase 1	NAT1	P18440
MOL001783	2-(9-((3-methyl-2-oxopent-3-en-1-yl)oxy)-2-oxo-1,2,8,9-tetrahydrofuro[2,3-h]quinolin-8-yl)propan-2-yl acetate	Amiloride-sensitive cation channel 3	ASIC3	Q9UHC3
MOL001783	2-(9-((3-methyl-2-oxopent-3-en-1-yl)oxy)-2-oxo-1,2,8,9-tetrahydrofuro[2,3-h]quinolin-8-yl)propan-2-yl acetate	Potassium channel subfamily K member 3	KCNK3	O14649
MOL001783	2-(9-((3-methyl-2-oxopent-3-en-1-yl)oxy)-2-oxo-1,2,8,9-tetrahydrofuro[2,3-h]quinolin-8-yl)propan-2-yl acetate	Bombesin receptor subtype-3	BRS3	P32247
MOL001783	2-(9-((3-methyl-2-oxopent-3-en-1-yl)oxy)-2-oxo-1,2,8,9-tetrahydrofuro[2,3-h]quinolin-8-yl)propan-2-yl acetate	Signal transducer and activator of transcription 5B	STAT5B	P51692
MOL001783	2-(9-((3-methyl-2-oxopent-3-en-1-yl)oxy)-2-oxo-1,2,8,9-tetrahydrofuro[2,3-h]quinolin-8-yl)propan-2-yl acetate	Geranylgeranyl transferase type I beta subunit	PGGT1B	P53609
MOL001783	2-(9-((3-methyl-2-oxopent-3-en-1-yl)oxy)-2-oxo-1,2,8,9-tetrahydrofuro[2,3-h]quinolin-8-yl)propan-2-yl acetate	Glucagon-like peptide 1 receptor	GLP1R	P43220
MOL001783	2-(9-((3-methyl-2-oxopent-3-en-1-yl)oxy)-2-oxo-1,2,8,9-tetrahydrofuro[2,3-h]quinolin-8-yl)propan-2-yl acetate	dUTP pyrophosphatase	DUT	P33316
MOL001783	2-(9-((3-methyl-2-oxopent-3-en-1-yl)oxy)-2-oxo-1,2,8,9-tetrahydrofuro[2,3-h]quinolin-8-yl)propan-2-yl acetate	Glutathione transferase omega 1	GSTO1	P78417
MOL001783	2-(9-((3-methyl-2-oxopent-3-en-1-yl)oxy)-2-oxo-1,2,8,9-tetrahydrofuro[2,3-h]quinolin-8-yl)propan-2-yl acetate	Muscle glycogen synthase	GYS1	P13807
MOL001783	2-(9-((3-methyl-2-oxopent-3-en-1-yl)oxy)-2-oxo-1,2,8,9-tetrahydrofuro[2,3-h]quinolin-8-yl)propan-2-yl acetate	Voltage-gated L-type calcium channel alpha-1C subunit	CACNA1C	Q13936
MOL001783	2-(9-((3-methyl-2-oxopent-3-en-1-yl)oxy)-2-oxo-1,2,8,9-tetrahydrofuro[2,3-h]quinolin-8-yl)propan-2-yl acetate	Heme oxygenase 1 (by homology)	HMOX1	P09601
MOL001790	Linarin	Neuromedin-U receptor 2	NMUR2	Q9GZQ4
MOL001790	Linarin	P47929	LGALS7	P47929
MOL001790	Linarin	NAD kinase	NADK	O95544
MOL001790	Linarin	CD22	CD22	P20273
MOL001790	Linarin	Protein-arginine deiminase type-3	PADI3	Q9ULW8
MOL001790	Linarin	Myelin-associated glycoprotein (by homology)	MAG	P20916
MOL001790	Linarin	Protein-arginine deiminase type-4	PADI4	Q9UM07
MOL001790	Linarin	Valyl-tRNA synthetase 2	VARS	P26640
MOL001790	Linarin	Leucyl-tRNA synthetase	LARS	Q9P2J5
MOL001790	Linarin	Isoleucyl-tRNA synthetase	IARS	P41252
MOL001790	Linarin	Ceramide glucosyltransferase	UGCG	Q16739
MOL001790	Linarin	Beta-glucosidase	GBA2	Q9HCG7
MOL001790	Linarin	GTPase NRas	NRAS	P01111
MOL001790	Linarin	Biotin--protein ligase	HLCS	P50747
MOL001790	Linarin	Fibronectin	FN1	P02751
MOL001790	Linarin	Sialidase 3	NEU3	Q9UQ49
MOL001792	DFV	Ribosomal protein S6 kinase alpha 5	RPS6KA5	O75582
MOL001792	DFV	Hepatocyte nuclear factor 4-alpha	HNF4A	P41235
MOL001792	DFV	CDK3/Cyclin E	CCNE1 CDK3	P24864 Q00526
MOL001803	Sinensetin	Bone morphogenetic protein 4 (by homology)	BMP4	P12644
MOL001804	Stigmasta-5,22-diene-3beta,7alpha-diol	Vitamin D-binding protein	GC	P02774
MOL001806	Stigmasta-5,22-diene-3beta,7beta-diol	Sonic hedgehog protein (by homology)	SHH	Q15465
MOL001806	Stigmasta-5,22-diene-3beta,7beta-diol	Interleukin-6 receptor subunit beta	IL6ST	P40189
MOL001810	6-(3-oxoindolin-2-ylidene)indolo[2,1-b]quinazolin-12-one	Potassium channel, inwardly rectifying, subfamily J, member 11	KCNJ11	Q14654
MOL001810	6-(3-oxoindolin-2-ylidene)indolo[2,1-b]quinazolin-12-one	Kir3.1/Kir3.4	KCNJ5 KCNJ3	P48544 P48549
MOL001810	6-(3-oxoindolin-2-ylidene)indolo[2,1-b]quinazolin-12-one	Kir3.1/Kir3.2	KCNJ6 KCNJ3	P48051 P48549
MOL001810	6-(3-oxoindolin-2-ylidene)indolo[2,1-b]quinazolin-12-one	Bcl2-antagonist of cell death (BAD)	BAD	Q92934
MOL001810	6-(3-oxoindolin-2-ylidene)indolo[2,1-b]quinazolin-12-one	Potassium channel subfamily K member 9	KCNK9	Q9NPC2
MOL001810	6-(3-oxoindolin-2-ylidene)indolo[2,1-b]quinazolin-12-one	Complement factor D	CFD	P00746
MOL001810	6-(3-oxoindolin-2-ylidene)indolo[2,1-b]quinazolin-12-one	Tyrosine-protein kinase FRK	FRK	P42685
MOL001810	6-(3-oxoindolin-2-ylidene)indolo[2,1-b]quinazolin-12-one	Epithelial discoidin domain-containing receptor 1	DDR1	Q08345
MOL001810	6-(3-oxoindolin-2-ylidene)indolo[2,1-b]quinazolin-12-one	Mitogen-activated protein kinase kinase kinase 12	MAP3K12	Q12852
MOL001810	6-(3-oxoindolin-2-ylidene)indolo[2,1-b]quinazolin-12-one	Discoidin domain-containing receptor 2	DDR2	Q16832
MOL001814	(E)-3-(3,5-dimethoxy-4-hydroxy-benzylidene)-2-indolinone	Casein kinase I alpha	CSNK1A1	P48729
MOL001814	(E)-3-(3,5-dimethoxy-4-hydroxy-benzylidene)-2-indolinone	Casein kinase I epsilon	CSNK1E	P49674
MOL001814	(E)-3-(3,5-dimethoxy-4-hydroxy-benzylidene)-2-indolinone	L-lactate dehydrogenase A chain	LDHA	P00338
MOL001814	(E)-3-(3,5-dimethoxy-4-hydroxy-benzylidene)-2-indolinone	Serine/threonine-protein kinase PLK2	PLK2	Q9NYY3
MOL001814	(E)-3-(3,5-dimethoxy-4-hydroxy-benzylidene)-2-indolinone	Egl nine homolog 3	EGLN3	Q9H6Z9
MOL001814	(E)-3-(3,5-dimethoxy-4-hydroxy-benzylidene)-2-indolinone	CCR4-NOT transcription complex subunit 7	CNOT7	Q9UIV1
MOL001814	(E)-3-(3,5-dimethoxy-4-hydroxy-benzylidene)-2-indolinone	Serine/threonine-protein kinase SRPK1	SRPK1	Q96SB4
MOL001814	(E)-3-(3,5-dimethoxy-4-hydroxy-benzylidene)-2-indolinone	Baculoviral IAP repeat-containing protein 5	BIRC5	O15392
MOL001833	Glucobrassicin-1-Sulfonate_qt	Serotonin 1b (5-HT1b) receptor	HTR1B	P28222
MOL012207	lobelanidine	Synaptic vesicular amine transporter	SLC18A2	Q05940
MOL012207	lobelanidine	Vesicular acetylcholine transporter	SLC18A3	Q16572
MOL012207	lobelanidine	Nociceptin receptor	OPRL1	P41146
MOL012207	lobelanidine	Neuronal acetylcholine receptor; alpha4/beta2	CHRNA4 CHRNB2	P43681 P17787
MOL012207	lobelanidine	Glutamate [NMDA] receptor subunit epsilon 2	GRIN2B	Q13224
MOL012207	lobelanidine	Phosphodiesterase 1C	PDE1C	Q14123
MOL012207	lobelanidine	C-C chemokine receptor type 3	CCR3	P51677
MOL012207	lobelanidine	ATP-sensitive inward rectifier potassium channel 1	KCNJ1	P48048
MOL012207	lobelanidine	Transient receptor potential cation channel subfamily V member 3	TRPV3	Q8NET8
MOL012207	lobelanidine	Protein delta homolog 1	DLK1	P80370
MOL012207	lobelanidine	Rho-associated protein kinase	ROCK2 ROCK1	O75116 Q13464
MOL012207	lobelanidine	Phosphodiesterase 8B	PDE8B	O95263
MOL012207	lobelanidine	Serotonin 4 (5-HT4) receptor	HTR4	Q13639
MOL012207	lobelanidine	Inhibitor of nuclear factor kappa B kinase epsilon subunit	IKBKE	Q14164
MOL012207	lobelanidine	Serine/threonine-protein kinase TBK1	TBK1	Q9UHD2
MOL012208	Lobelanine	Phospholipase D1	PLD1	Q13393
MOL012208	Lobelanine	Phospholipase D2	PLD2	O14939
MOL012208	Lobelanine	Protein kinase N2	PKN2	Q16513
MOL012208	Lobelanine	Potassium/sodium hyperpolarization-activated cyclic nucleotide-gated channel 4	HCN4	Q9Y3Q4
MOL012208	Lobelanine	Potassium/sodium hyperpolarization-activated cyclic nucleotide-gated channel 1	HCN1	O60741
MOL012208	Lobelanine	DNA-directed RNA polymerase I subunit RPA1	POLR1A	O95602
MOL012208	Lobelanine	Neuropeptides B/W receptor type 1 (by homology)	NPBWR1	P48145
MOL012208	Lobelanine	Somatostatin receptor 5	SSTR5	P35346
MOL012208	Lobelanine	Sphingosine-1-phosphate lyase 1	SGPL1	O95470
MOL012208	Lobelanine	Voltage-gated T-type calcium channel alpha-1H subunit	CACNA1H	O95180
MOL012208	Lobelanine	Serine/threonine-protein kinase PAK 4	PAK4	O96013
MOL012208	Lobelanine	Transcriptional regulator ERG	ERG	P11308
MOL012208	Lobelanine	Nuclear receptor subfamily 1 group D member 1	NR1D1	P20393
MOL012208	Lobelanine	C-X-C chemokine receptor type 7	ACKR3	P25106
MOL012208	Lobelanine	Poly [ADP-ribose] polymerase 3	PARP3	Q9Y6F1
MOL012209	2-[(2R,6S)-6-[(2R)-2-hydroxy-2-phenylethyl]-1-methylpiperidin-2-yl]-1-phenylethanone	Sodium channel protein type I alpha subunit	SCN1A	P35498
MOL012209	2-[(2R,6S)-6-[(2R)-2-hydroxy-2-phenylethyl]-1-methylpiperidin-2-yl]-1-phenylethanone	S-methyl-5-thioadenosine phosphorylase	MTAP	Q13126
MOL012209	2-[(2R,6S)-6-[(2R)-2-hydroxy-2-phenylethyl]-1-methylpiperidin-2-yl]-1-phenylethanone	Histone H1.0	H1F0	P07305
MOL012209	2-[(2R,6S)-6-[(2R)-2-hydroxy-2-phenylethyl]-1-methylpiperidin-2-yl]-1-phenylethanone	Beta-3 adrenergic receptor	ADRB3	P13945
MOL012209	2-[(2R,6S)-6-[(2R)-2-hydroxy-2-phenylethyl]-1-methylpiperidin-2-yl]-1-phenylethanone	Tyrosine-protein kinase YES	YES1	P07947
MOL012209	2-[(2R,6S)-6-[(2R)-2-hydroxy-2-phenylethyl]-1-methylpiperidin-2-yl]-1-phenylethanone	Voltage-gated potassium channel subunit Kv7.1	KCNQ1	P51787
MOL012209	2-[(2R,6S)-6-[(2R)-2-hydroxy-2-phenylethyl]-1-methylpiperidin-2-yl]-1-phenylethanone	Coagulation factor V	F5	P12259
MOL012209	2-[(2R,6S)-6-[(2R)-2-hydroxy-2-phenylethyl]-1-methylpiperidin-2-yl]-1-phenylethanone	Neuronal acetylcholine receptor; alpha3/beta2	CHRNA3 CHRNB2	P32297 P17787
MOL012209	2-[(2R,6S)-6-[(2R)-2-hydroxy-2-phenylethyl]-1-methylpiperidin-2-yl]-1-phenylethanone	G-protein coupled receptor 4	GPR4	P46093
MOL012209	2-[(2R,6S)-6-[(2R)-2-hydroxy-2-phenylethyl]-1-methylpiperidin-2-yl]-1-phenylethanone	Neuronal acetylcholine receptor; alpha3/alpha6/beta2/beta3	CHRNB3 CHRNA6 CHRNB2 CHRNA3	Q05901 Q15825 P17787 P32297
MOL012216	norlobelanine	Tyrosine-protein kinase Lyn	LYN	P07948
MOL012216	norlobelanine	Probable G-protein coupled receptor 142	GPR142	Q7Z601
MOL012225	3-[(2S,3R)-2-(4-hydroxy-3-methoxy-phenyl)-3-(hydroxymethyl)-7-methoxy-2,3-dihydrobenzofuran-5-yl]propyl acetate	Proliferating cell nuclear antigen	PCNA	P12004
MOL012225	3-[(2S,3R)-2-(4-hydroxy-3-methoxy-phenyl)-3-(hydroxymethyl)-7-methoxy-2,3-dihydrobenzofuran-5-yl]propyl acetate	Perforin-1	PRF1	P14222
MOL012225	3-[(2S,3R)-2-(4-hydroxy-3-methoxy-phenyl)-3-(hydroxymethyl)-7-methoxy-2,3-dihydrobenzofuran-5-yl]propyl acetate	Serine/threonine-protein kinase GAK	GAK	O14976
MOL012225	3-[(2S,3R)-2-(4-hydroxy-3-methoxy-phenyl)-3-(hydroxymethyl)-7-methoxy-2,3-dihydrobenzofuran-5-yl]propyl acetate	Eukaryotic translation initiation factor 2-alpha kinase 3	EIF2AK3	Q9NZJ5
MOL012225	3-[(2S,3R)-2-(4-hydroxy-3-methoxy-phenyl)-3-(hydroxymethyl)-7-methoxy-2,3-dihydrobenzofuran-5-yl]propyl acetate	Mammalian target of Rapamycin (mTORC1)	FKBP1A MTOR	P62942 P42345
MOL012225	3-[(2S,3R)-2-(4-hydroxy-3-methoxy-phenyl)-3-(hydroxymethyl)-7-methoxy-2,3-dihydrobenzofuran-5-yl]propyl acetate	CDK2/Cyclin A	CCNA2 CDK2	P20248 P24941
MOL012225	3-[(2S,3R)-2-(4-hydroxy-3-methoxy-phenyl)-3-(hydroxymethyl)-7-methoxy-2,3-dihydrobenzofuran-5-yl]propyl acetate	Serine/threonine-protein kinase AKT2	AKT2	P31751
MOL012225	3-[(2S,3R)-2-(4-hydroxy-3-methoxy-phenyl)-3-(hydroxymethyl)-7-methoxy-2,3-dihydrobenzofuran-5-yl]propyl acetate	Motilin receptor	MLNR	O43193
MOL012225	3-[(2S,3R)-2-(4-hydroxy-3-methoxy-phenyl)-3-(hydroxymethyl)-7-methoxy-2,3-dihydrobenzofuran-5-yl]propyl acetate	TAK1/TAB1	TAB1 MAP3K7	Q15750 O43318
MOL012225	3-[(2S,3R)-2-(4-hydroxy-3-methoxy-phenyl)-3-(hydroxymethyl)-7-methoxy-2,3-dihydrobenzofuran-5-yl]propyl acetate	Mitogen-activated protein kinase kinase kinase 7	MAP3K7	O43318
MOL012225	3-[(2S,3R)-2-(4-hydroxy-3-methoxy-phenyl)-3-(hydroxymethyl)-7-methoxy-2,3-dihydrobenzofuran-5-yl]propyl acetate	Mitogen-activated protein kinase kinase kinase 9	MAP3K9	P80192
MOL012225	3-[(2S,3R)-2-(4-hydroxy-3-methoxy-phenyl)-3-(hydroxymethyl)-7-methoxy-2,3-dihydrobenzofuran-5-yl]propyl acetate	Tyrosine-protein kinase TXK	TXK	P42681
MOL012225	3-[(2S,3R)-2-(4-hydroxy-3-methoxy-phenyl)-3-(hydroxymethyl)-7-methoxy-2,3-dihydrobenzofuran-5-yl]propyl acetate	PI3K p110 beta/p85 alpha	PIK3R1 PIK3CB	P27986 P42338
MOL009653	Cycloeucalenol	Methionine aminopeptidase 1	METAP1	P53582
MOL009653	Cycloeucalenol	Sphingosine 1-phosphate receptor Edg-1	S1PR1	P21453
MOL009653	Cycloeucalenol	25-hydroxyvitamin D-1 alpha hydroxylase, mitochondrial	CYP27B1	O15528
MOL009009	(+)-medioresinol	Phosphatidylinositol 3-kinase catalytic subunit type 3	PIK3C3	Q8NEB9
MOL009009	(+)-medioresinol	Kynurenine 3-monooxygenase (by homology)	KMO	O15229
MOL009009	(+)-medioresinol	Beta-1,4-mannosyl-glycoprotein 4-beta-N-acetylglucosaminyltransferase	MGAT3	Q09327
MOL009009	(+)-medioresinol	Maternal embryonic leucine zipper kinase	MELK	Q14680
MOL009009	(+)-medioresinol	Monoacylglycerol lipase ABHD6 (by homology)	ABHD6	Q9BV23
MOL005923	3,23-dihydroxy-12-oleanen-28-oic acid	Eukaryotic translation initiation factor 2-alpha kinase 1	EIF2AK1	Q9BQI3
MOL005923	3,23-dihydroxy-12-oleanen-28-oic acid	Programmed cell death 1 ligand 1	CD274	Q9NZQ7
MOL005923	3,23-dihydroxy-12-oleanen-28-oic acid	Ectonucleoside triphosphate diphosphohydrolase 2	ENTPD2	Q9Y5L3
MOL005923	3,23-dihydroxy-12-oleanen-28-oic acid	Serine/threonine-protein kinase PLK3	PLK3	Q9H4B4
MOL005923	3,23-dihydroxy-12-oleanen-28-oic acid	Lactase-phlorizin hydrolase	LCT	P09848
MOL005923	3,23-dihydroxy-12-oleanen-28-oic acid	G-protein coupled receptor 55	GPR55	Q9Y2T6
MOL005923	3,23-dihydroxy-12-oleanen-28-oic acid	Protein-tyrosine phosphatase LC-PTP	PTPN7	P35236
MOL005916	irisolidone	Serum paraoxonase/arylesterase 1	PON1	P27169
MOL005916	irisolidone	G-protein coupled receptor 84	GPR84	Q9NQS5
MOL005884	patchoulan 1,12-diol	Tubulin--tyrosine ligase	TTL	Q8NG68
MOL005884	patchoulan 1,12-diol	Cell division protein kinase 8	CDK8	P49336
MOL005922	Acanthoside B	Leukocyte adhesion glycoprotein LFA-1 alpha	ITGAL	P20701
MOL005922	Acanthoside B	Eukaryotic initiation factor 4A-I	EIF4A1	P60842
MOL005922	Acanthoside B	Pancreatic alpha-amylase	AMY2A	P04746
MOL005922	Acanthoside B	Serine/threonine protein phosphatase PP1-alpha catalytic subunit	PPP1CA	P62136
MOL005922	Acanthoside B	Growth factor receptor-bound protein 2	GRB2	P62993
MOL005922	Acanthoside B	Enteropeptidase	TMPRSS15	P98073
MOL005921	quercetin 7-O-β-D-glucoside	Eukaryotic translation initiation factor 4H	EIF4H	Q15056
MOL005911	5-Hydroxy-7,4'-dimethoxyflavanon	Signal transducer and activator of transcription 6	STAT6	P42226
MOL005911	5-Hydroxy-7,4'-dimethoxyflavanon	Secreted frizzled-related protein 1	SFRP1	Q8N474
MOL005911	5-Hydroxy-7,4'-dimethoxyflavanon	Matrix metalloproteinase 26	MMP26	Q9NRE1
MOL005911	5-Hydroxy-7,4'-dimethoxyflavanon	ADAM9	ADAM9	Q13443
MOL005911	5-Hydroxy-7,4'-dimethoxyflavanon	Histone deacetylase 3/NCoR1	NCOR1 HDAC3	O75376 O15379
MOL005890	pachypodol	Serine/threonine-protein kinase Nek1	NEK1	Q96PY6
MOL005890	pachypodol	Cystinyl aminopeptidase	LNPEP	Q9UIQ6
MOL005890	pachypodol	Matrix metalloproteinase 25	MMP25	Q9NPA2
MOL005890	pachypodol	Ephrin type-B receptor 2	EPHB2	P29323
MOL005890	pachypodol	ADAM10	ADAM10	O14672
MOL005890	pachypodol	Serine-protein kinase ATR	ATR	Q13535
MOL005890	pachypodol	Fatty acid synthase	FASN	P49327
MOL005890	pachypodol	15-hydroxyprostaglandin dehydrogenase [NAD+]	HPGD	P15428
MOL002776	Baicalin	DNA polymerase gamma subunit 1	POLG	P54098
MOL002776	Baicalin	Inositol 1,4,5-trisphosphate receptor type 1	ITPR1	Q14643
MOL002776	Baicalin	DNA polymerase delta subunit 1	POLD1	P28340
MOL002776	Baicalin	Basic fibroblast growth factor	FGF2	P09038
MOL002776	Baicalin	Pyrimidinergic receptor P2Y4	P2RY4	P51582
MOL002776	Baicalin	Purinergic receptor P2Y2	P2RY2	P41231
MOL002776	Baicalin	Pyrimidinergic receptor P2Y6	P2RY6	Q15077
MOL002776	Baicalin	Folate receptor alpha	FOLR1	P15328
MOL002776	Baicalin	Aminopeptidase N	ANPEP	P15144
MOL002776	Baicalin	Leucine aminopeptidase	LAP3	P28838
MOL002776	Baicalin	Endoplasmic reticulum aminopeptidase 2	ERAP2	Q6P179
MOL002776	Baicalin	Endoplasmic reticulum aminopeptidase 1	ERAP1	Q9NZ08
MOL002776	Baicalin	Purinergic receptor P2Y11	P2RY11	Q96G91
MOL001973	Sitosteryl acetate	Phosphodiesterase 3	PDE3A	Q14432
MOL001973	Sitosteryl acetate	Phosphodiesterase 3B	PDE3B	Q13370
MOL001973	Sitosteryl acetate	Voltage-gated calcium channel alpha2/delta subunit 1	CACNA2D1	P54289
MOL001973	Sitosteryl acetate	Neuropeptide Y receptor type 2	NPY2R	P49146
MOL001973	Sitosteryl acetate	Cytochrome P450 26A1	CYP26A1	O43174
MOL001973	Sitosteryl acetate	Peptidyl-prolyl cis-trans isomerase D	PPID	Q08752
MOL001973	Sitosteryl acetate	Cyclophilin B	PPIB	P23284
MOL001973	Sitosteryl acetate	Peptidyl-prolyl cis-trans isomerase G	PPIG	Q13427
MOL001973	Sitosteryl acetate	Nucleotide-binding oligomerization domain-containing protein 1	NOD1	Q9Y239
MOL001973	Sitosteryl acetate	UDP-N-acetylglucosamine--peptide N-acetylglucosaminyltransferase 110 kDa subunit	OGT	O15294
MOL012269	Stigmasta-5,22-dien-3-ol-acetate	Chymotrypsin C	CTRC	Q99895
MOL012269	Stigmasta-5,22-dien-3-ol-acetate	Glucokinase regulatory protein	GCKR	Q14397
MOL012269	Stigmasta-5,22-dien-3-ol-acetate	Protein-glutamine gamma-glutamyltransferase K	TGM1	P22735
MOL012269	Stigmasta-5,22-dien-3-ol-acetate	Coagulation factor XIII	F13A1	P00488
MOL012269	Stigmasta-5,22-dien-3-ol-acetate	Acetyl-CoA carboxylase 1	ACACA	Q13085
MOL012269	Stigmasta-5,22-dien-3-ol-acetate	Plasma retinol-binding protein	RBP4	P02753
MOL012269	Stigmasta-5,22-dien-3-ol-acetate	Endothelial PAS domain-containing protein 1	EPAS1	Q99814
MOL012270	Stigmastan-3,5,22-triene	Aldehyde dehydrogenase 1A1	ALDH1A1	P00352
MOL012270	Stigmastan-3,5,22-triene	Kinesin-like protein KIF20A	KIF20A	O95235
MOL012270	Stigmastan-3,5,22-triene	Retinoid X receptor gamma (by homology)	RXRG	P48443
MOL012270	Stigmastan-3,5,22-triene	Retinoid X receptor beta	RXRB	P28702
MOL012270	Stigmastan-3,5,22-triene	Protein arginine N-methyltransferase 5	PRMT5	O14744
MOL012270	Stigmastan-3,5,22-triene	Aldehyde dehydrogenase dimeric NADP-preferring	ALDH3A1	P30838
MOL001484	Inermine	Phospholipase A-2-activating protein	PLAA	Q9Y263
MOL001484	Inermine	Arachidonate 15-lipoxygenase, type II	ALOX15B	O15296
MOL003627	sophocarpine	Solute carrier family 22 member 2	SLC22A2	O15244
MOL003627	sophocarpine	Multidrug and toxin extrusion protein 1	SLC47A1	Q96FL8
MOL003627	sophocarpine	Serotonin 3 (5-HT3) receptor	HTR3B HTR3A	O95264 P46098
MOL003627	sophocarpine	Prion protein	PRNP	P04156
MOL003627	sophocarpine	Acetylcholine receptor; alpha1/beta1/delta/gamma	CHRNB1 CHRNA1 CHRNG CHRND	P11230 P02708 P07510 Q07001
MOL003627	sophocarpine	Voltage-gated T-type calcium channel alpha-1G subunit	CACNA1G	O43497
MOL003627	sophocarpine	Somatostatin receptor 3	SSTR3	P32745
MOL003627	sophocarpine	Proteinase activated receptor 4	F2RL3	Q96RI0
MOL003627	sophocarpine	Rho GDP-dissociation inhibitor 1	ARHGDIA	P52565
MOL003676	Sophoramine	Neuronal acetylcholine receptor subunit alpha-3	CHRNA3	P32297
MOL003676	Sophoramine	Protein kinase C mu	PRKD1	Q15139
MOL003676	Sophoramine	Serine/threonine-protein kinase PRKX	PRKX	P51817
MOL003680	sophoridine	Polyamine oxidase	PAOX	Q6QHF9
MOL003680	sophoridine	Aminopeptidase B	RNPEP	Q9H4A4
MOL003680	sophoridine	Aspartyl aminopeptidase	DNPEP	Q9ULA0
MOL003680	sophoridine	Alcohol dehydrogenase alpha chain	ADH1A	P07327
MOL003680	sophoridine	Alcohol dehydrogenase gamma chain	ADH1C	P00326
MOL003680	sophoridine	Phospholipase A2 group IIC	PLA2G2C	Q5R387
MOL006561	(+)-14alpha-hydroxymatrine	Metabotropic glutamate receptor 3	GRM3	Q14832
MOL006561	(+)-14alpha-hydroxymatrine	Metabotropic glutamate receptor 8	GRM8	O00222
MOL006561	(+)-14alpha-hydroxymatrine	Metabotropic glutamate receptor 6	GRM6	O15303
MOL006561	(+)-14alpha-hydroxymatrine	Neuronal acetylcholine receptor; alpha2/beta4	CHRNB4 CHRNA2	P30926 Q15822
MOL006561	(+)-14alpha-hydroxymatrine	Nicotinic acetylcholine receptor alpha4/beta2/alpha5	CHRNA5 CHRNB2 CHRNA4	P30532 P17787 P43681
MOL006561	(+)-14alpha-hydroxymatrine	Xaa-Pro aminopeptidase 1	XPNPEP1	Q9NQW7
MOL006561	(+)-14alpha-hydroxymatrine	Xaa-Pro dipeptidase	PEPD	P12955
MOL006561	(+)-14alpha-hydroxymatrine	Xaa-Pro aminopeptidase 2	XPNPEP2	O43895
MOL006561	(+)-14alpha-hydroxymatrine	Phenylethanolamine N-methyltransferase	PNMT	P11086
MOL006561	(+)-14alpha-hydroxymatrine	Pepsinogen C (by homology)	PGC	P20142
MOL006561	(+)-14alpha-hydroxymatrine	Dipeptidyl peptidase I	CTSC	P53634
MOL006561	(+)-14alpha-hydroxymatrine	Neuronal acetylcholine receptor; alpha4/beta4	CHRNB4 CHRNA4	P30926 P43681
MOL006561	(+)-14alpha-hydroxymatrine	Acetylcholine receptor protein epsilon chain	CHRNE	Q04844
MOL006561	(+)-14alpha-hydroxymatrine	Acyl-CoA:dihydroxyacetonephosphateacyltransferase	GNPAT	O15228
MOL006562	(+)-7,11-dehydromatrine,(leontalbinine)	3-beta-hydroxysteroid dehydrogenase/delta 5-->4-isomerase type I	HSD3B1	P14060
MOL006562	(+)-7,11-dehydromatrine,(leontalbinine)	Thyrotropin-releasing hormone receptor (by homology)	TRHR	P34981
MOL006563	(+)-9alpha-hydroxymatrine	Phosphodiesterase 11A	PDE11A	Q9HCR9
MOL006563	(+)-9alpha-hydroxymatrine	Bromodomain adjacent to zinc finger domain protein 2B	BAZ2B	Q9UIF8
MOL006563	(+)-9alpha-hydroxymatrine	Bromodomain adjacent to zinc finger domain protein 2A	BAZ2A	Q9UIF9
MOL006572	1,4-diazaindan-type,alkaloid,flavascensine	Voltage-gated T-type calcium channel alpha-1I subunit	CACNA1I	Q9P0X4
MOL006572	1,4-diazaindan-type,alkaloid,flavascensine	Cathepsin (H and K)	CTSH	P09668
MOL006572	1,4-diazaindan-type,alkaloid,flavascensine	Peregrin	BRPF1	P55201
MOL006572	1,4-diazaindan-type,alkaloid,flavascensine	Prolactin-releasing peptide receptor	PRLHR	P49683
MOL006572	1,4-diazaindan-type,alkaloid,flavascensine	LDL receptor	LDLR	P01130
MOL006582	5α,9α-dihydroxymatrine	Alpha-mannosidase 2A1	MAN2A1	Q16706
MOL006596	Glyceollin	Phosphatidylinositol-4-phosphate 3-kinase C2 domain-containing beta polypeptide	PIK3C2B	O00750
MOL006596	Glyceollin	Tyrosine kinase non-receptor protein 2	TNK2	Q07912
MOL006596	Glyceollin	Phosphatidylinositol-4-phosphate 3-kinase C2 domain-containing subunit alpha	PIK3C2A	O00443
MOL006596	Glyceollin	Bromodomain-containing protein 1	BRD1	O95696
MOL003347	hyperforin	Prostaglandin E synthase 2	PTGES2	Q9H7Z7
MOL003347	hyperforin	L-lactate dehydrogenase B chain	LDHB	P07195
MOL003347	hyperforin	Mitogen-activated protein kinase kinase kinase 5	MAP3K5	Q99683
MOL003347	hyperforin	Integrin alpha-4	ITGA4	P13612
MOL003347	hyperforin	Formyl peptide receptor 1	FPR1	P21462
MOL003347	hyperforin	Matrix metalloproteinase 11 (by homology)	MMP11	P24347
MOL003347	hyperforin	Sn1-specific diacylglycerol lipase beta	DAGLB	Q8NCG7
MOL006613	kushenin	CDGSH iron-sulfur domain-containing protein 1	CISD1	Q9NZ45
MOL006619	kushenol J	Solute carrier family 28 member 3	SLC28A3	Q9HAS3
MOL006619	kushenol J	Tyrosyl-DNA phosphodiesterase 2	TDP2	O95551
MOL006622	kushenol O	Probable G-protein coupled receptor 174	GPR174	Q9BXC1
MOL006622	kushenol O	Probable G-protein coupled receptor 34 (by homology)	GPR34	Q9UPC5
MOL006622	kushenol O	Putative P2Y purinoceptor 10 (by homology)	P2RY10	O00398
MOL006623	kushenol,t	DNA polymerase kappa	POLK	Q9UBT6
MOL006623	kushenol,t	Proto-oncogene tyrosine-protein kinase ROS	ROS1	P08922
MOL006626	leachianone,g	Dual specificity protein kinase CLK3 (by homology)	CLK3	P49761
MOL000456	Phaseolin	Serine/threonine-protein kinase TNNI3K	TNNI3K	Q59H18
MOL000456	Phaseolin	NADPH oxidase 1	NOX1	Q9Y5S8
MOL006650	(-)-Maackiain-3-O-glucosyl-6'-O-malonate	Proton-coupled folate transporter	SLC46A1	Q96NT5
MOL006650	(-)-Maackiain-3-O-glucosyl-6'-O-malonate	Folate transporter 1	SLC19A1	P41440
MOL006650	(-)-Maackiain-3-O-glucosyl-6'-O-malonate	Serine/threonine protein phosphatase 2A, catalytic subunit, alpha isoform	PPP2CA	P67775
MOL006650	(-)-Maackiain-3-O-glucosyl-6'-O-malonate	Bifunctional methylenetetrahydrofolate dehydrogenase/cyclohydrolase, mitochondrial	MTHFD2	P13995
MOL006650	(-)-Maackiain-3-O-glucosyl-6'-O-malonate	Folate receptor beta	FOLR2	P14207
MOL006650	(-)-Maackiain-3-O-glucosyl-6'-O-malonate	Integrin alpha-2/beta-3	ITGA2 ITGB3	P17301 P05106
MOL006650	(-)-Maackiain-3-O-glucosyl-6'-O-malonate	Disks large homolog 4	DLG4	P78352
MOL006652	trifolrhizin	Methionyl-tRNA synthetase	MARS	P56192
MOL006652	trifolrhizin	Histidyl-tRNA synthetase	HARS	P12081
MOL006652	trifolrhizin	Ribonuclease H1	RNASEH1	O60930
MOL006652	trifolrhizin	Galactokinase	GALK1	P51570
MOL006652	trifolrhizin	Protein arginine N-methyltransferase 7	PRMT7	Q9NVM4
MOL006652	trifolrhizin	Serum albumin	ALB	P02768
MOL001454	berberine	Putative hydrolase RBBP9	RBBP9	O75884
MOL001454	berberine	ATPase family AAA domain-containing protein 2	ATAD2	Q6PL18
MOL001454	berberine	WD repeat-containing protein 5	WDR5	P61964
MOL001454	berberine	CaM kinase II	CAMK2D	Q13557
MOL013352	Obacunone	Centromere-associated protein E	CENPE	Q02224
MOL013352	Obacunone	Sorbitol dehydrogenase	SORD	Q00796
MOL002897	epiberberine	Baculoviral IAP repeat-containing protein 3	BIRC3	Q13489
MOL002903	(R)-Canadine	Glutamate receptor ionotropic, AMPA 1	GRIA1	P42261
MOL002903	(R)-Canadine	Excitatory amino acid transporter 1	SLC1A3	P43003
MOL002903	(R)-Canadine	Queuine tRNA-ribosyltransferase	QTRT1	Q9BXR0
MOL002904	Berlambine	Ras-related C3 botulinum toxin substrate 1	RAC1	P63000
MOL002904	Berlambine	Phosphoglycerate kinase 1	PGK1	P00558
MOL002904	Berlambine	Cell division control protein 42 homolog	CDC42	P60953
MOL002907	Corchoroside A_qt	Proteinase-activated receptor 2	F2RL1	P55085
MOL002907	Corchoroside A_qt	Programmed cell death protein 4	PDCD4	Q53EL6
MOL002907	Corchoroside A_qt	Sodium/potassium-transporting ATPase alpha-1 chain	ATP1A1	P05023
MOL002907	Corchoroside A_qt	Alcohol dehydrogenase class III	ADH5	P11766
MOL002907	Corchoroside A_qt	Serine/threonine protein phosphatase PP1-gamma catalytic subunit	PPP1CC	P36873
MOL000622	Magnograndiolide	Lysosomal acid lipase/cholesteryl ester hydrolase	LIPA	P38571
MOL000622	Magnograndiolide	Sulfonylurea receptor 2, Kir6.2	KCNJ11 ABCC9	Q14654 O60706
MOL000622	Magnograndiolide	Toll-like receptor 8	TLR8	Q9NR97
MOL000622	Magnograndiolide	Toll-like receptor (TLR7/TLR9)	TLR7	Q9NYK1
MOL000622	Magnograndiolide	Presenilin 1	PSEN1	P49768
MOL000622	Magnograndiolide	Presenilin 2	PSEN2	P49810
MOL000762	Palmidin A	Brain adenylate cyclase 1	ADCY1	Q08828
MOL000762	Palmidin A	Mitogen-activated protein kinase kinase kinase 1	MAP3K1	Q13233
MOL000785	palmatine	Tyrosine-protein kinase TIE-2	TEK	Q02763
MOL000785	palmatine	Macrophage-stimulating protein receptor	MST1R	Q04912
MOL000785	palmatine	TGF-beta receptor type II	TGFBR2	P37173
MOL000785	palmatine	Lysyl-tRNA synthetase	KARS	Q15046
MOL000785	palmatine	Serine/threonine-protein kinase MARK1	MARK1	Q9P0L2
MOL000785	palmatine	Lipoxin A4 receptor	FPR2	P25090
MOL008647	Moupinamide	Heat shock protein 75 kDa, mitochondrial	TRAP1	Q12931
MOL008647	Moupinamide	Ephrin type-A receptor 5	EPHA5	P54756
MOL008647	Moupinamide	Ephrin type-A receptor 4	EPHA4	P54764
MOL008647	Moupinamide	Ephrin type-A receptor 8	EPHA8	P29322
MOL008647	Moupinamide	Ephrin type-A receptor 7	EPHA7	Q15375
MOL008647	Moupinamide	Ephrin type-B receptor 3	EPHB3	P54753
MOL009855	(24S)-Ethylcholesta-5,22,25-trans-3beta-ol	N-lysine methyltransferase SETD8	KMT5A	Q9NQR1
MOL009878	Cyclobuxine	Membrane-bound transcription factor site-1 protease	MBTPS1	Q14703
MOL009878	Cyclobuxine	LSD1/CoREST complex	RCOR1 KDM1A	Q9UKL0 O60341
MOL009878	Cyclobuxine	Tryptase beta-1	TPSAB1	Q15661
MOL009878	Cyclobuxine	Sphingosine 1-phosphate receptor Edg-8	S1PR5	Q9H228
MOL009878	Cyclobuxine	Sphingosine 1-phosphate receptor Edg-6	S1PR4	O95977
MOL009878	Cyclobuxine	Plasma kallikrein	KLKB1	P03952
MOL009878	Cyclobuxine	Melanocortin receptor 3	MC3R	P41968
MOL009878	Cyclobuxine	Kininogen-1	KNG1	P01042
MOL009878	Cyclobuxine	Estrogen-related receptor gamma	ESRRG	P62508
MOL009888	Gypenoside XXXVI_qt	Calpain 2	CAPN2	P17655
MOL000592	Dammaradienyl acetate	Somatostatin receptor 2	SSTR2	P30874
MOL000592	Dammaradienyl acetate	Vasopressin V1b receptor	AVPR1B	P47901
MOL000596	[(3S,4aR,6aR,6aR,6bR,8aR,12S,12aR,14aR,14bR)-4,4,6a,6b,8a,12,14b-heptamethyl-11-methylene-1,2,3,4a,5,6,6a,7,8,9,10,12,12a,13,14,14a-hexadecahydropicen-3-yl] acetate	Prokineticin receptor 1	PROKR1	Q8TCW9
