# Supplementary material for: Integrating Network Pharmacology and Experimental Validation to Investigate the Mechanisms of Huazhuojiedu Decoction to Treat Chronic Atrophic Gastritis
Source: Evid Based Complement Alternat Med. 2020 Dec 7;2020:2638362. doi: 10.1155/2020/2638362 (PMC7735863; doi:10.1155/2020/2638362)
Supplement: Supplementary Materials — Table S1: information pertaining to the 180 active compounds of HZJD decoction. Table S2: information pertaining to the 1249 targets of HZJD decoction. Table S3: the 575 significant genes associated with CAG. Table S4: the 156 potential targets for the ingredients of HZJD decoction in CAG treatment. Figure 1: PPI network of 155 common targets. The higher the degree, the redder the color, demonstrating the key targets for the treatment of CAG. Figure 2: herb-target-pathway network of HZJD decoction acting on CAG. The blue nodes represent herbs, the red nodes represent targets, and the gray nodes represent pathways. [file 2638362.f1.zip › Supplementary Materials/Supplementary Table S3.xlsx]

## Sheet: 575
Table S3: The 575 significant genes associated with CAG.
Diease	Genes	Entry	Length
CAG	TNF	P01375	233
CAG	IL1B	P01584	269
CAG	IL6	P05231	212
CAG	IL10	P22301	178
CAG	TP53	P04637	393
CAG	IL1RN	P18510	177
CAG	ALB	P02768	609
CAG	TLR4	O00206	839
CAG	IFNG	P01579	166
CAG	HLA-DRB1	P01911	266
CAG	STAT3	P40763	770
CAG	CXCL8	P10145	99
CAG	CDH1	P12830	882
CAG	KRAS	P01116	189
CAG	GAST	P01350	101
CAG	AIRE	O43918	545
CAG	IL2RA	P01589	272
CAG	EGF	P01133	1207
CAG	CD40LG	P29965	261
CAG	FAS	P49327	2511
CAG	CTLA4	P16410	223
CAG	IL13	P35225	146
CAG	TGFB1	P01137	390
CAG	FOXP3	Q9BZS1	431
CAG	FASLG	P48023	281
CAG	PTGS2	P35354	604
CAG	MIF	P03971	560
CAG	STAT1	P42224	750
CAG	IL17A	Q16552	155
CAG	IL4	P05112	153
CAG	CAT	P04040	527
CAG	CCL11	P51671	97
CAG	PTPN11	Q06124	593
CAG	S100A8	P05109	93
CAG	IL2	P60568	153
CAG	GHRL	Q9UBU3	117
CAG	MPO	P05164	745
CAG	INS	P01308	110
CAG	TERT	O14746	1132
CAG	MEN1	O00255	615
CAG	SST	P61278	116
CAG	NOS2	P35228	1153
CAG	HRAS	P01112	189
CAG	HLA-DQA1	P01909	254
CAG	CHGA	P10645	457
CAG	CCL5	P13501	91
CAG	NRAS	P01111	189
CAG	HLA-B	P01889	362
CAG	HLA-A	P04439	365
CAG	SPP1	Q9BX95	441
CAG	CRP	P02741	224
CAG	MMP1	P03956	469
CAG	HLA-C	P10321	366
CAG	PTPN22	Q9Y2R2	807
CAG	CCR6	P51684	374
CAG	TNFRSF1A	P19438	455
CAG	PGA3	P0DJD8	388
CAG	HLA-DQB1	P01920	261
CAG	CASR	P41180	1078
CAG	PGA4	P0DJD7	388
CAG	PGA5	P0DJD9	388
CAG	CFTR	P13569	1480
CAG	MMP9	P14780	707
CAG	CD28	P10747	220
CAG	LEP	P41159	167
CAG	ACE	P12821	1306
CAG	TH	P07101	528
CAG	NLRP3	Q96P20	1036
CAG	ADA	P00813	363
CAG	EGFR	P00533	1210
CAG	MTOR	P42345	2549
CAG	PGC	P20142	388
CAG	CYBB	P04839	570
CAG	VEGFA	P15692	232
CAG	CDX2	Q99626	313
CAG	TGFA	P01135	160
CAG	F2	P00734	622
CAG	LTA	P01374	205
CAG	IL11	P20809	199
CAG	TIMP1	P01033	207
CAG	CASP3	P42574	277
CAG	ODC1	P11926	461
CAG	BCL2	P10415	239
CAG	CCR5	P51681	352
CAG	MUC6	Q6W4X9	2439
CAG	CD4	P01730	458
CAG	CDKN2A	P42771	156
CAG	CBL	P22681	906
CAG	CD79A	P11912	226
CAG	TFF2	Q03403	129
CAG	CYP21A2	P08686	494
CAG	MBL2	P11226	248
CAG	LRBA	P50851	2863
CAG	ERCC6	Q03468	1493
CAG	MUC1	P15941	1255
CAG	TTR	P02766	147
CAG	CCL2	P13500	99
CAG	PTGS1	P23219	599
CAG	CXCL1	P09341	107
CAG	NLRP1	Q9C000	1473
CAG	NFKB1	P19838	968
CAG	RIPK1	Q13546	671
CAG	GZMB	P10144	247
CAG	KIT	P10721	976
CAG	ATP4A	P20648	1035
CAG	CCND1	P24385	295
CAG	IL5	P05113	134
CAG	ICAM1	P05362	532
CAG	PPARG	P37231	505
CAG	SOD1	P00441	154
CAG	AREG	P15514	252
CAG	TFRC	P02786	760
CAG	ADH7	P40394	386
CAG	ACTA2	P62736	377
CAG	PDCD1	Q15116	288
CAG	SKIV2L	Q15477	1246
CAG	TGFBR1	P36897	503
CAG	CCK	P06307	115
CAG	MMP2	P08253	660
CAG	NOD2	Q9HC29	1040
CAG	IL1A	P01583	271
CAG	PTEN	P60484	403
CAG	TLR2	O60603	784
CAG	MUC5AC	P98088	5654
CAG	PSAP	P07602	524
CAG	SERPINA3	P01011	423
CAG	ELANE	P08246	267
CAG	FN1	P02751	2477
CAG	TGFBR2	P37173	567
CAG	COMT	P21964	271
CAG	JUN	P05412	331
CAG	IL7	P13232	177
CAG	CD8A	P01732	235
CAG	RUNX3	Q13761	415
CAG	SERPINH1	P50454	418
CAG	GPT	P24298	496
CAG	CSF2	P04141	144
CAG	MET	P08581	1390
CAG	BRAF	P15056	766
CAG	CASP8	Q14790	479
CAG	ADIPOQ	Q15848	244
CAG	ERBB2	P04626	1255
CAG	SMAD3	P84022	425
CAG	BGLAP	P02818	100
CAG	MDM2	Q00987	491
CAG	IL18	Q14116	193
CAG	CTNNB1	P35222	781
CAG	CYBA	P13498	195
CAG	ITGB2	P05107	769
CAG	IGF1	P05019	195
CAG	SCT	P09683	121
CAG	EPO	P01588	193
CAG	GSTP1	P09211	210
CAG	ATP12A	P54707	1039
CAG	MTHFR	P42898	656
CAG	CXCL5	P42830	114
CAG	CXCR4	P61073	352
CAG	ENG	P17813	658
CAG	TFF3	Q07654	94
CAG	TNFSF13B	Q9Y275	285
CAG	TGFB2	P61812	414
CAG	MTR	Q99707	1265
CAG	AKT1	P31749	480
CAG	MYC	P01106	439
CAG	IL2RB	P14784	551
CAG	DNMT3A	Q9Y6K1	912
CAG	BAX	Q07812	192
CAG	DNMT1	P26358	1616
CAG	CD69	Q07108	199
CAG	CD59	P13987	128
CAG	NFKBIA	P25963	317
CAG	CD44	P16070	742
CAG	FCGR2A	P12318	317
CAG	ICOSLG	O75144	302
CAG	HSPB1	P04792	205
CAG	ALOX5	P09917	674
CAG	APC	P25054	2843
CAG	MMP7	P09237	267
CAG	GAD1	Q99259	594
CAG	TF	P02787	698
CAG	CTNNA1	P35221	906
CAG	HGF	P14210	728
CAG	B2M	P61769	119
CAG	VDR	P11473	427
CAG	TYMP	P19971	482
CAG	PLAU	P00749	431
CAG	MUC2	Q02817	5179
CAG	MT-CYB	P00156	380
CAG	TP63	Q9H3D4	680
CAG	SELE	P16581	610
CAG	SMAD4	Q13485	552
CAG	GAD2	Q05329	585
CAG	SNCA	P37840	140
CAG	APOH	P02749	345
CAG	HRH2	P25021	359
CAG	IFIH1	Q9BYX4	1025
CAG	MMP3	P08254	477
CAG	NOD1	Q9Y239	953
CAG	CXCR3	P49682	368
CAG	TPO	P07202	933
CAG	TGFB3	P10600	412
CAG	STAT5A	P42229	794
CAG	CTSW	P56202	376
CAG	SELL	P14151	372
CAG	TG	P01266	2768
CAG	BIRC5	O15392	142
CAG	ITGAL	P20701	1170
CAG	JAK1	P23458	1154
CAG	AGK	Q53H12	422
CAG	CIITA	P33076	1130
CAG	PIK3CA	P42336	1068
CAG	AICDA	Q9GZX7	198
CAG	IFNGR1	P15260	489
CAG	TLR9	Q9NR96	1032
CAG	CASP1	P29466	404
CAG	CHUK	O15111	745
CAG	HSPD1	P10809	573
CAG	CYP17A1	P05093	508
CAG	CDKN1A	P38936	164
CAG	GSTM1	P09488	218
CAG	PCNA	P12004	261
CAG	HP	P00738	406
CAG	FGF2	P09038	288
CAG	NOTCH1	P46531	2555
CAG	CCL3	P10147	92
CAG	FUT2	Q10981	343
CAG	CALCA	P06881	128
CAG	CD34	P28906	385
CAG	CBLIF	P27352	417
CAG	STAT4	Q14765	748
CAG	SLC17A5	Q9NRA2	495
CAG	ERCC2	P18074	760
CAG	RFXANK	O14593	260
CAG	MAPK1	P28482	360
CAG	CYP1A2	P05177	516
CAG	SLC2A1	P11166	492
CAG	KRT7	P08729	469
CAG	CD40	P25942	277
CAG	VCAM1	P19320	739
CAG	RB1	P06400	928
CAG	SH2D1A	O60880	128
CAG	CFLAR	O15519	480
CAG	IL1R1	P14778	569
CAG	HMGB1	P09429	215
CAG	MUC5B	Q9HC84	5762
CAG	DES	P17661	470
CAG	IL21	Q9HBE4	162
CAG	IL23A	Q9NPF7	189
CAG	GGT1	P19440	569
CAG	BMP6	P22004	513
CAG	G6PD	P11413	515
CAG	TPH1	P17752	444
CAG	SERPINE1	P05121	402
CAG	IL1RAPL2	Q9NP60	686
CAG	DDC	P20711	480
CAG	TCN1	P20061	433
CAG	SQSTM1	Q13501	440
CAG	ANXA5	P08758	320
CAG	CR1	P17927	2039
CAG	MUC4	Q99102	2169
CAG	CD274	Q9NZQ7	290
CAG	IKBKB	O14920	756
CAG	MLH1	P40692	756
CAG	CYP11A1	P05108	521
CAG	ERCC4	Q92889	916
CAG	TTC37	Q6PGP7	1564
CAG	MAPK14	Q16539	360
CAG	GSTT1	P30711	240
CAG	SOD2	P04179	222
CAG	CASP9	P55211	416
CAG	TIA1	P31483	386
CAG	CXCL12	P48061	93
CAG	MAP3K6	O95382	1288
CAG	TIMP2	P16035	220
CAG	CDKN1B	P46527	198
CAG	HIF1A	Q16665	826
CAG	CCKBR	P32239	447
CAG	NFE2L2	Q16236	605
CAG	DNMT3B	Q9UBC3	853
CAG	GH1	P01241	217
CAG	MMP12	P39900	470
CAG	MMP8	P22894	467
CAG	NUP107	P57740	925
CAG	MAPK8	P45983	427
CAG	HDC	P19113	662
CAG	FOS	P01100	380
CAG	LTF	P02788	710
CAG	TLR5	O60602	858
CAG	IGHE	P01854	428
CAG	HSPA4	P34932	840
CAG	CYP2E1	P05181	493
CAG	THBD	P07204	575
CAG	CYP1A1	P04798	512
CAG	ITGB1	P05556	798
CAG	TNFSF10	P50591	281
CAG	MCL1	Q07820	350
CAG	S100A9	P06702	114
CAG	IGFBP1	P08833	259
CAG	MKI67	P46013	3256
CAG	IL6ST	P40189	918
CAG	IL22	Q9GZX6	179
CAG	SELP	P49908	381
CAG	KRT18	P05783	430
CAG	TIMP3	P35625	211
CAG	TRAPPC10	P48553	1259
CAG	TNXB	P22105	4244
CAG	LMNB1	P20700	586
CAG	BCL2L1	Q07817	233
CAG	SYK	P43405	635
CAG	CCR7	P32248	378
CAG	ALDH2	P05091	517
CAG	ERCC5	P28715	1186
CAG	F3	P13726	295
CAG	XDH	P47989	1333
CAG	SRC	P12931	536
CAG	NUP133	Q8WUM0	1156
CAG	HBEGF	Q99075	208
CAG	CCL4	P13236	92
CAG	CCL20	P78556	96
CAG	ERCC8	Q13216	396
CAG	CCN2	P29279	349
CAG	SHH	Q15465	462
CAG	TLR1	Q15399	786
CAG	MSH2	P43246	934
CAG	ACVRL1	P37023	503
CAG	OGG1	O15527	345
CAG	NOTCH3	Q9UM47	2321
CAG	ALPP	P05187	535
CAG	CRH	P06850	196
CAG	AR	P10275	920
CAG	IGF2	P01344	180
CAG	GJA1	P17302	382
CAG	VIP	P01282	170
CAG	SFTPD	P35247	375
CAG	TCF7L2	Q9NQB0	619
CAG	PDX1	P52945	283
CAG	COX5A	P20674	150
CAG	GATA3	P23771	443
CAG	IL12A	P29459	219
CAG	SMO	Q99835	787
CAG	CTSB	P07858	339
CAG	HSPA1A	P0DMV8	641
CAG	XPC	Q01831	940
CAG	AGER	Q15109	404
CAG	CD27	P26842	260
CAG	KRT8	P05787	483
CAG	KRT20	P35900	424
CAG	HSP90AA1	P07900	732
CAG	XRCC1	P18887	633
CAG	EZR	P15311	586
CAG	HSPG2	P98160	4391
CAG	DNTT	P04053	509
CAG	F5	P12259	2224
CAG	DDB2	Q92466	427
CAG	NF1	P21359	2839
CAG	PTK2	Q05397	1052
CAG	EZH2	Q15910	746
CAG	CD55	P08174	381
CAG	NKX2-1	P43699	371
CAG	TXN	P10599	105
CAG	KRT19	P08727	400
CAG	RASSF1	Q9NS23	344
CAG	NUDT10	Q8NFP7	164
CAG	LIF	P15018	202
CAG	LPO	P22079	712
CAG	GJB1	P08034	283
CAG	CEACAM5	P06731	702
CAG	FOXP2	O15409	715
CAG	YAP1	P46937	504
CAG	HOXA10	P31260	410
CAG	CXCR5	P32302	372
CAG	GHR	P10912	638
CAG	TCN2	P20062	427
CAG	KLK3	P07288	261
CAG	NEU1	Q99519	415
CAG	MAPK3	P27361	379
CAG	SMAD2	Q15796	467
CAG	THBS1	P07996	1170
CAG	IL4R	P24394	825
CAG	VIM	P08670	466
CAG	BAK1	Q16611	211
CAG	TNFSF13	O75888	250
CAG	BIRC3	Q13489	604
CAG	MMD	Q15546	238
CAG	IL9	P15248	144
CAG	KRT1	P04264	644
CAG	CD46	P15529	392
CAG	AURKA	O14965	403
CAG	OSM	P13725	252
CAG	TFF1	P04155	84
CAG	ANXA1	P04083	346
CAG	MUC3A	Q02505	3323
CAG	HDAC2	Q92769	488
CAG	ABO	P16442	354
CAG	CNTF	P26441	200
CAG	S100A12	P80511	92
CAG	TSLP	Q969D9	159
CAG	TIMM8A	O60220	97
CAG	NOX1	Q9Y5S8	564
CAG	CA2	P00918	260
CAG	SERPINC1	P01008	464
CAG	CXCL2	P19875	107
CAG	C1QTNF6	Q9BXI9	278
CAG	TGM2	P21980	687
CAG	TP73	O15350	636
CAG	SNRNP70	P08621	437
CAG	TLR10	Q9BXR5	811
CAG	ENO1	P06733	434
CAG	PAM16	Q9Y3D7	125
CAG	GSK3B	P49841	420
CAG	RAD51	Q06609	339
CAG	ENO2	P09104	434
CAG	ERBB3	P21860	1342
CAG	GRP	P07492	148
CAG	IL32	P24001	234
CAG	PPT1	P50897	306
CAG	COL4A3	Q01955	1670
CAG	PRKAA1	Q13131	559
CAG	CMA1	P23946	247
CAG	PGR	P06401	933
CAG	TNFRSF10A	O00220	468
CAG	DNAH8	Q96JB1	4490
CAG	F13A1	P00488	732
CAG	CHRM3	P20309	590
CAG	BCL6	P41182	706
CAG	MLN	P12872	115
CAG	GRN	P28799	593
CAG	GPI	P06744	558
CAG	CTSL	P07711	333
CAG	ACTC1	P68032	377
CAG	ADH1B	P00325	375
CAG	CDH13	P55290	713
CAG	TRAF6	Q9Y4K3	522
CAG	NQO1	P15559	274
CAG	GDF15	Q99988	308
CAG	CLDN4	O14493	209
CAG	FGF7	P21781	194
CAG	TREM1	Q9NP99	234
CAG	FOXJ1	Q92949	421
CAG	PIK3C2A	O00443	1686
CAG	BAD	Q92934	168
CAG	PTPN3	P26045	913
CAG	EPCAM	P16422	314
CAG	MMP14	P50281	582
CAG	SDC1	P18827	310
CAG	DUOX2	Q9NRD8	1548
CAG	CYP2C9	P11712	490
CAG	CLDN2	P57739	230
CAG	MUC16	Q8WXI7	14507
CAG	SLC19A1	P41440	591
CAG	CALB2	P22676	271
CAG	STK11	Q15831	433
CAG	GAB1	Q13480	694
CAG	CLEC16A	Q2KHT3	1053
CAG	CCNB1	P14635	433
CAG	CEBPB	P17676	345
CAG	BLVRB	P30043	206
CAG	PDX1,PDHX	O00330	501
CAG	FCRL3	Q96P31	734
CAG	PSCA	O43653	114
CAG	SYP	P08247	313
CAG	HSPA1B	P0DMV9	641
CAG	CHIA	Q9BZP6	476
CAG	AHR	P35869	848
CAG	PYY	P10082	97
CAG	REG1A	P05451	166
CAG	KIR2DS4	P43632	304
CAG	CTSK	P43235	329
CAG	IFI27	P40305	122
CAG	ADAM10	O14672	748
CAG	HSPA1L	P34931	641
CAG	FTL	P02792	175
CAG	SMAD7	O15105	426
CAG	PLK1	P53350	603
CAG	FHIT	P49789	147
CAG	PAK1	Q13153	545
CAG	TNC	P24821	2201
CAG	DAPK1	P53355	1430
CAG	FUT3	P21217	361
CAG	RAB7A	P51149	207
CAG	ETV5	P41161	510
CAG	CLDN11	O75508	207
CAG	LSM2	Q9Y333	95
CAG	GATA4	P43694	442
CAG	CEACAM1	P13688	526
CAG	SAPCD2	Q86UD0	394
CAG	COL14A1	Q05707	1796
CAG	NDUFS5	O43920	106
CAG	SERPINB2	P05120	415
CAG	DROSHA	Q9NRR4	1374
CAG	POU5F1	Q01860	360
CAG	CD24	P25063	80
CAG	CBS	P35520	551
CAG	SLC18A2	Q05940	514
CAG	CD276	Q5ZPR3	534
CAG	ZEB1	P37275	1124
CAG	SSPN	Q14714	243
CAG	UCHL1	P09936	223
CAG	HSPA2	P54652	639
CAG	BLZF1	Q9H2G9	400
CAG	PBX1	P40424	430
CAG	GLI2	P10070	1586
CAG	JRK	O75564	556
CAG	PIAS1	O75925	651
CAG	MTRR	Q9UBK8	698
CAG	THBS4	P35443	961
CAG	S100A4	P26447	101
CAG	CD63	P08962	238
CAG	DMBT1	Q9UGM3	2413
CAG	BIRC7	Q96CA5	298
CAG	SMTN	P53814	917
CAG	CCL28	Q9NRJ3	127
CAG	CTHRC1	Q96CG8	243
CAG	CASP4	P49662	377
CAG	ALPG	P10696	532
CAG	GATA6	Q92908	595
CAG	KDM1A	O60341	852
CAG	UGT1A6	P19224	532
CAG	CTF1	Q16619	201
CAG	IGF2BP3	O00425	579
CAG	INS-IGF2	F8WCM5	200
CAG	POMGNT2	Q8NAT1	580
CAG	NUCB2	P80303	420
CAG	ERGIC1	Q969X5	290
CAG	TDGF1	P13385	188
CAG	HDAC6	Q9UBN7	1215
CAG	CDX1	P47902	265
CAG	PRKCH	P24723	683
CAG	CLCF1	Q9UBD9	225
CAG	CTAG1B	P78358	180
CAG	FGF4	P08620	206
CAG	CHGB	P05060	677
CAG	CDR1	P51861	262
CAG	MAGEA4	P43358	317
CAG	SLC5A5	Q92911	643
CAG	KLHL6	Q8WZ60	621
CAG	GKN1	Q9NS71	199
CAG	SMO,SMOX	Q9NWM0	555
CAG	RIOX2	Q8IUF8	465
CAG	DVL2	O14641	736
CAG	IL18RAP	O95256	599
CAG	HSD17B2	P37059	387
CAG	LAMA1	P25391	3075
CAG	NOXO1	Q8NFA2	376
CAG	TREH	O43280	583
CAG	LAPTM4B	Q86VI4	317
CAG	NOXA1	Q86UR1	476
CAG	PIWIL1	Q96J94	861
CAG	TUSC3	Q13454	348
CAG	CLIC1	O00299	241
CAG	CASP6	P55212	293
CAG	NKX6-3	A6NJ46	265
CAG	NDUFA13	Q9P0J0	144
CAG	SELENBP1	Q13228	472
CAG	MTHFD1	P11586	935
CAG	CLDN23	Q96B33	292
CAG	SLC18A1	P54219	525
CAG	FUBP1	Q96AE4	644
CAG	DLL4	Q9NR61	685
CAG	CEACAM7	Q14002	265
CAG	FOXD1	Q16676	465
CAG	LGR5	O75473	907
CAG	HPGD	P15428	266
CAG	BCL9	O00512	1426
CAG	VTCN1	Q7Z7D3	282
CAG	ABHD11	Q8NFV4	315
CAG	PCDH10	Q9P2E7	1040
CAG	APBA2	Q99767	749
CAG	CCNC	P24863	283
CAG	ZNF318	Q5VUA4	2279
CAG	MARK2	Q7KZI7	788
CAG	PCDH17	O14917	1159
CAG	RPRM	Q9NS64	109
CAG	ATP4B	P51164	291
CAG	RASSF10	A6NK89	507
