# Supplementary material for: Integrating Network Pharmacology and Experimental Validation to Investigate the Mechanisms of Huazhuojiedu Decoction to Treat Chronic Atrophic Gastritis
Source: Evid Based Complement Alternat Med. 2020 Dec 7;2020:2638362. doi: 10.1155/2020/2638362 (PMC7735863; doi:10.1155/2020/2638362)
Supplement: Supplementary Materials — Table S1: information pertaining to the 180 active compounds of HZJD decoction. Table S2: information pertaining to the 1249 targets of HZJD decoction. Table S3: the 575 significant genes associated with CAG. Table S4: the 156 potential targets for the ingredients of HZJD decoction in CAG treatment. Figure 1: PPI network of 155 common targets. The higher the degree, the redder the color, demonstrating the key targets for the treatment of CAG. Figure 2: herb-target-pathway network of HZJD decoction acting on CAG. The blue nodes represent herbs, the red nodes represent targets, and the gray nodes represent pathways. [file 2638362.f1.zip › Supplementary Materials/Supplementary Table S4.xlsx]

## Sheet: 156
Table S4: The 156 potential targets for the ingredients of HZJD decoction in CAG treatment.
Genes	Uniprod
TLR4	O00206
PIK3C2A	O00443
ADAM10	O14672
TERT	O14746
IKBKB	O14920
AURKA	O14965
CHUK	O15111
BIRC5	O15392
TREH	O43280
KDM1A	O60341
F13A1	P00488
EGFR	P00533
F2	P00734
PLAU	P00749
ADA	P00813
CA2	P00918
NRAS	P01111
HRAS	P01112
TNF	P01375
FN1	P02751
TTR	P02766
ALB	P02768
MMP1	P03956
ERBB2	P04626
TP53	P04637
CYP1A1	P04798
ALDH2	P05091
CYP17A1	P05093
SERPINE1	P05121
MPO	P05164
CYP1A2	P05177
IL6	P05231
ICAM1	P05362
JUN	P05412
PGR	P06401
KLK3	P07288
CTSL	P07711
CTSB	P07858
HSP90AA1	P07900
ELANE	P08246
MMP2	P08253
MMP3	P08254
MET	P08581
IGFBP1	P08833
FGF2	P09038
GSTP1	P09211
MMP7	P09237
ALOX5	P09917
HSPA1A	P0DMV8
GLI2	P10070
CXCL8	P10145
AR	P10275
BCL2	P10415
ALPG	P10696
KIT	P10721
SLC2A1	P11166
G6PD	P11413
VDR	P11473
CYP2C9	P11712
ODC1	P11926
PCNA	P12004
F5	P12259
ACE	P12821
SRC	P12931
CFTR	P13569
F3	P13726
SELL	P14151
MMP9	P14780
BRAF	P15056
EZR	P15311
HPGD	P15428
NQO1	P15559
VEGFA	P15692
SELE	P16581
VCAM1	P19320
TNFRSF1A	P19438
NFKB1	P19838
TYMP	P19971
PGC	P20142
CHRM3	P20309
ITGAL	P20701
COMT	P21964
TGM2	P21980
MMP8	P22894
PTGS1	P23219
JAK1	P23458
CMA1	P23946
PRKCH	P24723
HRH2	P25021
NFKBIA	P25963
DNMT1	P26358
MAPK3	P27361
MAPK1	P28482
ERCC5	P28715
CASP1	P29466
AKT1	P31749
CCKBR	P32239
NOS2	P35228
PTGS2	P35354
AHR	P35869
TGFBR1	P36897
ACVRL1	P37023
HSD17B2	P37059
TGFBR2	P37173
PPARG	P37231
SNCA	P37840
MMP12	P39900
IL6ST	P40189
STAT3	P40763
CASR	P41180
SLC19A1	P41440
STAT1	P42224
PIK3CA	P42336
MTOR	P42345
CASP3	P42574
CTSK	P43235
SYK	P43405
MAPK8	P45983
XDH	P47989
FASN	P49327
CXCR3	P49682
GSK3B	P49841
MMP14	P50281
CCR5	P51681
PLK1	P53350
DAPK1	P53355
ATP12A	P54707
CASP6	P55212
IL2	P60568
CXCR4	P61073
MDM2	Q00987
PTK2	Q05397
SLC18A2	Q05940
PTPN11	Q06124
BCL2L1	Q07817
MCL1	Q07820
PRKAA1	Q13131
PAK1	Q13153
BIRC3	Q13489
CASP8	Q14790
SHH	Q15465
EZH2	Q15910
MAPK14	Q16539
HIF1A	Q16665
HDAC2	Q92769
BAD	Q92934
NLRP3	Q96P20
SMO	Q99835
NOD2	Q9HC29
TLR9	Q9NR96
CD274	Q9NZQ7
DNMT3B	Q9UBC3
HDAC6	Q9UBN7
NOD1	Q9Y239
PTPN22	Q9Y2R2
NOX1	Q9Y5S8
